# Supplementary material for: Oxidative radical coupling of hydroquinones and thiols using chromic acid: one-pot synthesis of quinonyl alkyl/aryl thioethers
Source: Royal Society of Chemistry journal article supplement (doi:10.1039/d0ra01519a), 2020-01-01
Supplement: d0ra01519a1.pdf [file d0ra01519a1.pdf]

## Supporting Information

### **Oxidative Radical Coupling of Hydroquinones and Thiols Using Chromic Acid: One-Pot Synthesis of Quinonyl Alkyl/Aryl Thioethers**

T.P. Adarsh Krishna., Sakthivel Pandaram., Suresh Chinnasamy and Andivelu Ilangovan\*

*School of Chemistry, Bharathidasan University, Tiruchirappalli, Tamilnadu-620024, India. Email: [ilangovanbdu@yahoo.com](mailto:ilangovanbdu@yahoo.com)*

---

#### Table of Contents

|    |                                                                  |      |
|----|------------------------------------------------------------------|------|
| 1. | Copies of <sup>1</sup> H NMR, <sup>13</sup> C NMR Spectra        | S 02 |
| 2. | ADME-PK properties and molecular characterization of <b>5a-c</b> | S 55 |
| 3. | AChE docking studies of compound of <b>5b</b>                    | S 56 |
| 4. | References                                                       | S 57 |

---

# 1. Copies of <sup>1</sup>H NMR, <sup>13</sup>C NMR Spectra

THIO-01

7.257  
6.748  
6.723  
6.668  
6.643  
6.349

3.636  
3.015  
2.997  
2.979  
2.679  
2.661  
2.643

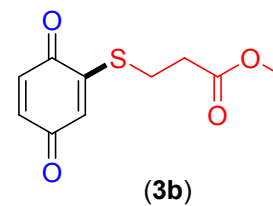

Methyl 3-((3,6-dioxocyclohexa-1,4-dien-1-yl)thio)propanoate

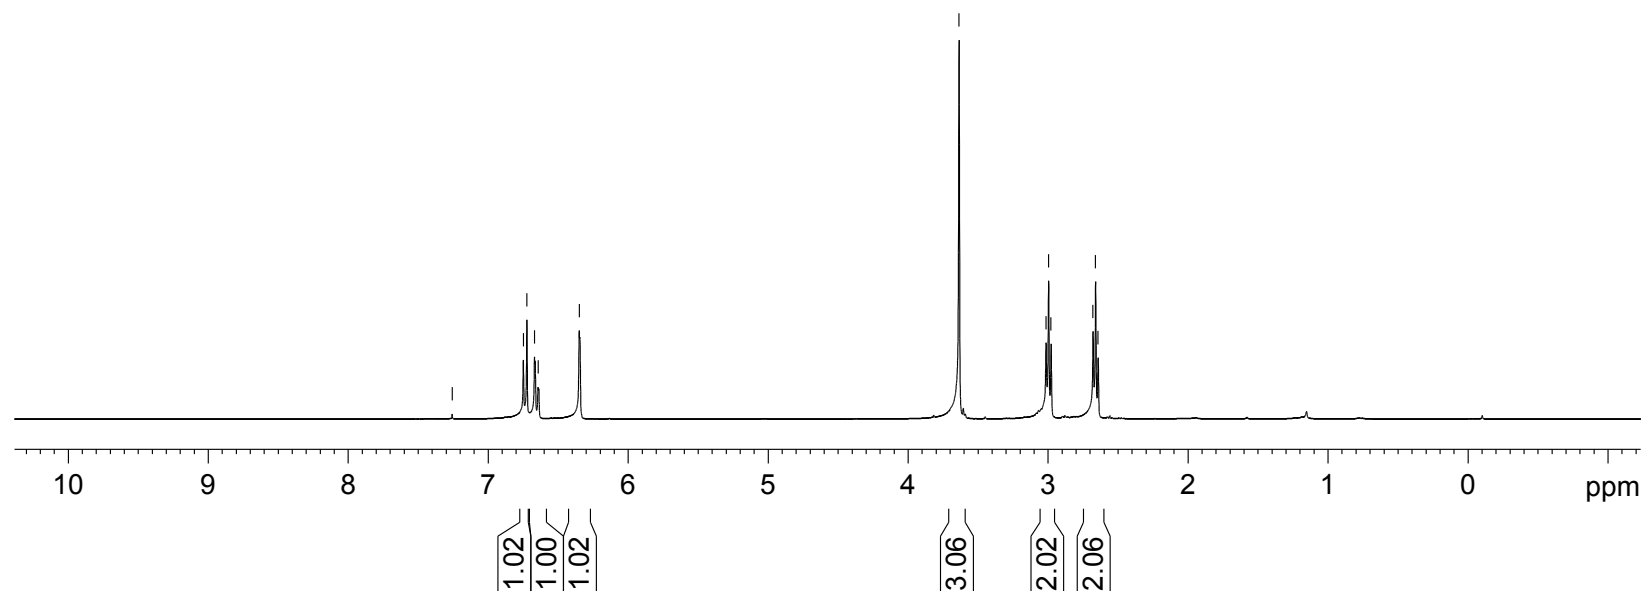

THIO-01

183.83  
183.65

171.16

151.84

137.41  
136.15

124.93

77.54  
77.23  
76.91

52.15

31.92

24.97

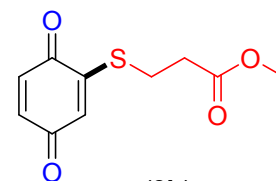

(3b)

Methyl 3-((3,6-dioxocyclohexa-1,4-dien-1-yl)thio)propanoate

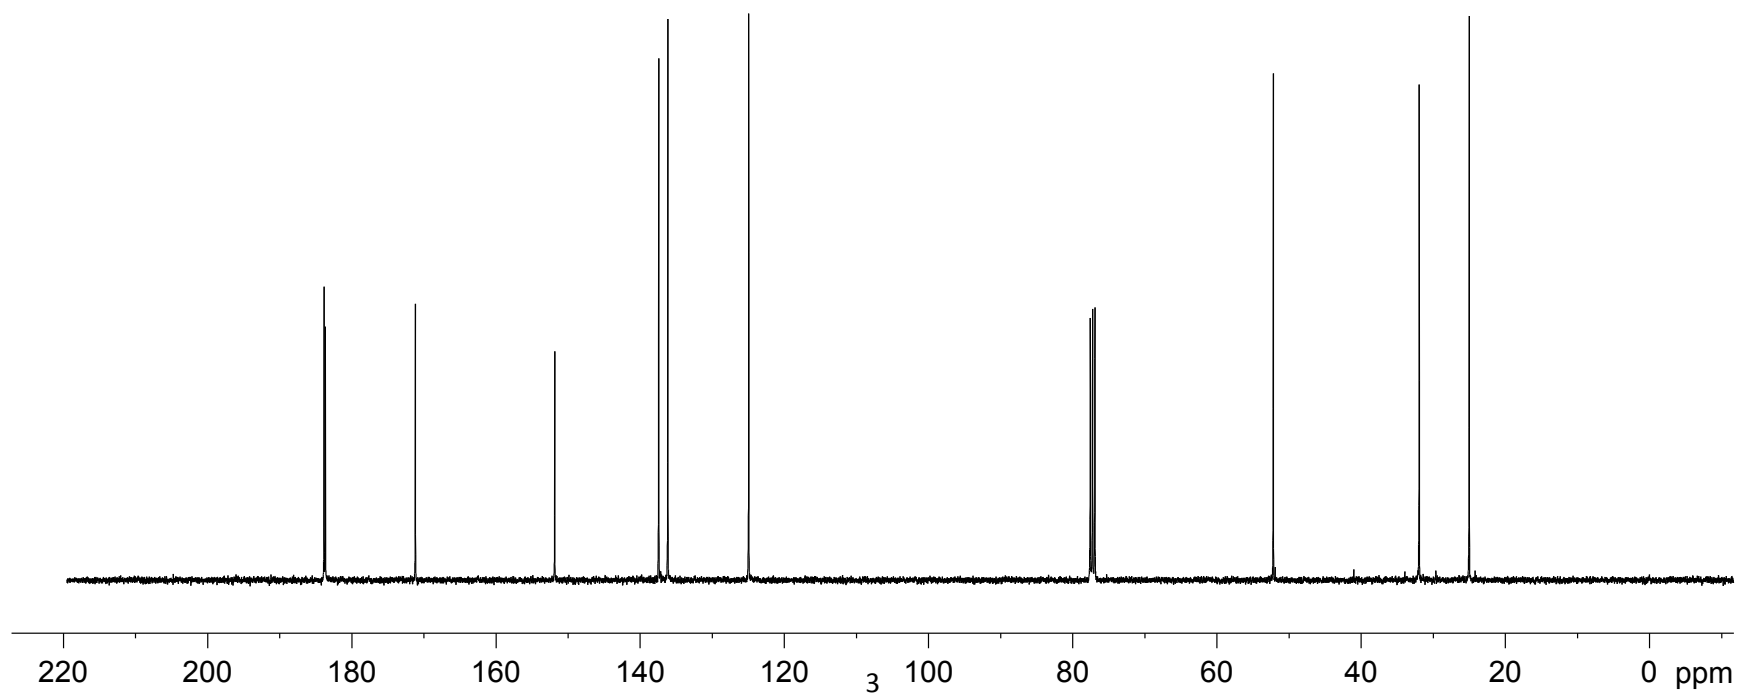

6.723  
6.698  
6.643  
6.617  
6.332

4.085  
4.078  
4.072  
4.054  
2.992  
2.974  
2.958  
2.640  
2.622  
2.607

1.178  
1.161  
1.143

//

//

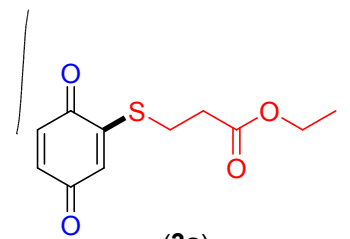

(3a)

Ethyl 3-((3,6-dioxocyclohexa-1,4-dien-1-yl)thio)propanoate

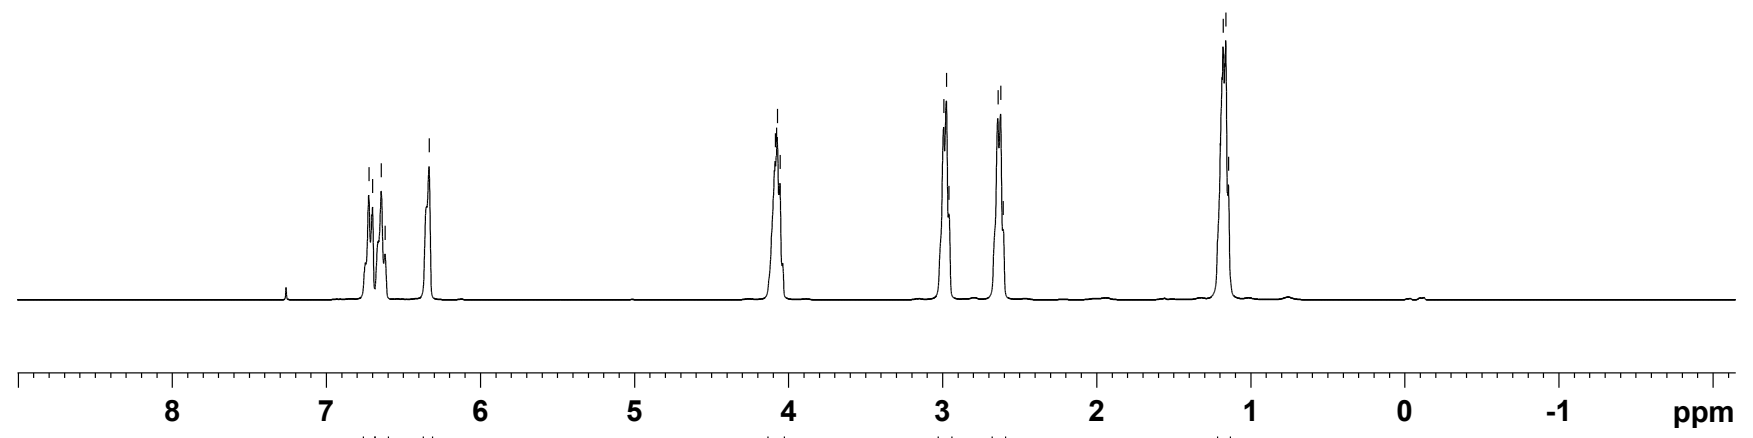

1.00  
1.00  
1.00

2.04

4

2.06

2.05

3.11

ppm

183.80  
183.63

170.67

151.86

137.38  
136.12

124.91

77.58  
77.26  
76.94

61.08

32.14

24.99

14.14

THIO-06

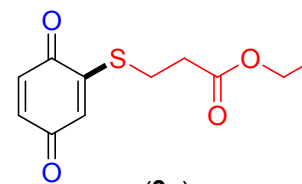

(3a)

Ethyl 3-((3,6-dioxocyclohexa-1,4-dien-1-yl)thio)propanoate

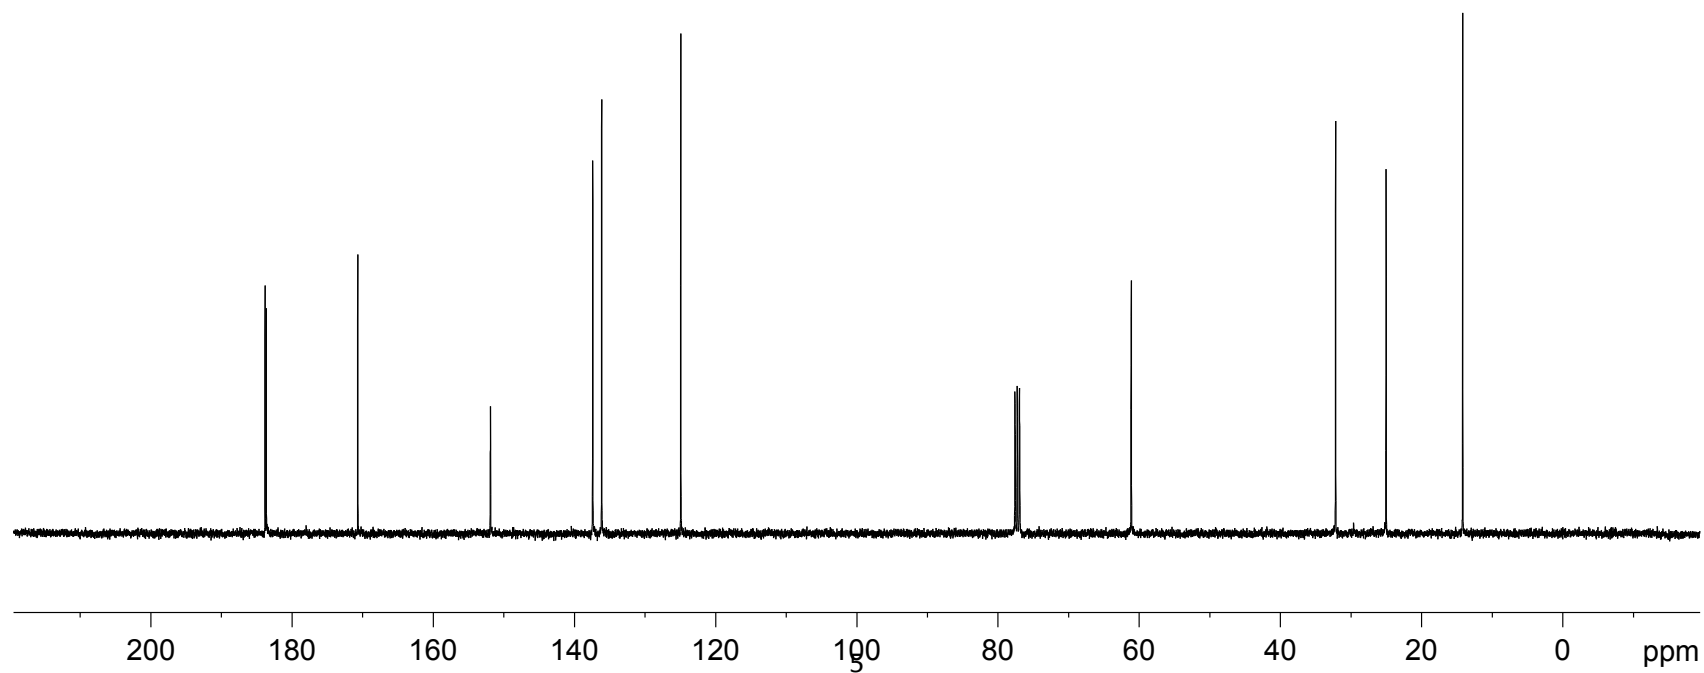

THIO-08

7.259  
6.765  
6.739  
6.686  
6.681  
6.660  
6.656  
6.370

4.073  
4.056  
4.039  
3.027  
3.009  
2.991  
2.683  
2.665  
2.647  
1.590  
1.573  
1.556  
1.537  
1.519  
1.357  
1.339  
1.320  
1.301  
1.283  
1.264  
0.882  
0.864  
0.845

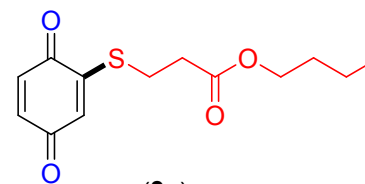

(3c)

Butyl 3-((3,6-dioxocyclohexa-1,4-dien-1-yl)thio)propanoate

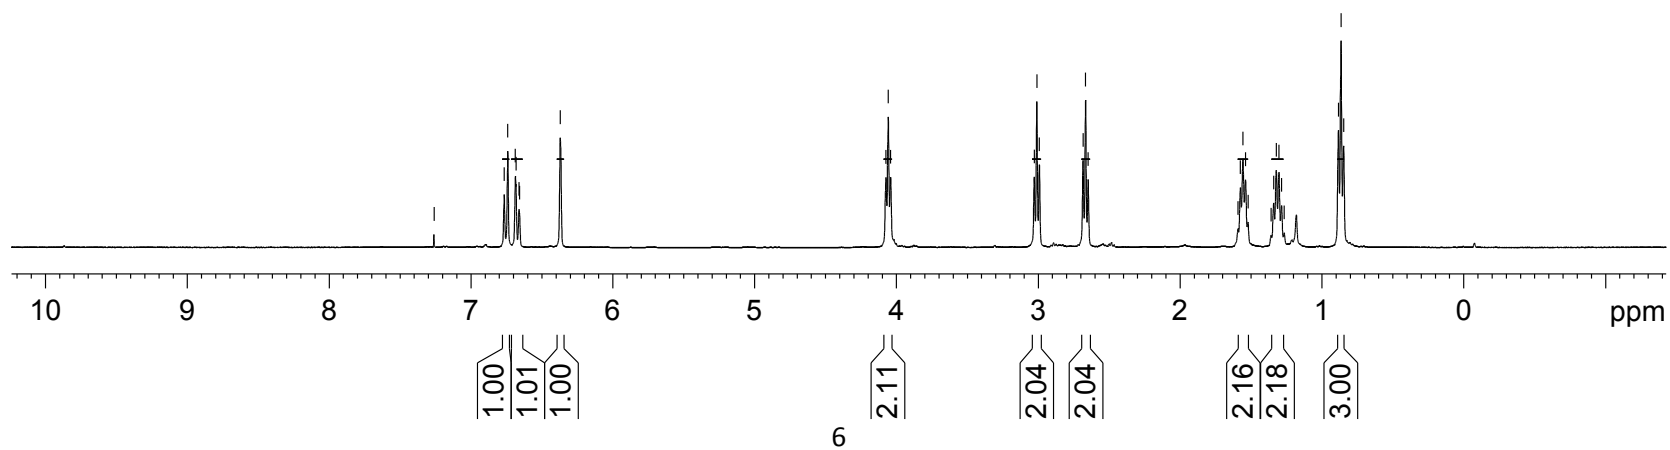

183.86  
183.66

170.82

151.96

137.43  
136.16

124.92

77.51  
77.19  
76.87  
65.07

32.15  
30.52  
25.05  
19.07  
13.68

THIO-08

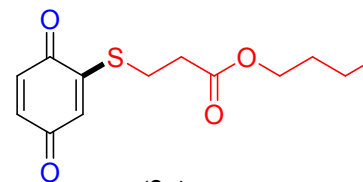

(3c)

Butyl 3-((3,6-dioxocyclohexa-1,4-dien-1-yl)thio)propanoate

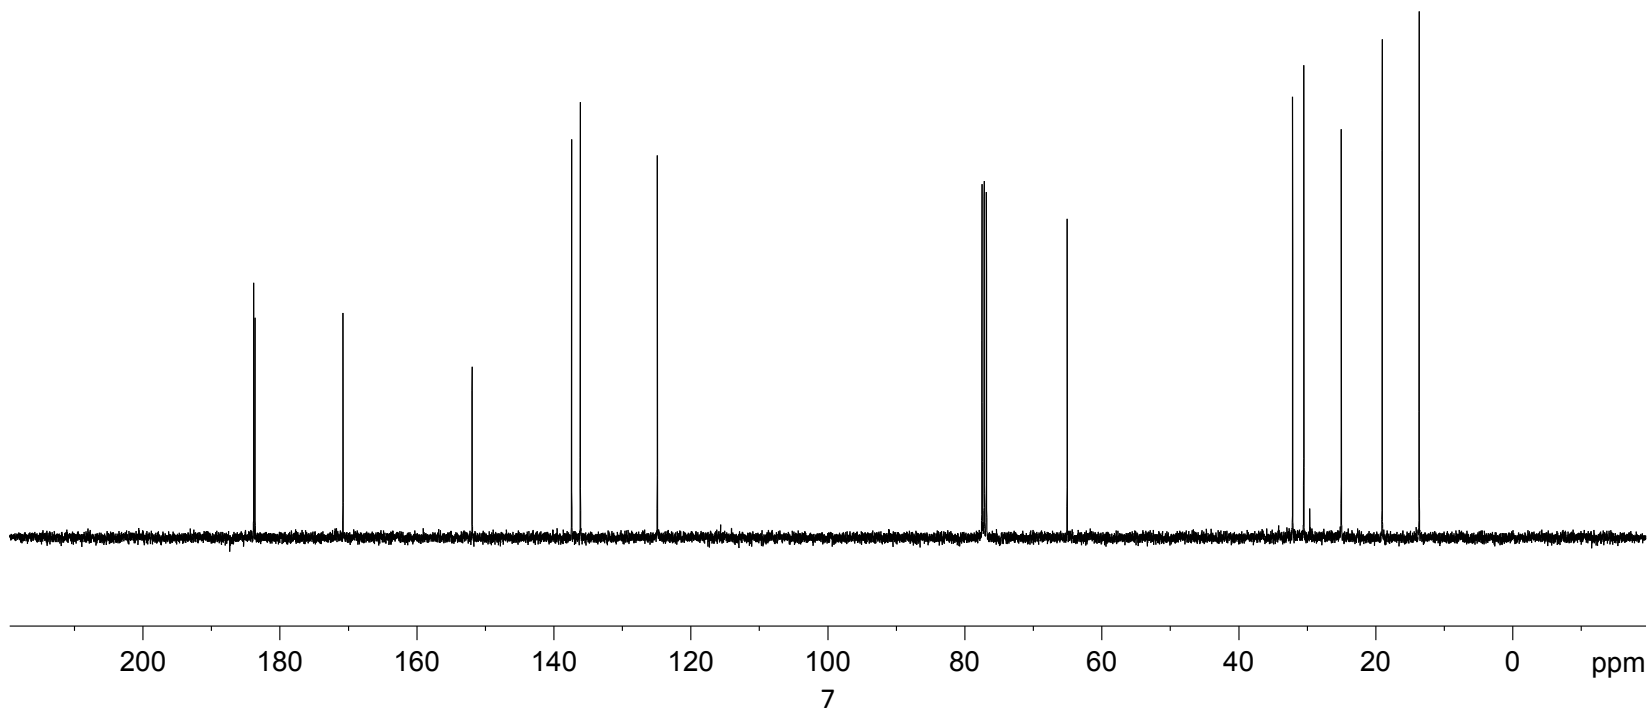

THIO-02

7.260  
6.775  
6.750  
6.696  
6.671  
6.382  
6.378

4.072  
4.067  
4.060  
4.043  
3.038  
3.020  
3.002  
2.693  
2.675  
2.657

1.585  
1.280  
1.274  
0.848

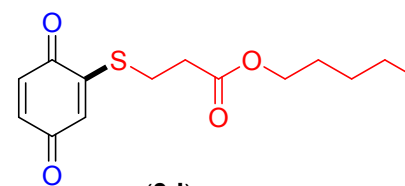

(3d)

Pentyl 3-((3,6-dioxocyclohexa-1,4-dien-1-yl)thio)propanoate

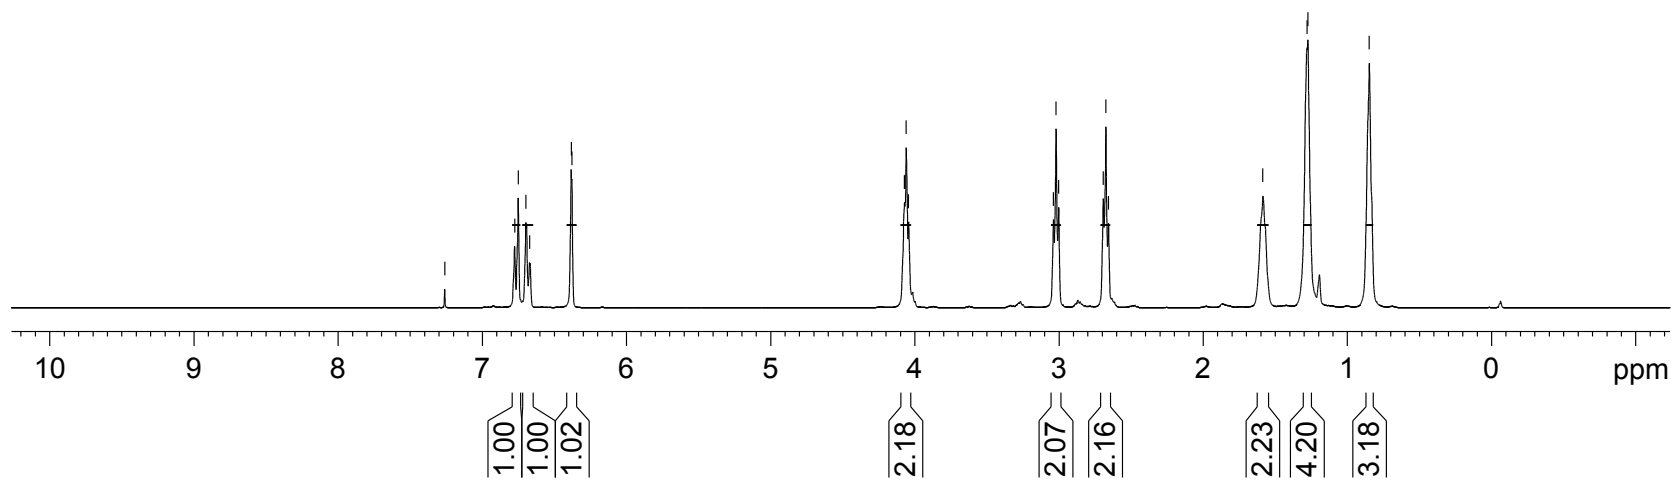



THIO-02

183.83  
183.64

170.78

151.97

137.43  
136.15

124.93

77.47  
77.15  
76.83

65.36

32.18  
28.20  
27.99  
25.07  
22.27  
13.93

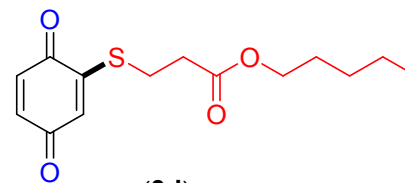

(3d)

Pentyl 3-((3,6-dioxocyclohexa-1,4-dien-1-yl)thio)propanoate

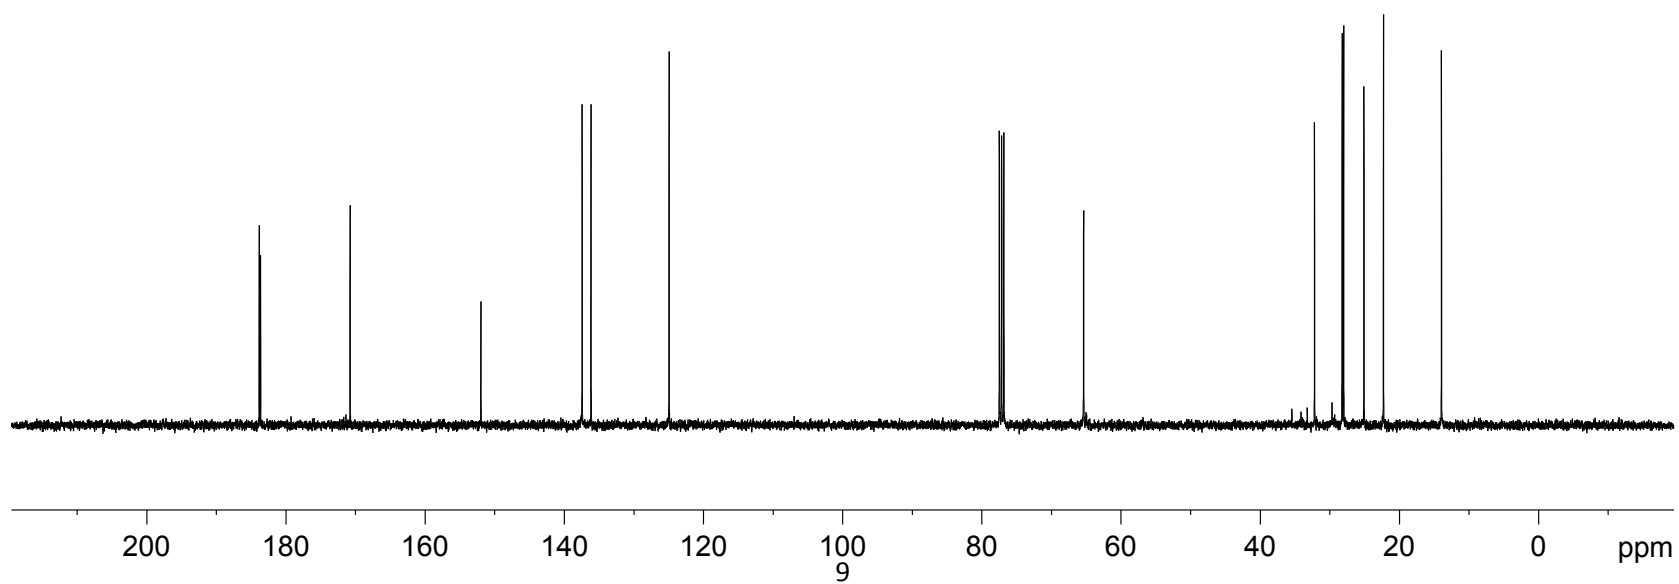

THIO-03

7.261  
6.801  
6.776  
6.723  
6.718  
6.698  
6.693  
6.407

4.108  
4.091  
4.074  
3.061  
3.043  
3.025  
2.717  
2.699  
2.681  
1.642  
1.625  
1.608  
1.590  
1.573  
1.278  
0.877  
0.861  
0.845

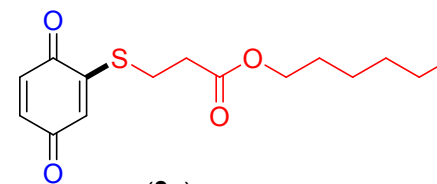

(3e)

Hexyl 3-((3,6-dioxocyclohexa-1,4-dien-1-yl)thio)propanoate

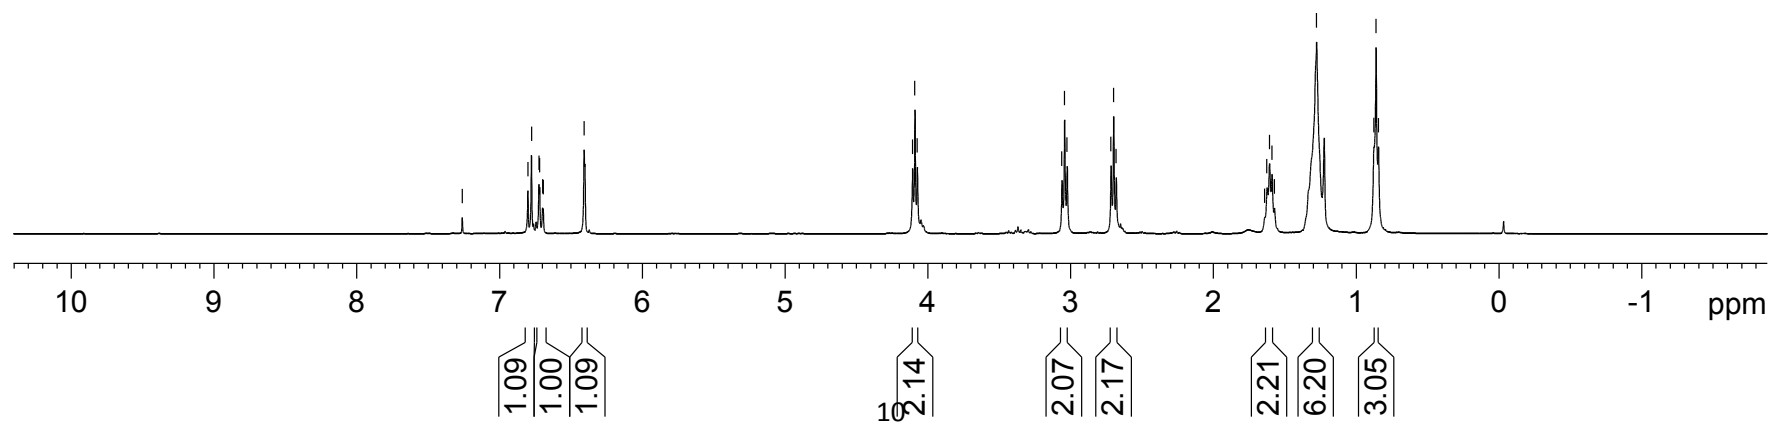

THIO-03

183.85  
183.65

170.80

152.02

137.45  
136.17

124.95

77.41  
77.09  
76.77

65.43

32.20  
31.38  
28.49  
25.54  
25.11  
22.51  
13.99

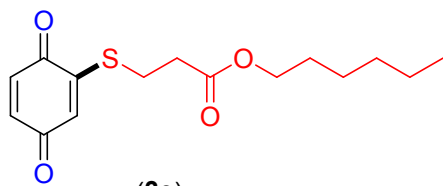

(3e)

Hexyl 3-((3,6-dioxocyclohexa-1,4-dien-1-yl)thio)propanoate

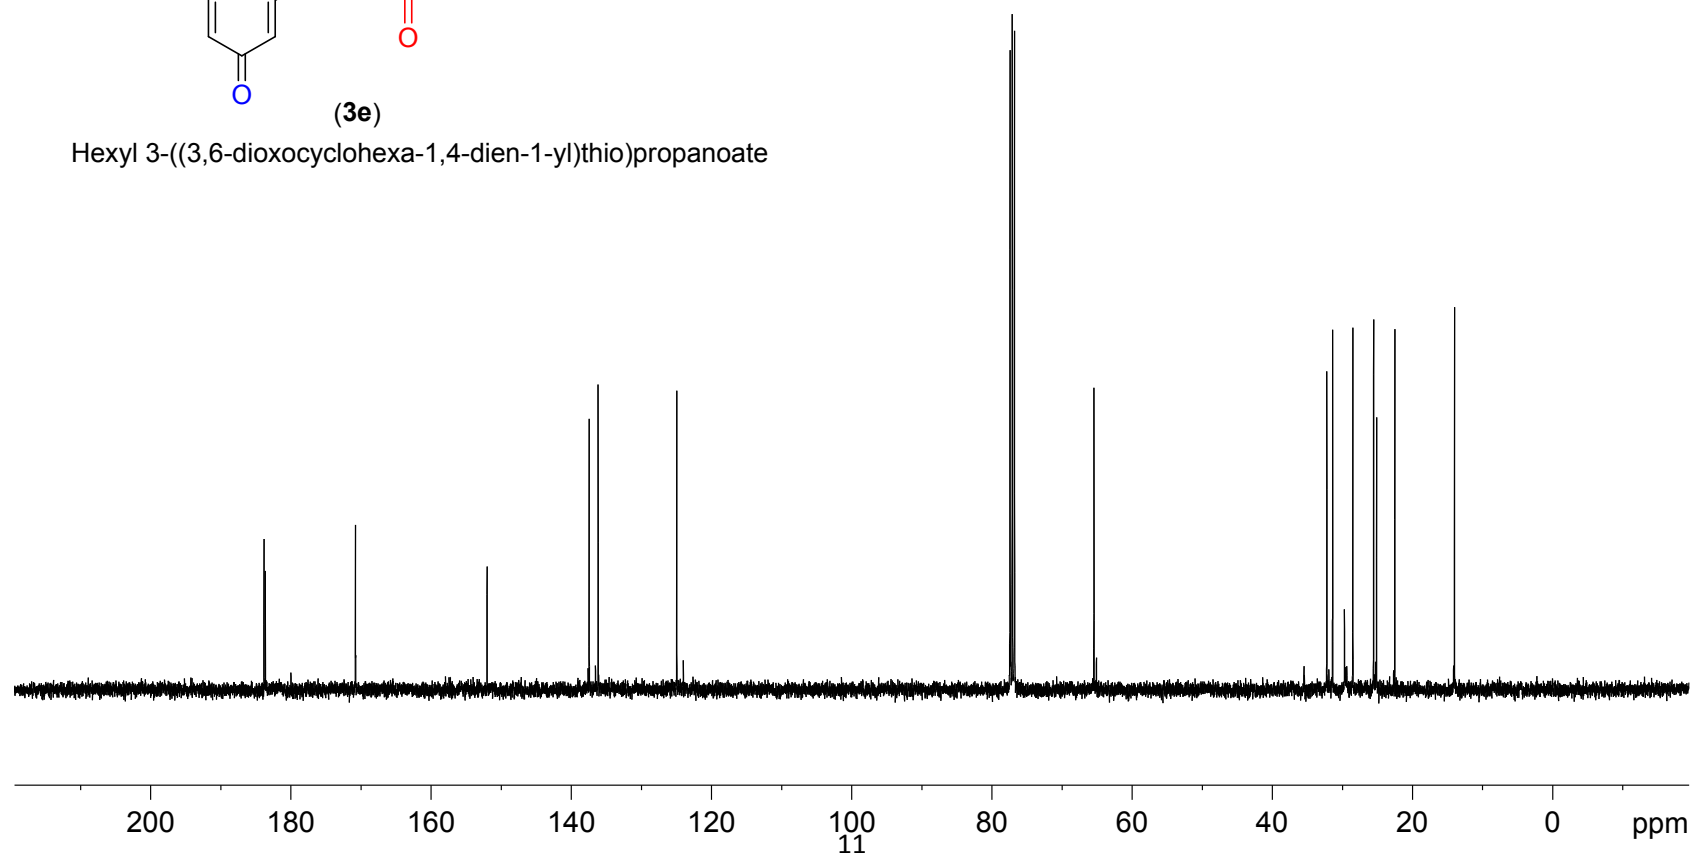

THIO-05

7.628  
7.111  
7.086  
7.027  
7.002  
6.713  
5.361  
5.345  
5.330  
5.314  
5.298  
5.283  
5.268  
3.364  
3.346  
3.328  
2.994  
2.976  
2.957  
1.535  
1.519

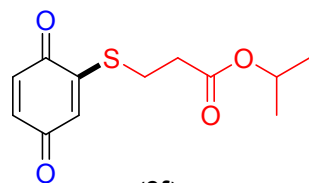

(3f)

Isopropyl 3-((3,6-dioxocyclohexa-1,4-dien-1-yl)thio)propanoate

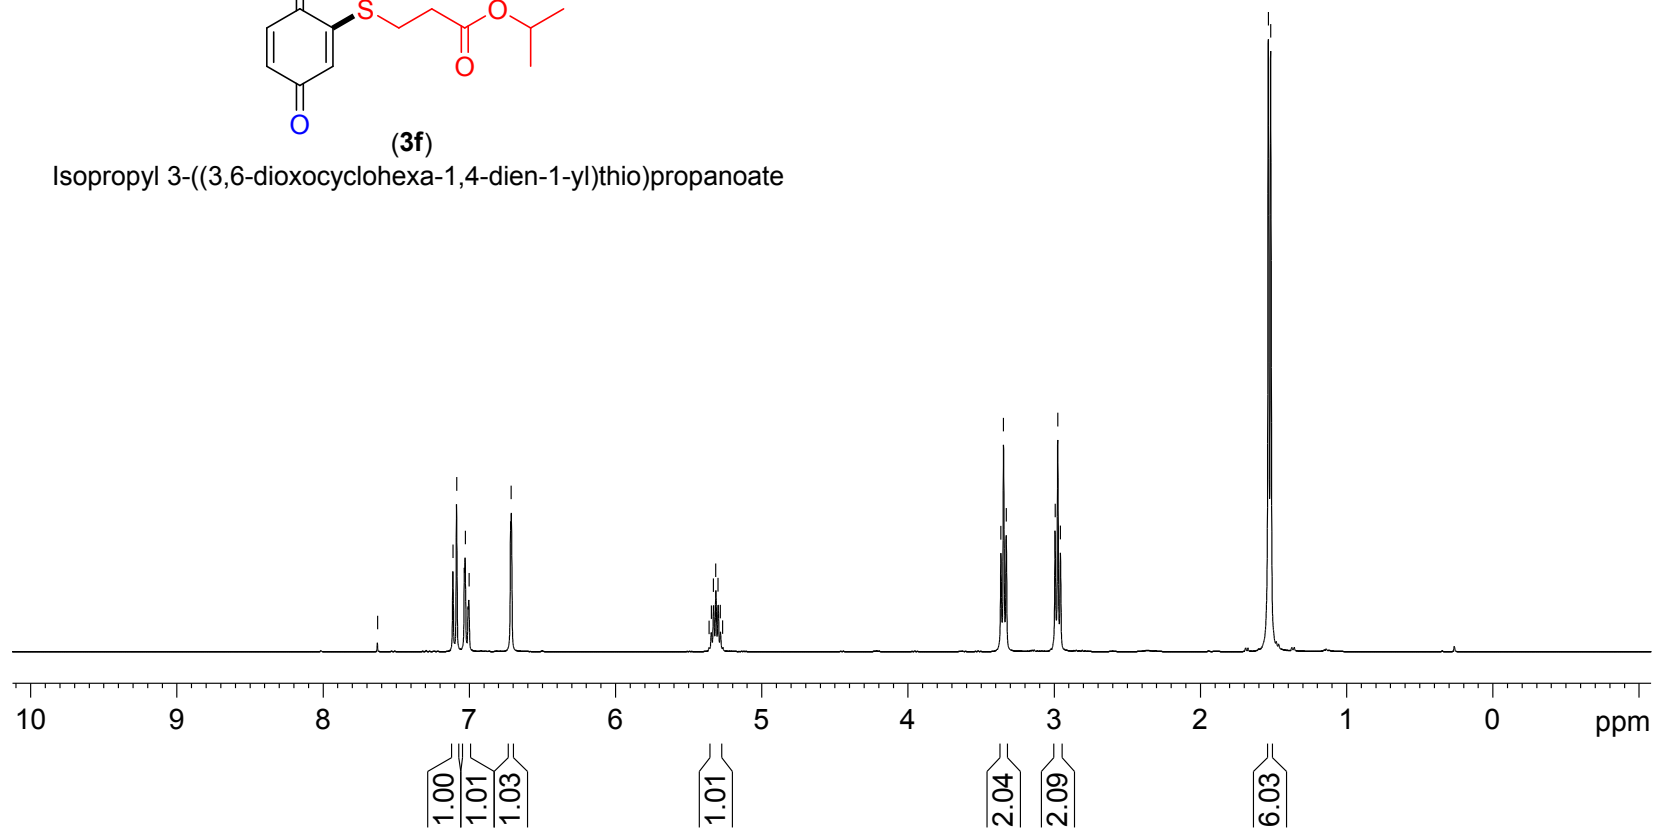

183.83  
183.66

170.19

151.97

137.41  
136.14

124.89

77.55  
77.23  
76.91  
68.72

32.42  
29.62  
25.06  
21.77

THIO-05

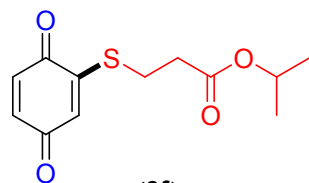

(3f)

Isopropyl 3-((3,6-dioxocyclohexa-1,4-dien-1-yl)thio)propanoate

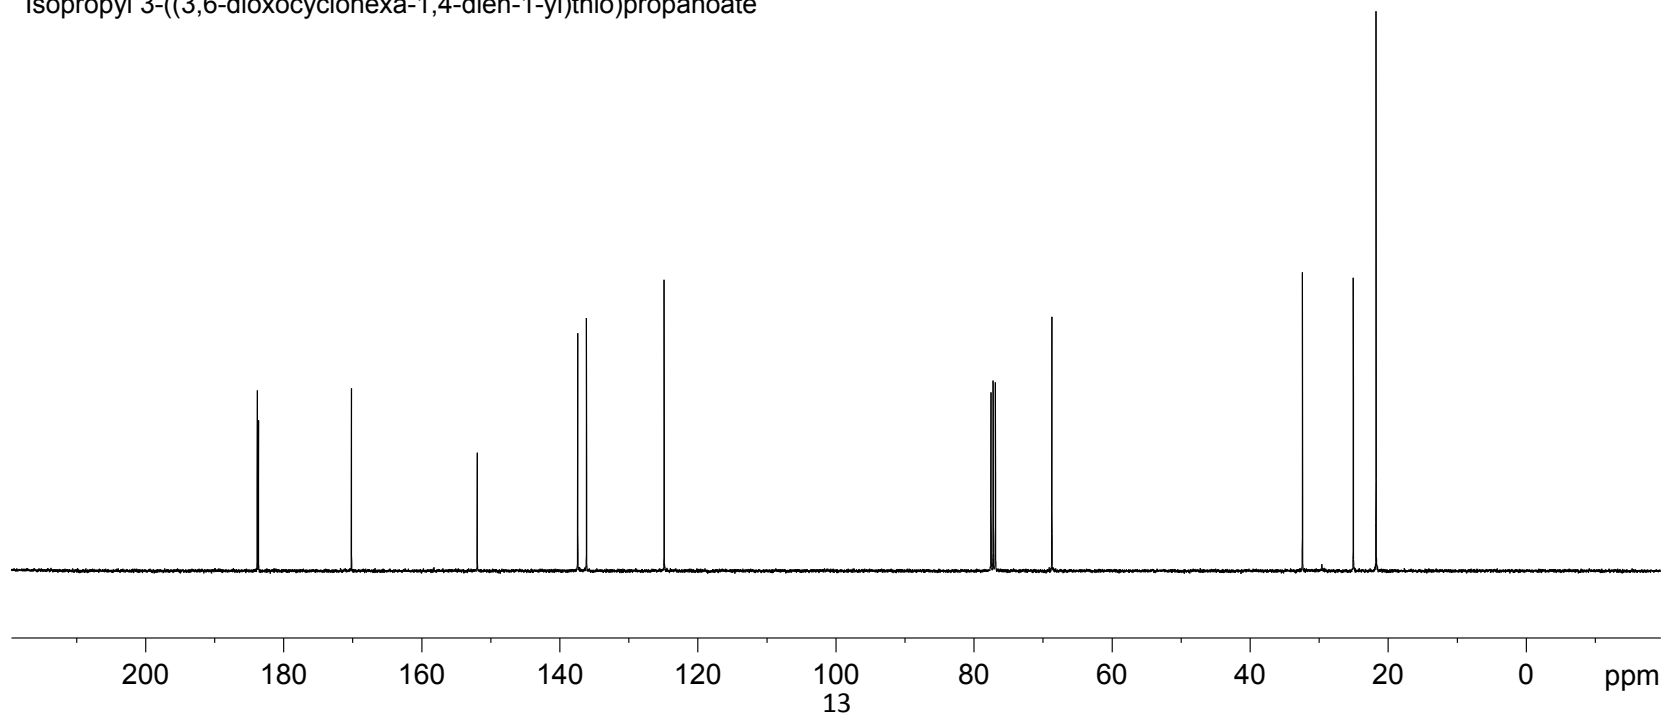

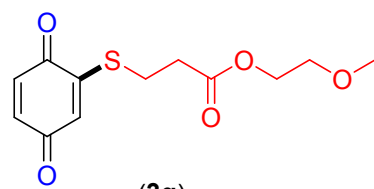

(3g)

2-methoxyethyl 3-((3,6-dioxocyclohexa-1,4-dien-1-yl)thio)propanoate

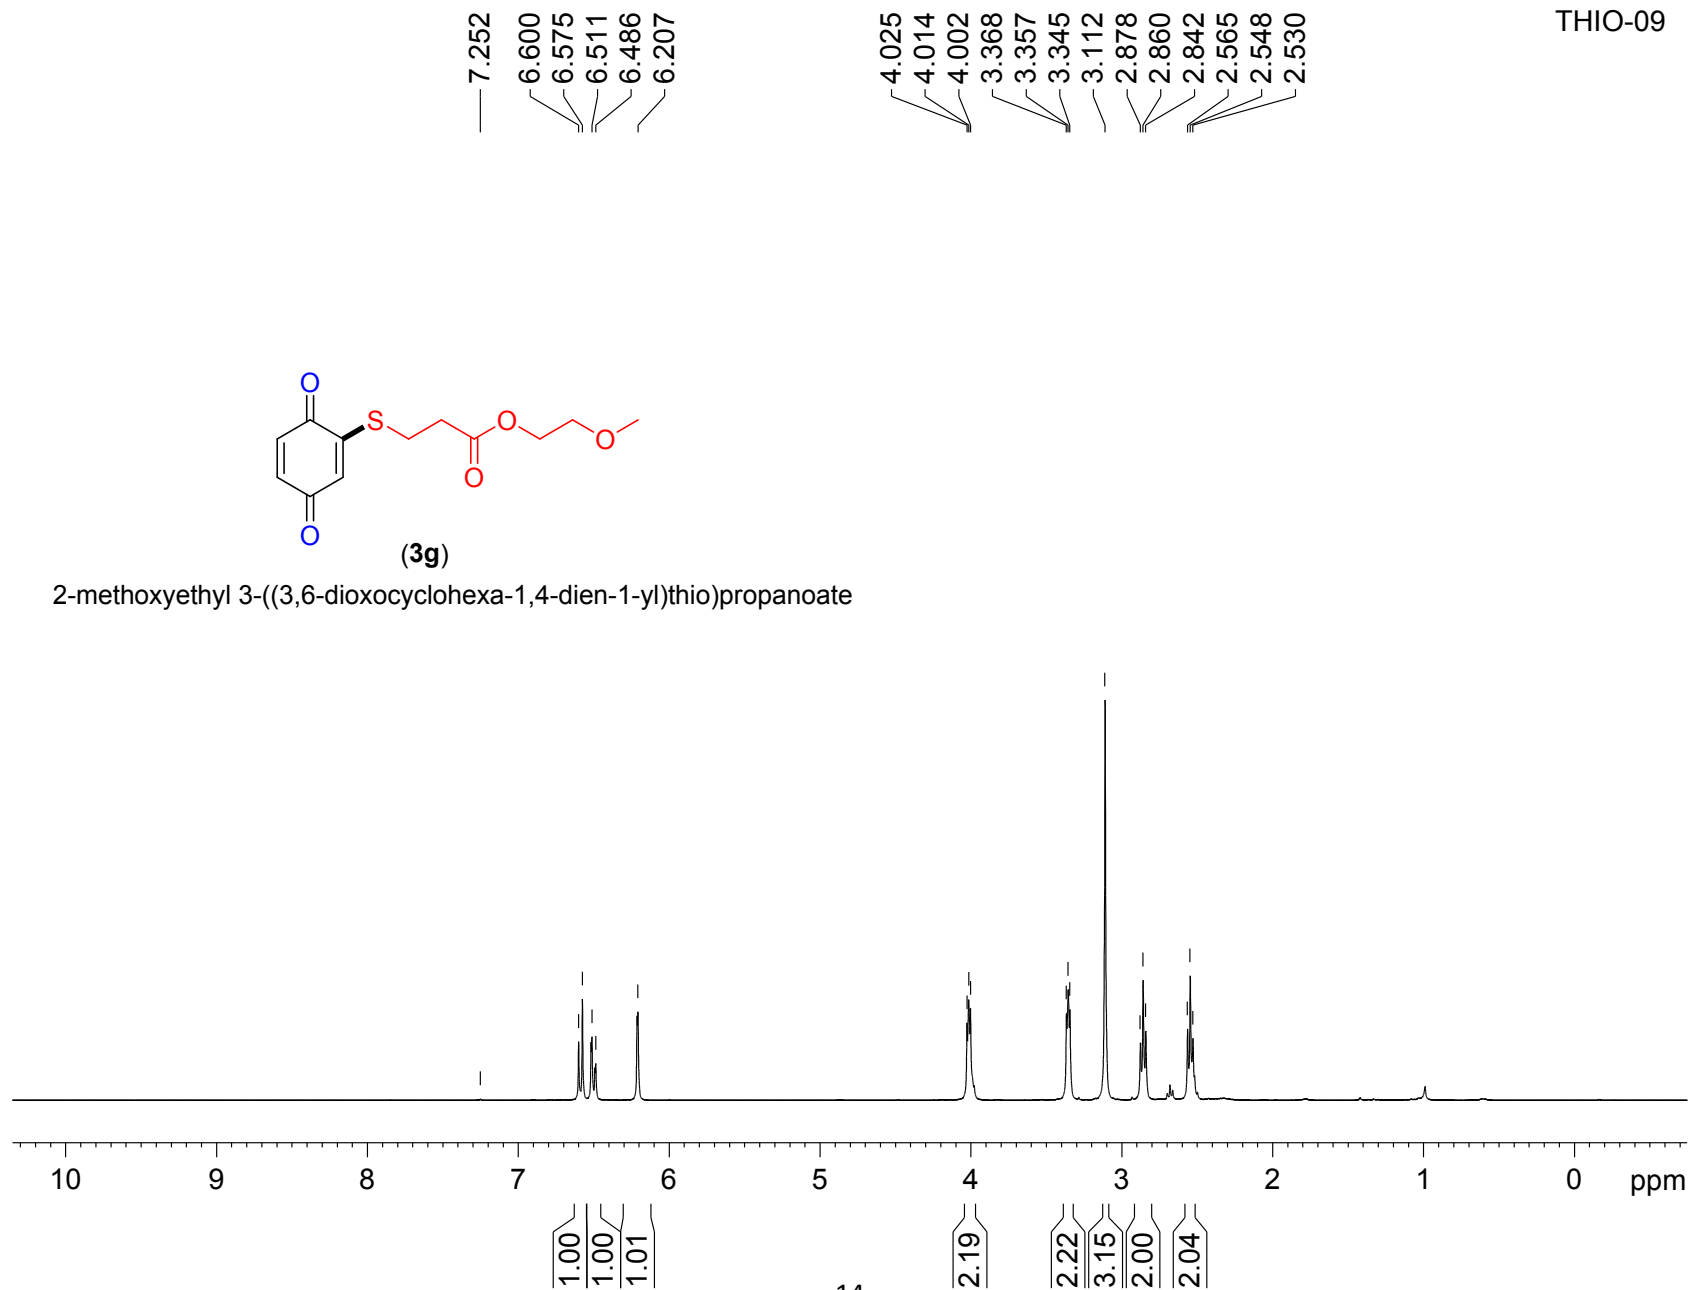

183.73  
183.57  
— 170.70  
— 151.59  
137.26  
136.02  
— 124.85

77.84  
77.52  
77.19  
70.04  
63.88  
58.64

— 31.88  
— 24.74

THIO-09

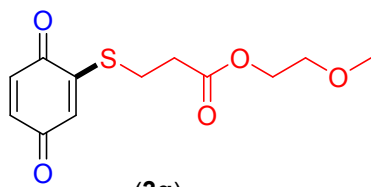

(3g)

2-methoxyethyl 3-((3,6-dioxocyclohexa-1,4-dien-1-yl)thio)propanoate

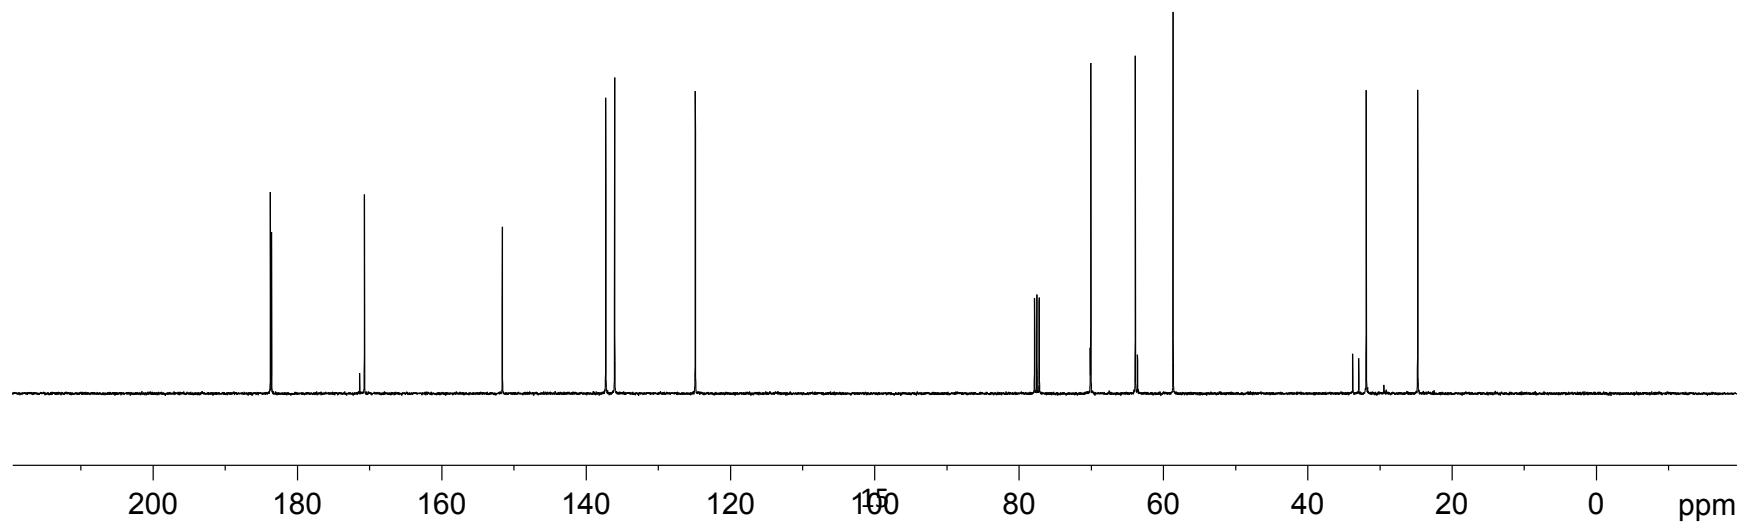

7.239  
7.231  
7.219  
7.213  
7.209  
6.665  
6.640  
6.590  
6.565  
6.303

5.035

2.967  
2.949  
2.931  
2.673  
2.655  
2.637

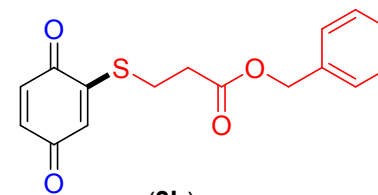

(3h)

Benzyl 3-((3,6-dioxocyclohexa-1,4-dien-1-yl)thio)propanoate

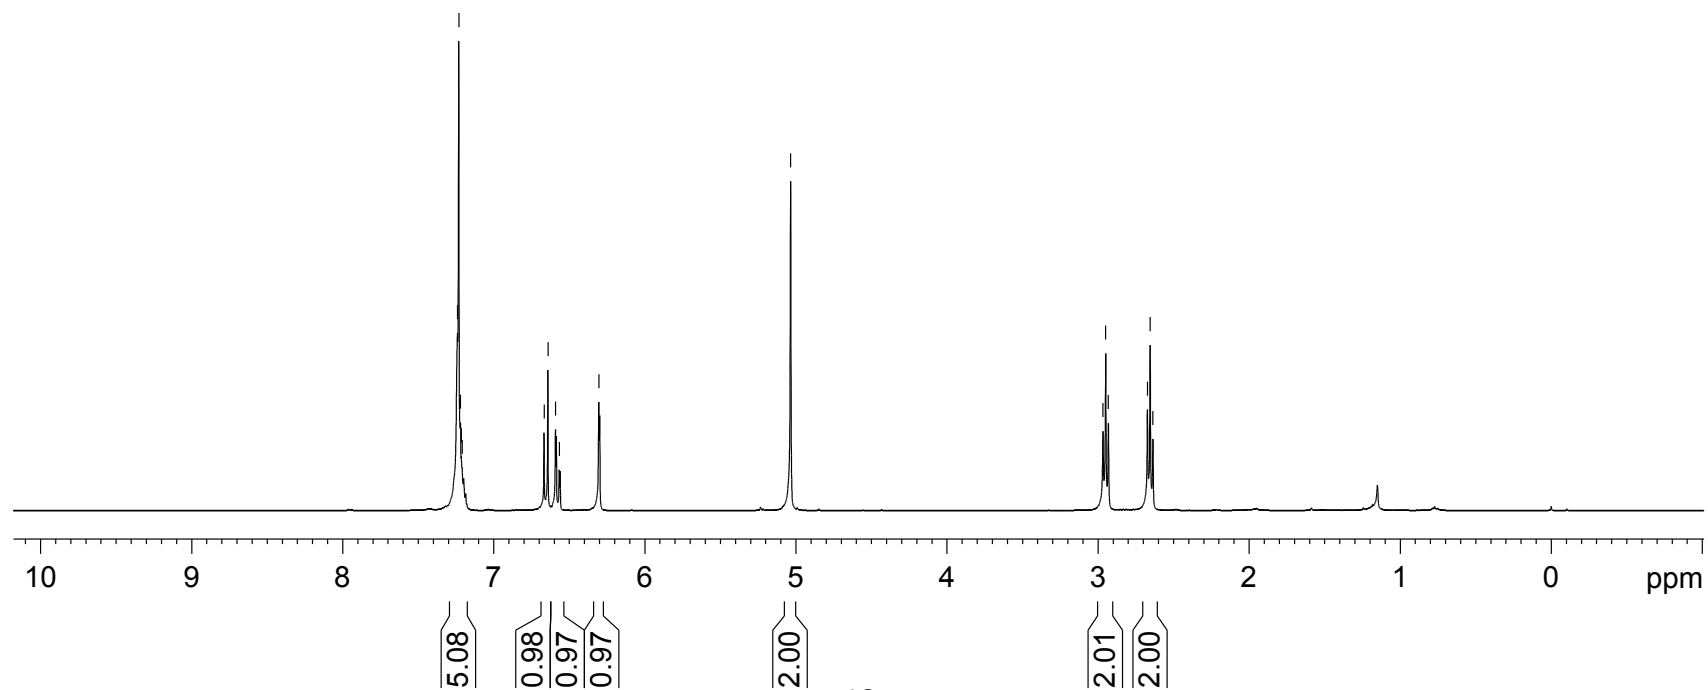



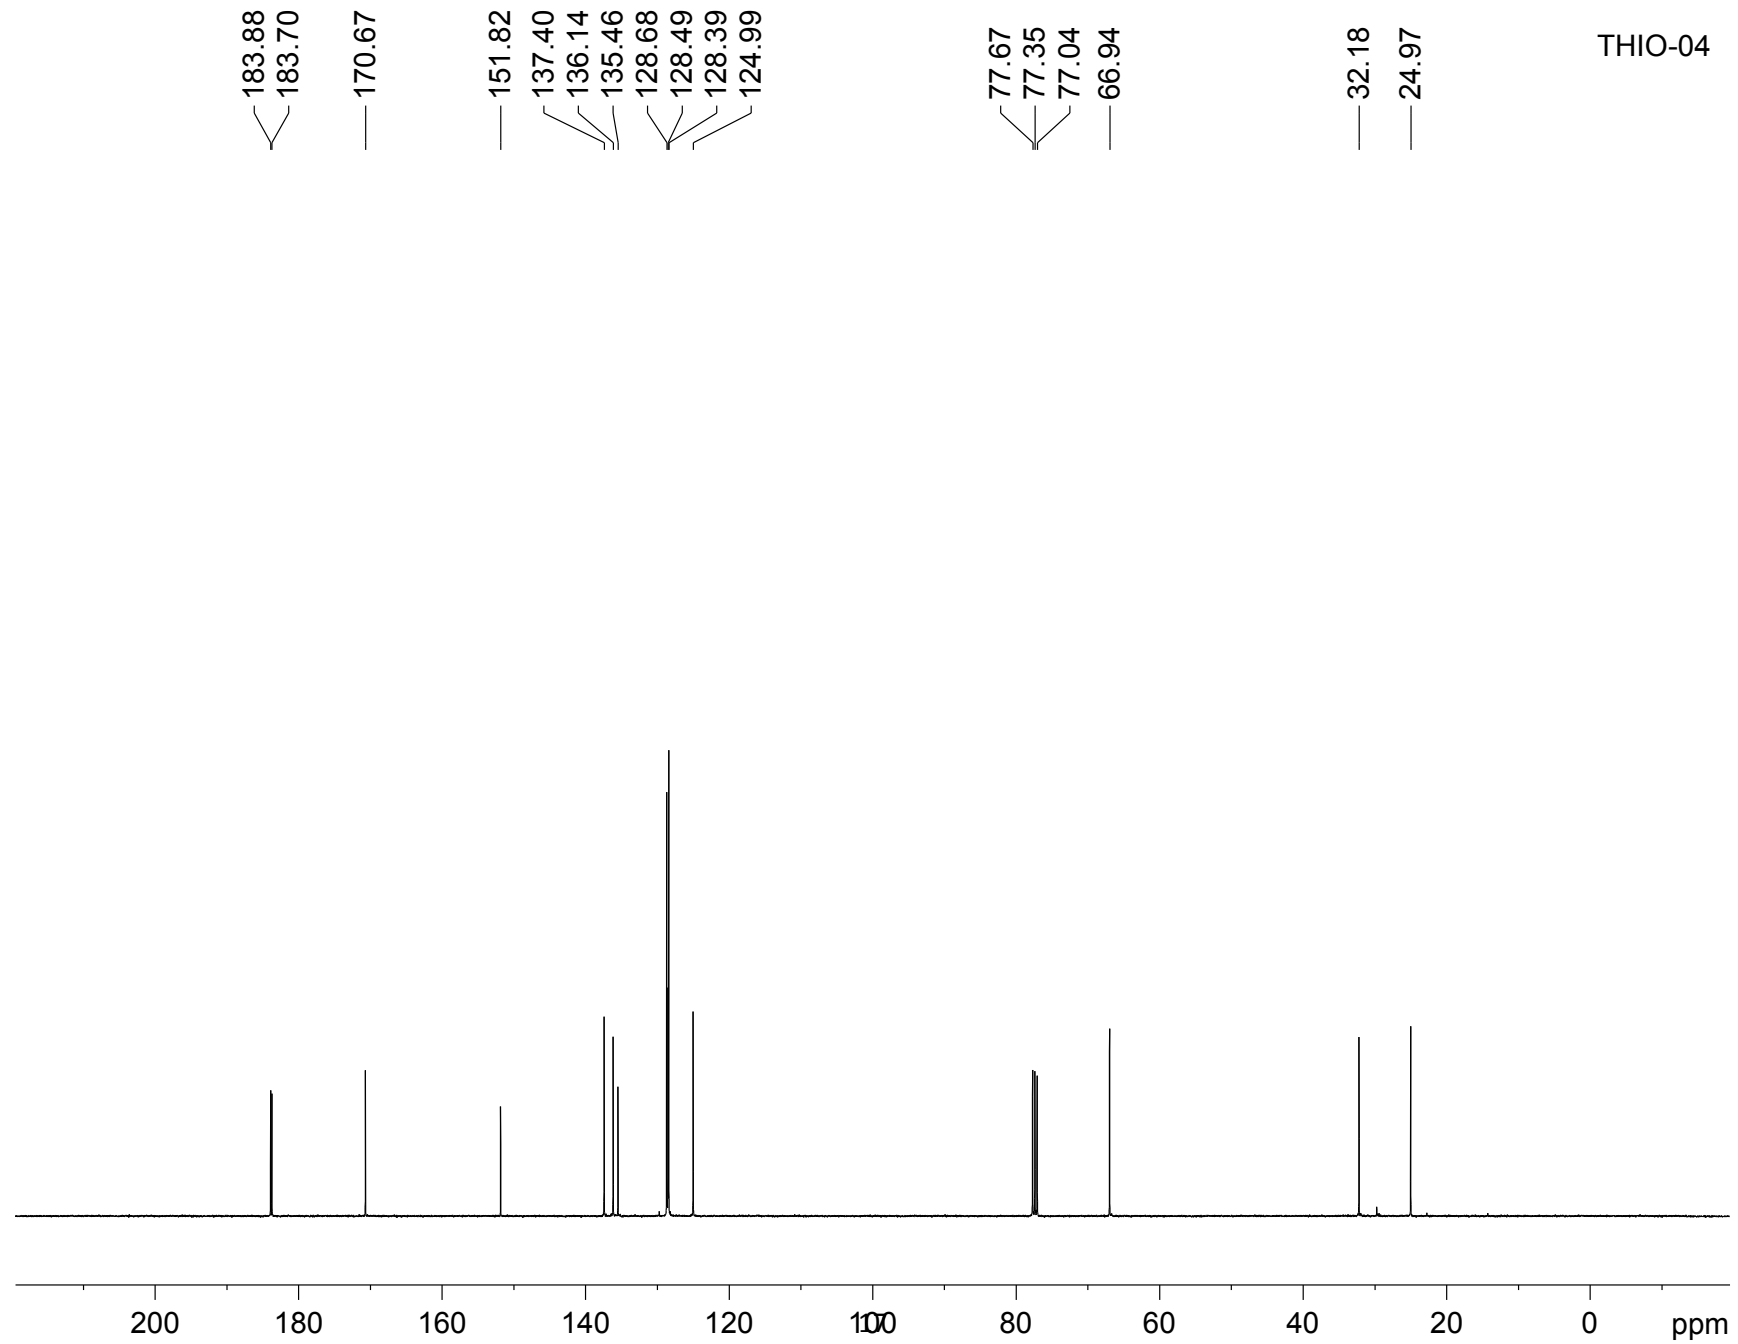

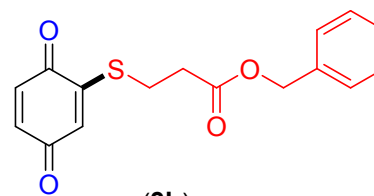

(3h)

Benzyl 3-((3,6-dioxocyclohexa-1,4-dien-1-yl)thio)propanoate

THIO-07

7.297  
7.278  
7.260  
7.199  
7.182  
7.163  
6.802  
6.777  
6.723  
6.698  
6.416

4.164  
4.147  
4.131  
3.051  
3.033  
3.015  
2.716  
2.699  
2.686  
2.668  
1.995  
1.977  
1.959

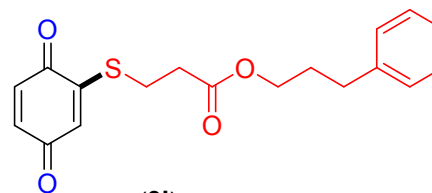

(3i)

3-phenylpropyl 3-((3,6-dioxocyclohexa-1,4-dien-1-yl)thio)propanoate

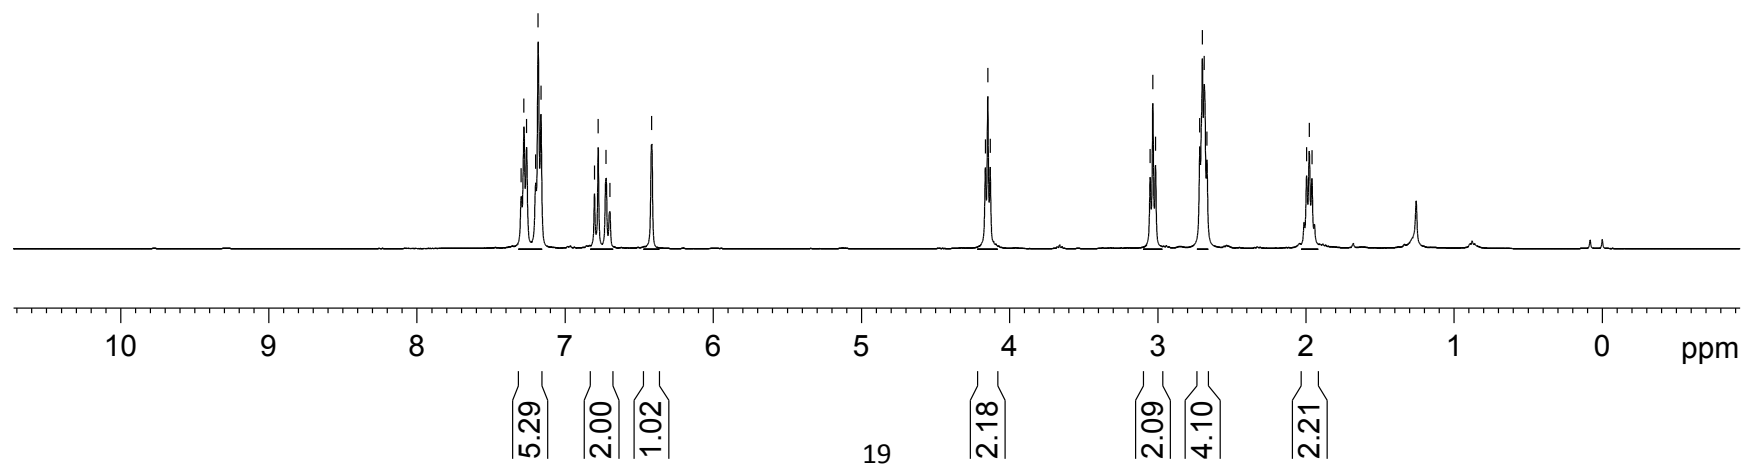

19

183.88  
183.68

170.77

151.98

141.03

137.45

136.19

128.51

126.11

124.99

77.49

77.18

76.86

64.67

32.21

32.17

30.06

25.08

THIO-07

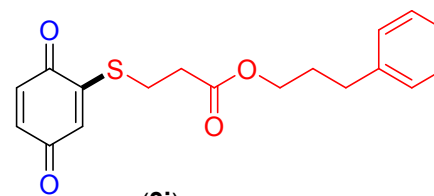

(3i)

3-phenylpropyl 3-((3,6-dioxocyclohexa-1,4-dien-1-yl)thio)propanoate

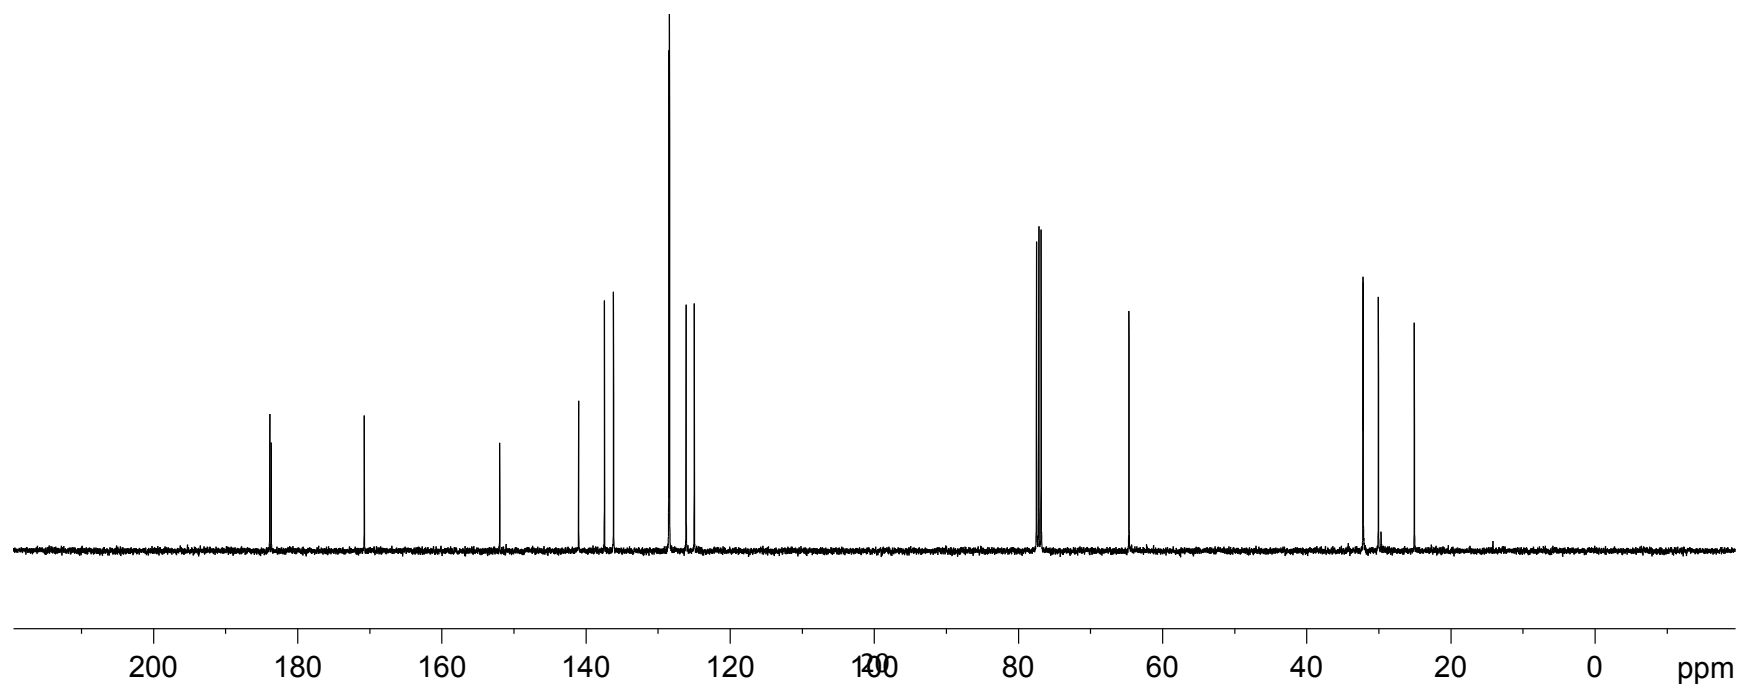

7.619  
7.128  
7.103  
7.047  
7.041  
7.021  
7.016  
6.694

3.102  
3.084  
3.066  
2.063  
2.045  
2.027  
2.008  
1.989  
1.850  
1.832  
1.813  
1.795  
1.776  
1.288  
1.269  
1.251

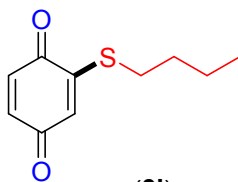

(3)

2-(butylthio)cyclohexa-2,5-diene-1,4-dione

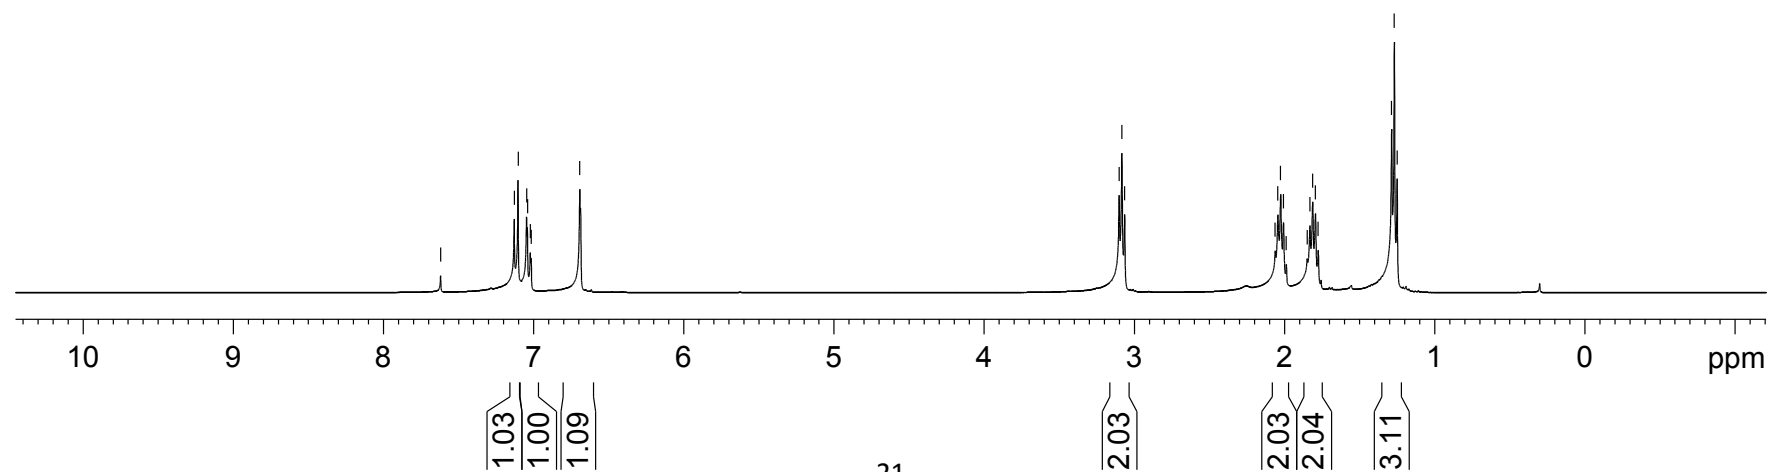

183.99  
183.88

153.15

137.46  
136.17

124.73

77.47  
77.15  
76.83

30.14  
29.24  
22.17  
13.56

THIO-10

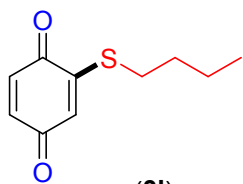

(3I)

2-(butylthio)cyclohexa-2,5-diene-1,4-dione

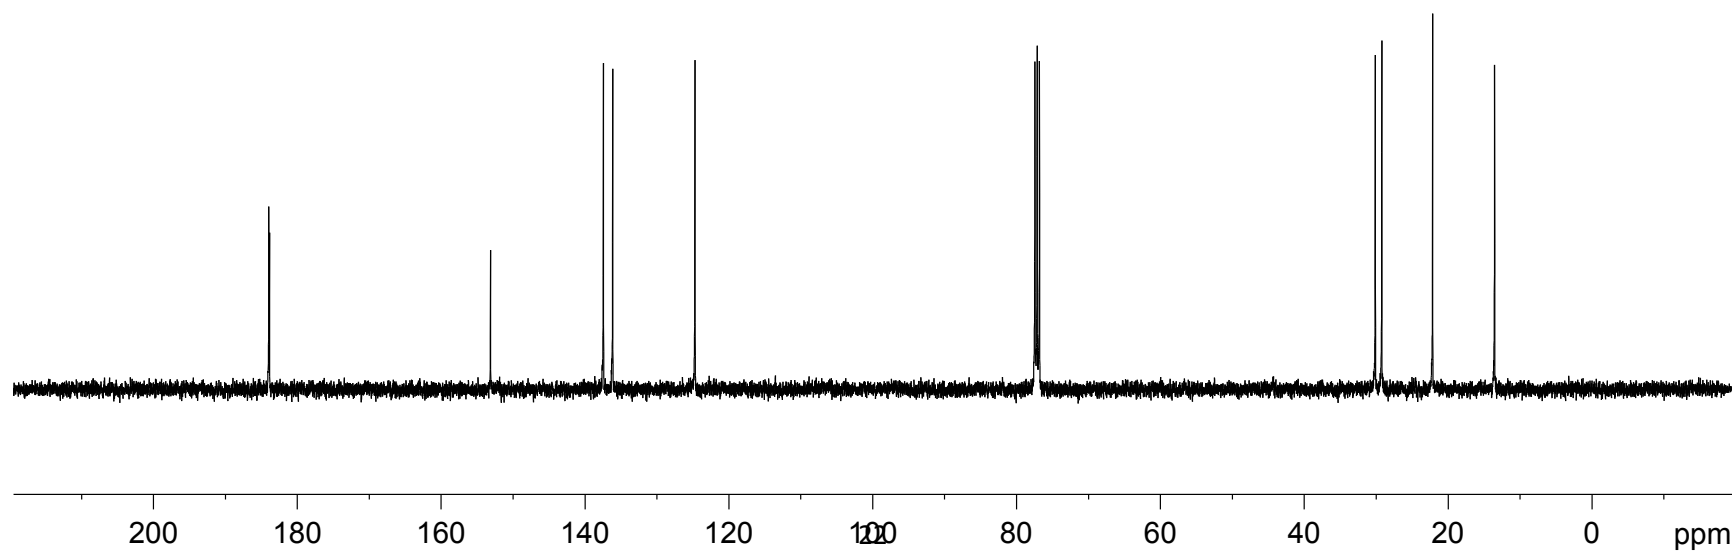

THIO-11

7.498  
7.267  
6.840  
6.814  
6.697  
6.691  
6.671  
6.665  
5.889  
5.883

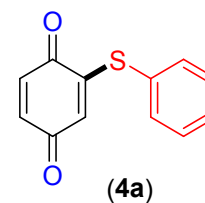

2-(phenylthio)cyclohexa-2,5-diene-1,4-dione

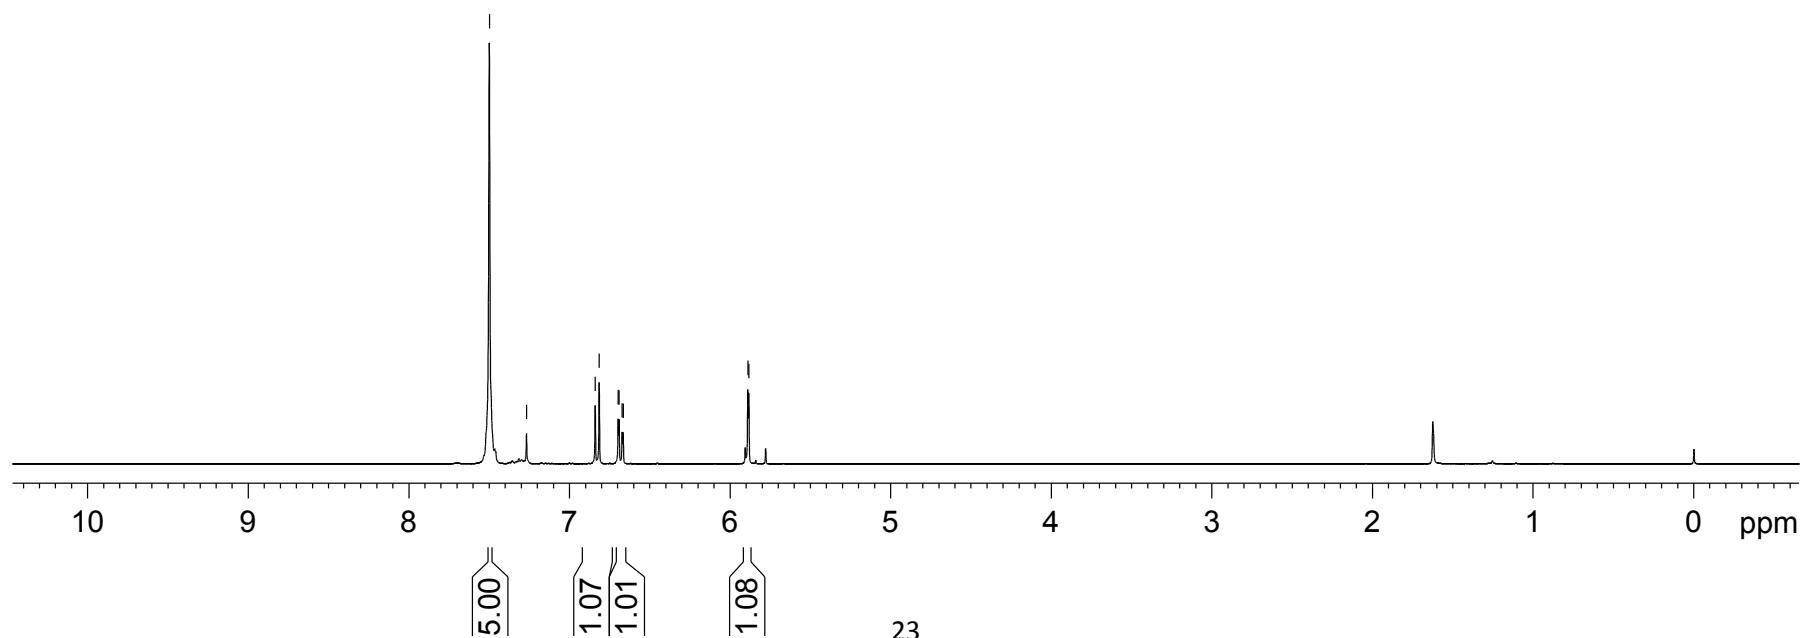

THIO-11

184.49  
183.98

154.54  
137.49  
135.88  
135.66  
130.65  
130.42  
126.89  
125.91

77.38  
77.07  
76.75

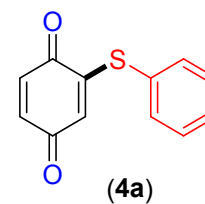

2-(phenylthio)cyclohexa-2,5-diene-1,4-dione

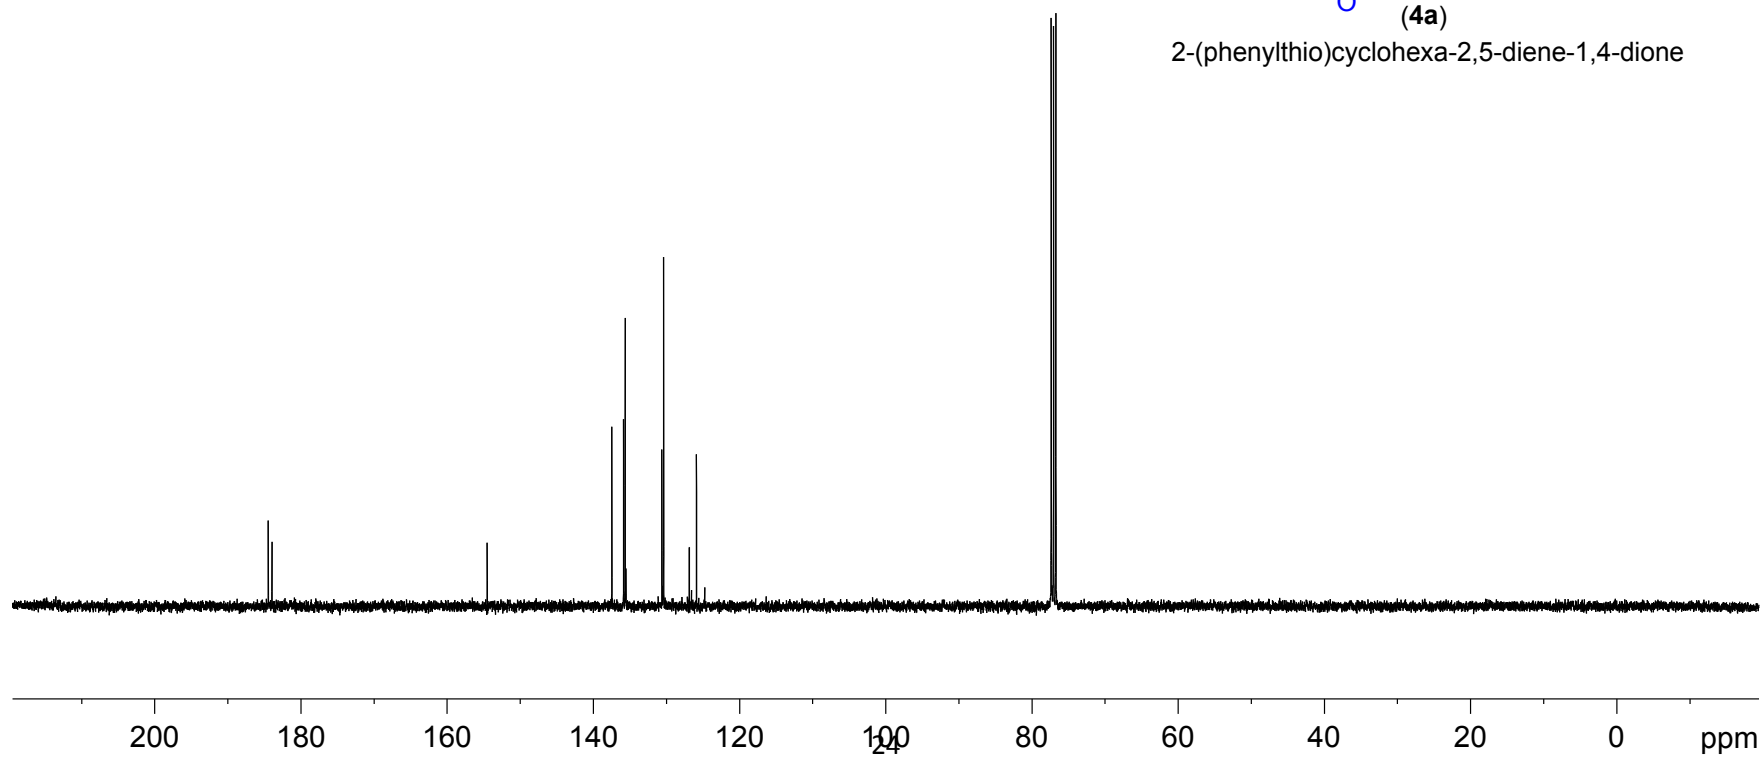



7.380  
7.359  
7.294  
7.274  
6.828  
6.803  
6.687  
6.681  
6.662  
6.656  
5.876  
5.870

— 2.411

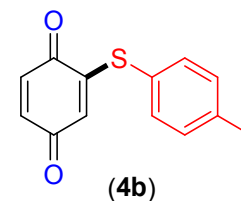

2-(*p*-tolylthio)cyclohexa-2,5-diene-1,4-dione

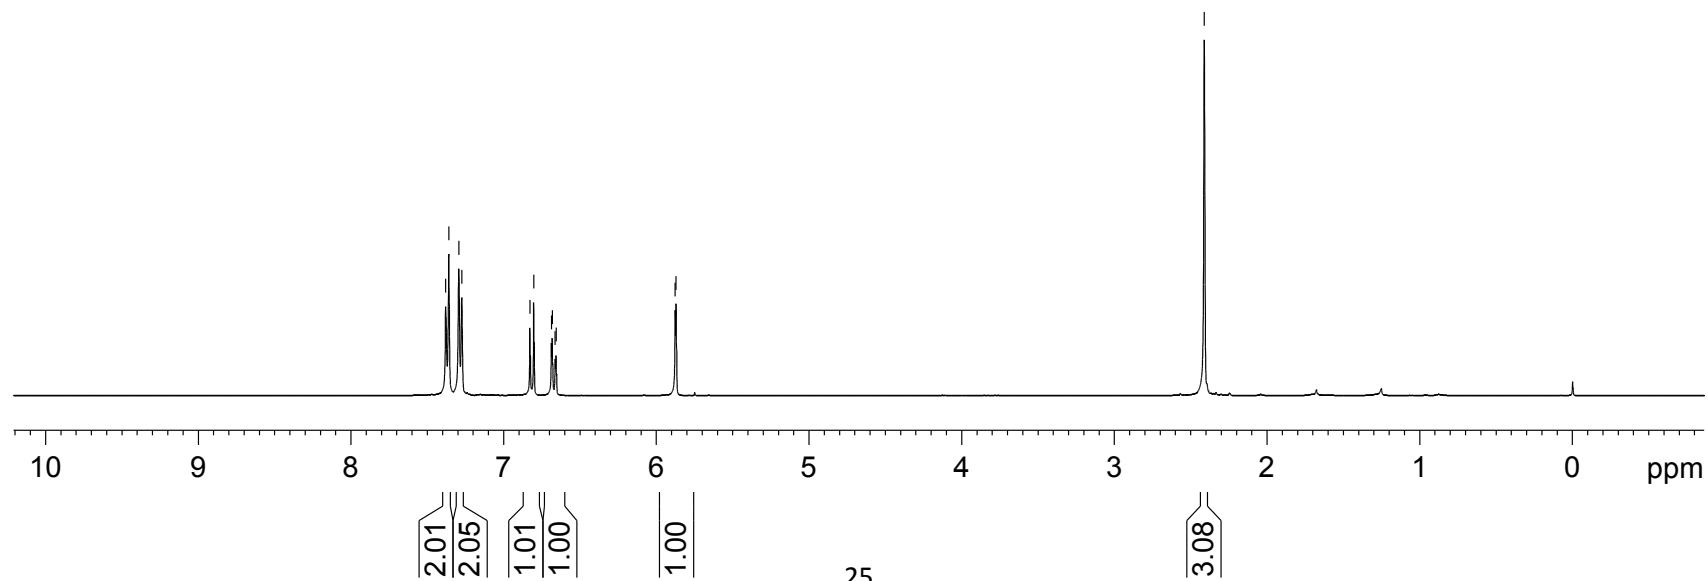

184.55  
184.10

154.94  
141.12  
137.48  
135.89  
135.51  
131.21  
125.83  
123.19

77.42  
77.10  
76.78

21.41

THIO-12

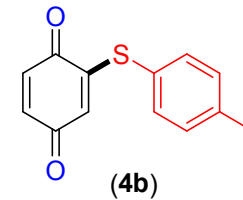

2-(*p*-tolylthio)cyclohexa-2,5-diene-1,4-dione

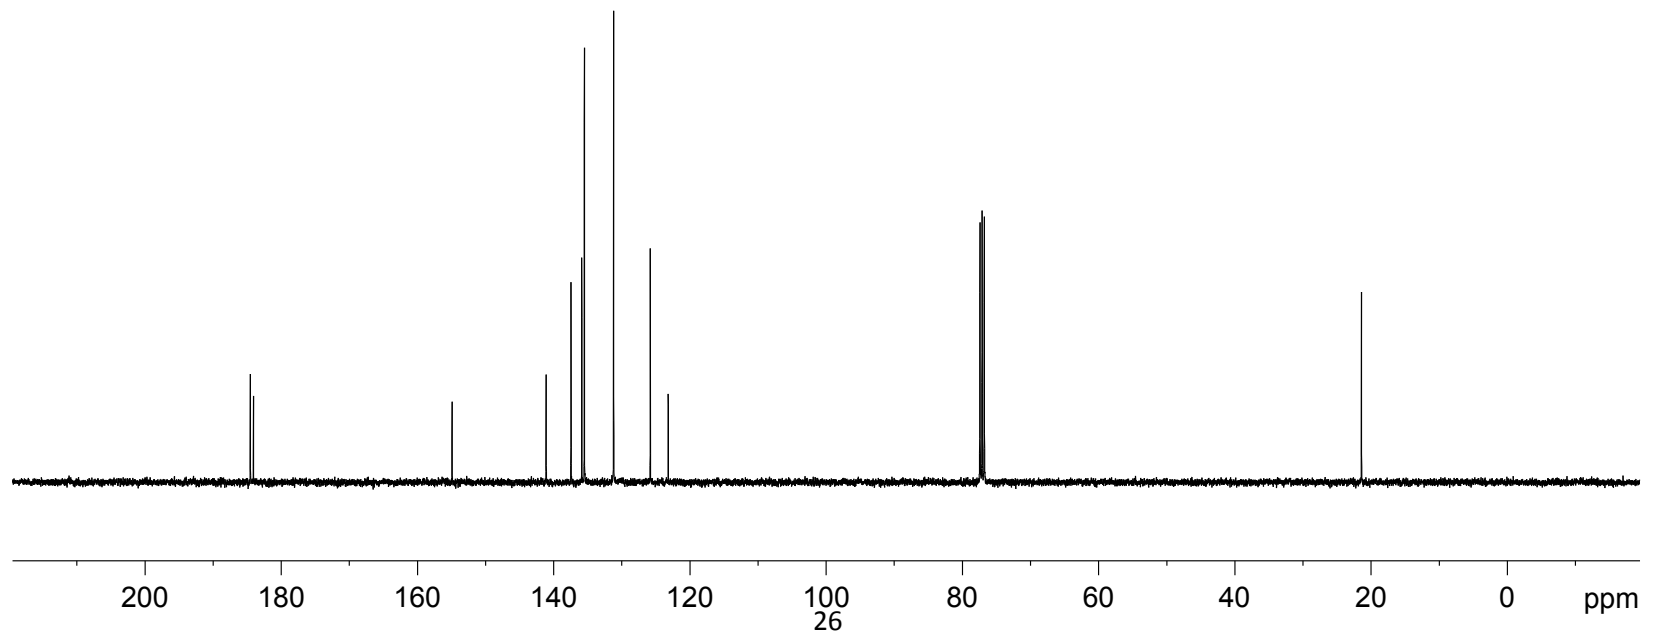

THIO-13

7.387  
7.365  
7.258  
6.986  
6.964  
6.803  
6.778  
6.666  
6.660  
6.641  
6.635  
5.844

3.837

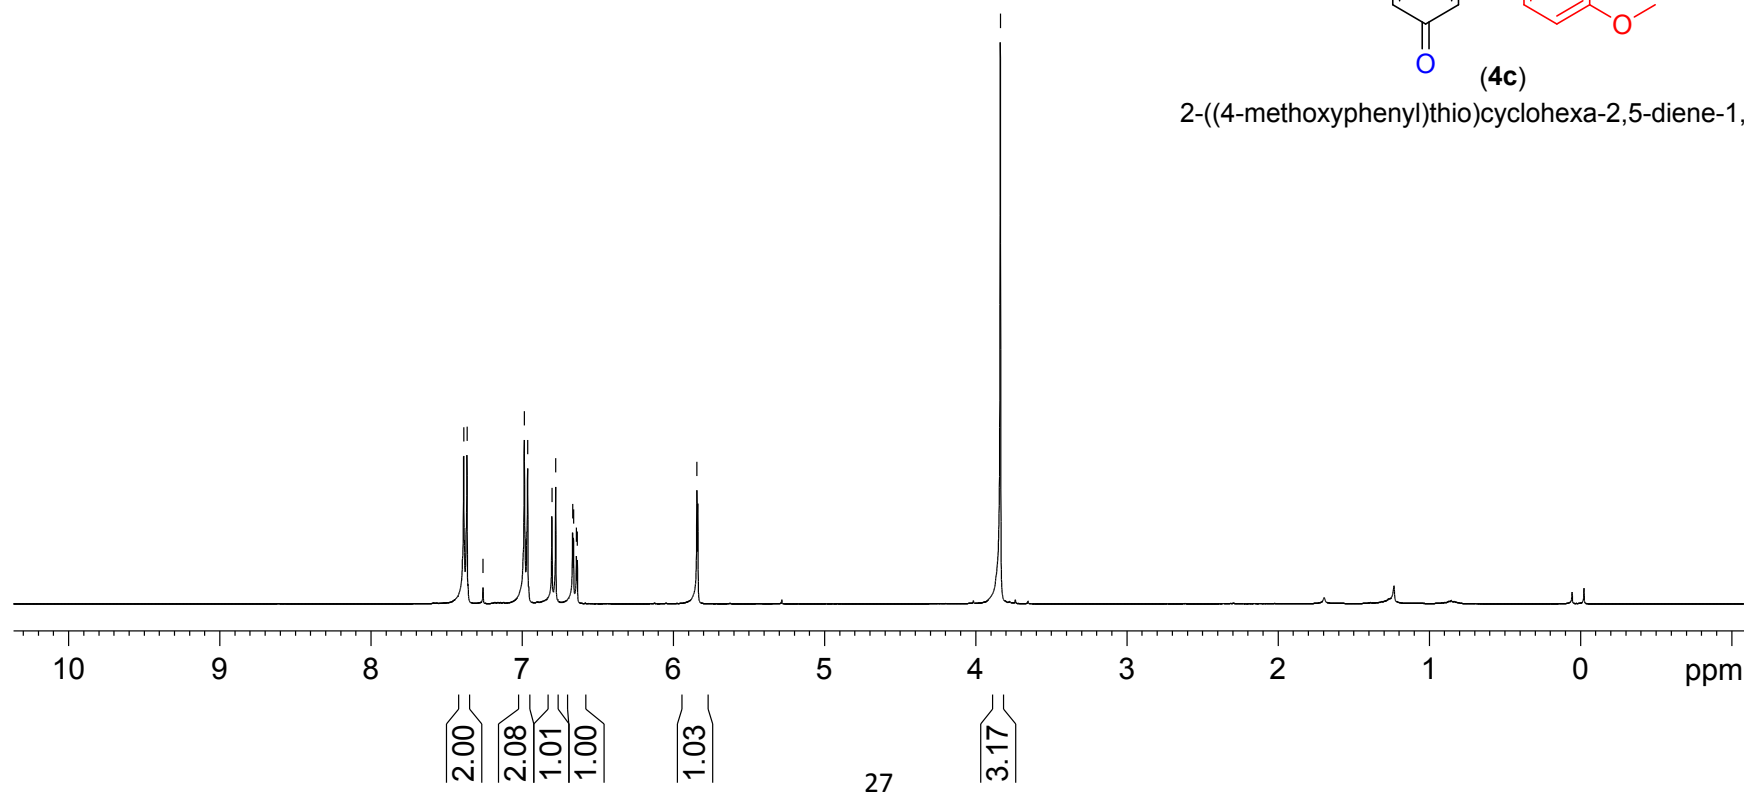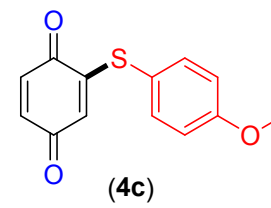

2-((4-methoxyphenyl)thio)cyclohexa-2,5-diene-1,4-dione

184.56  
184.19

161.52  
155.30

137.48  
137.13  
135.90  
125.83  
116.97  
116.03

77.42  
77.11  
76.79

55.52

THIO-13

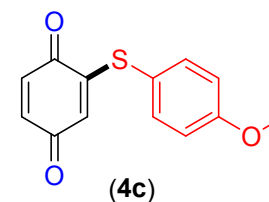

(4c)

2-((4-methoxyphenyl)thio)cyclohexa-2,5-diene-1,4-dione

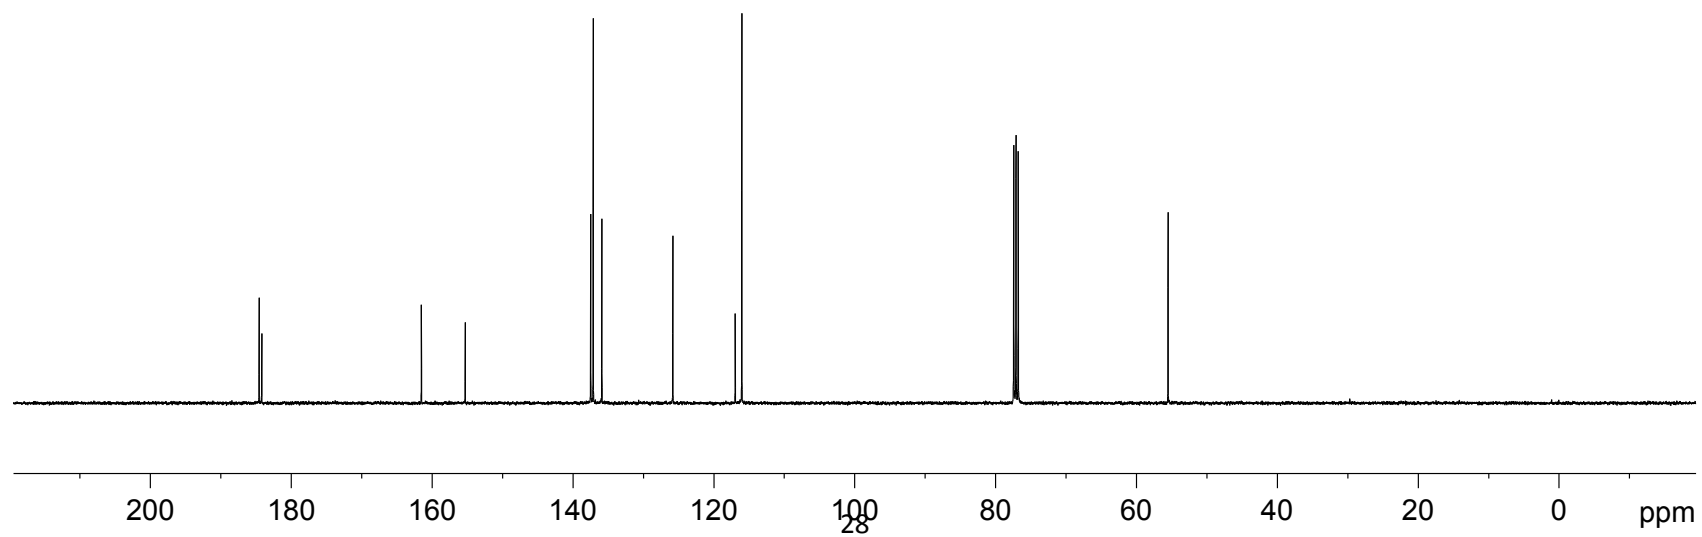

8.351  
8.331  
7.741  
7.720  
7.272  
6.893  
6.868  
6.755  
6.731  
5.946

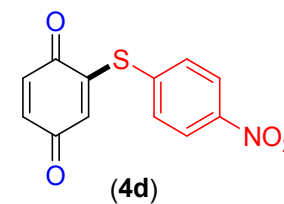

2-((4-nitrophenyl)thio)cyclohexa-2,5-diene-1,4-dione

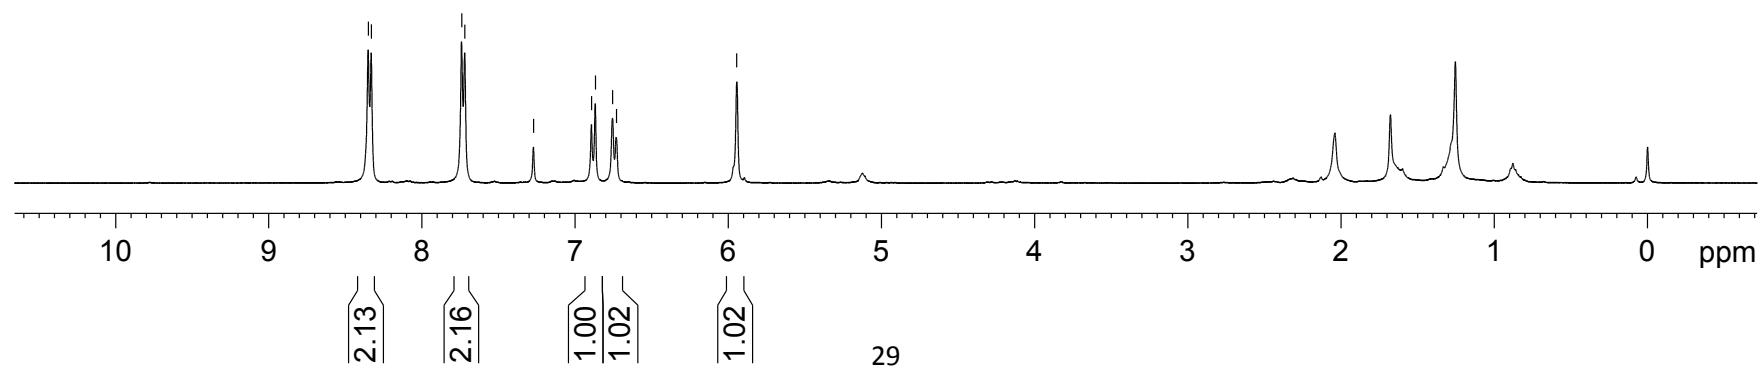

THIO-14

184.07  
183.25

152.31  
149.05  
137.54  
136.35  
135.91  
135.73  
126.67  
125.23  
125.14

77.38  
77.06  
76.75

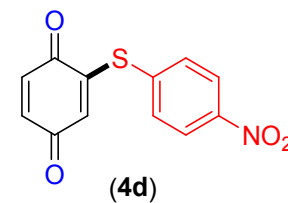

2-((4-nitrophenyl)thio)cyclohexa-2,5-diene-1,4-dione

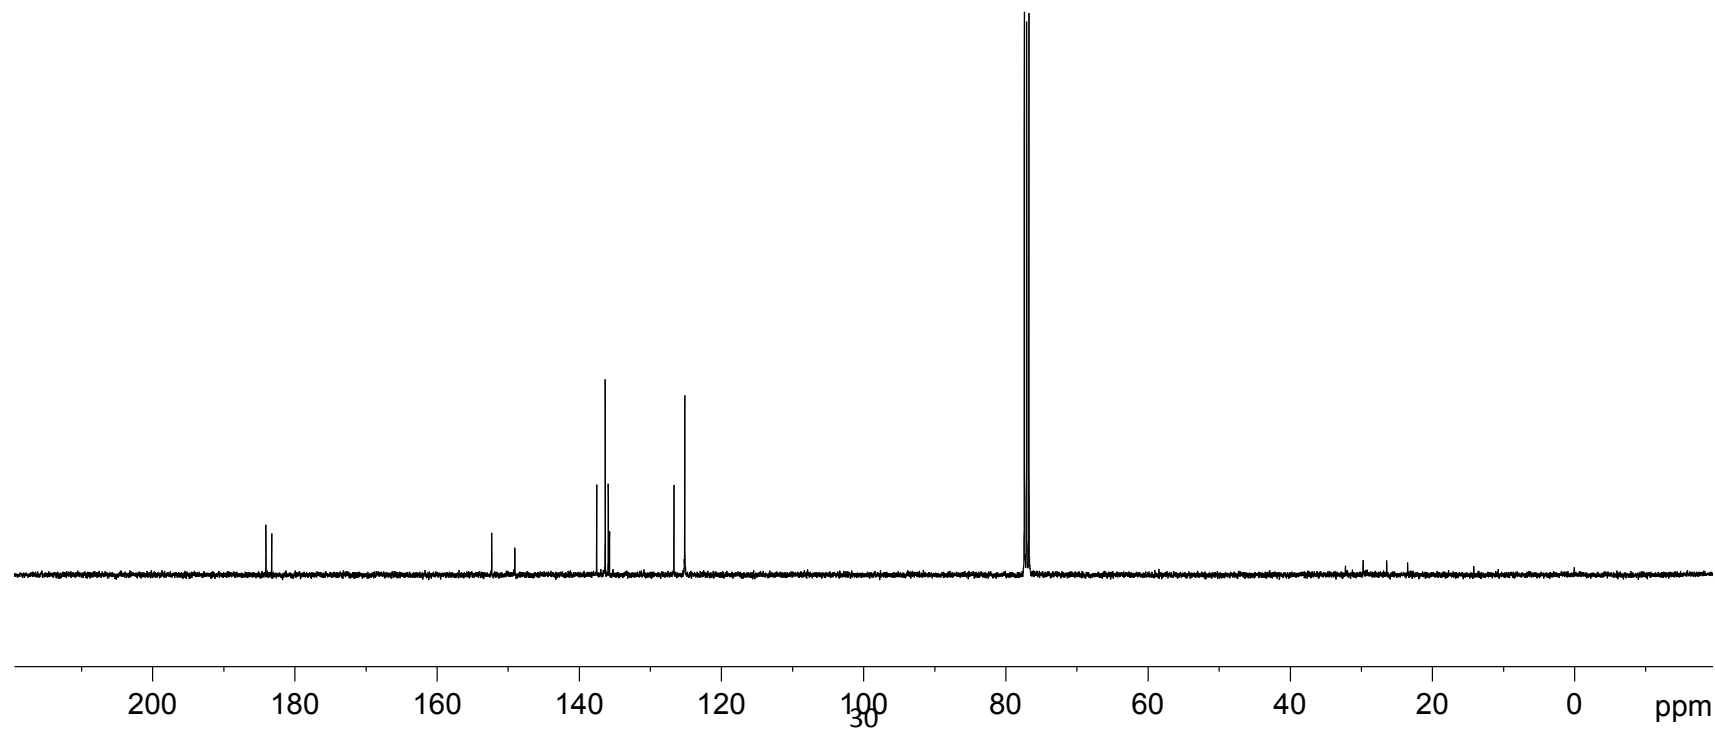

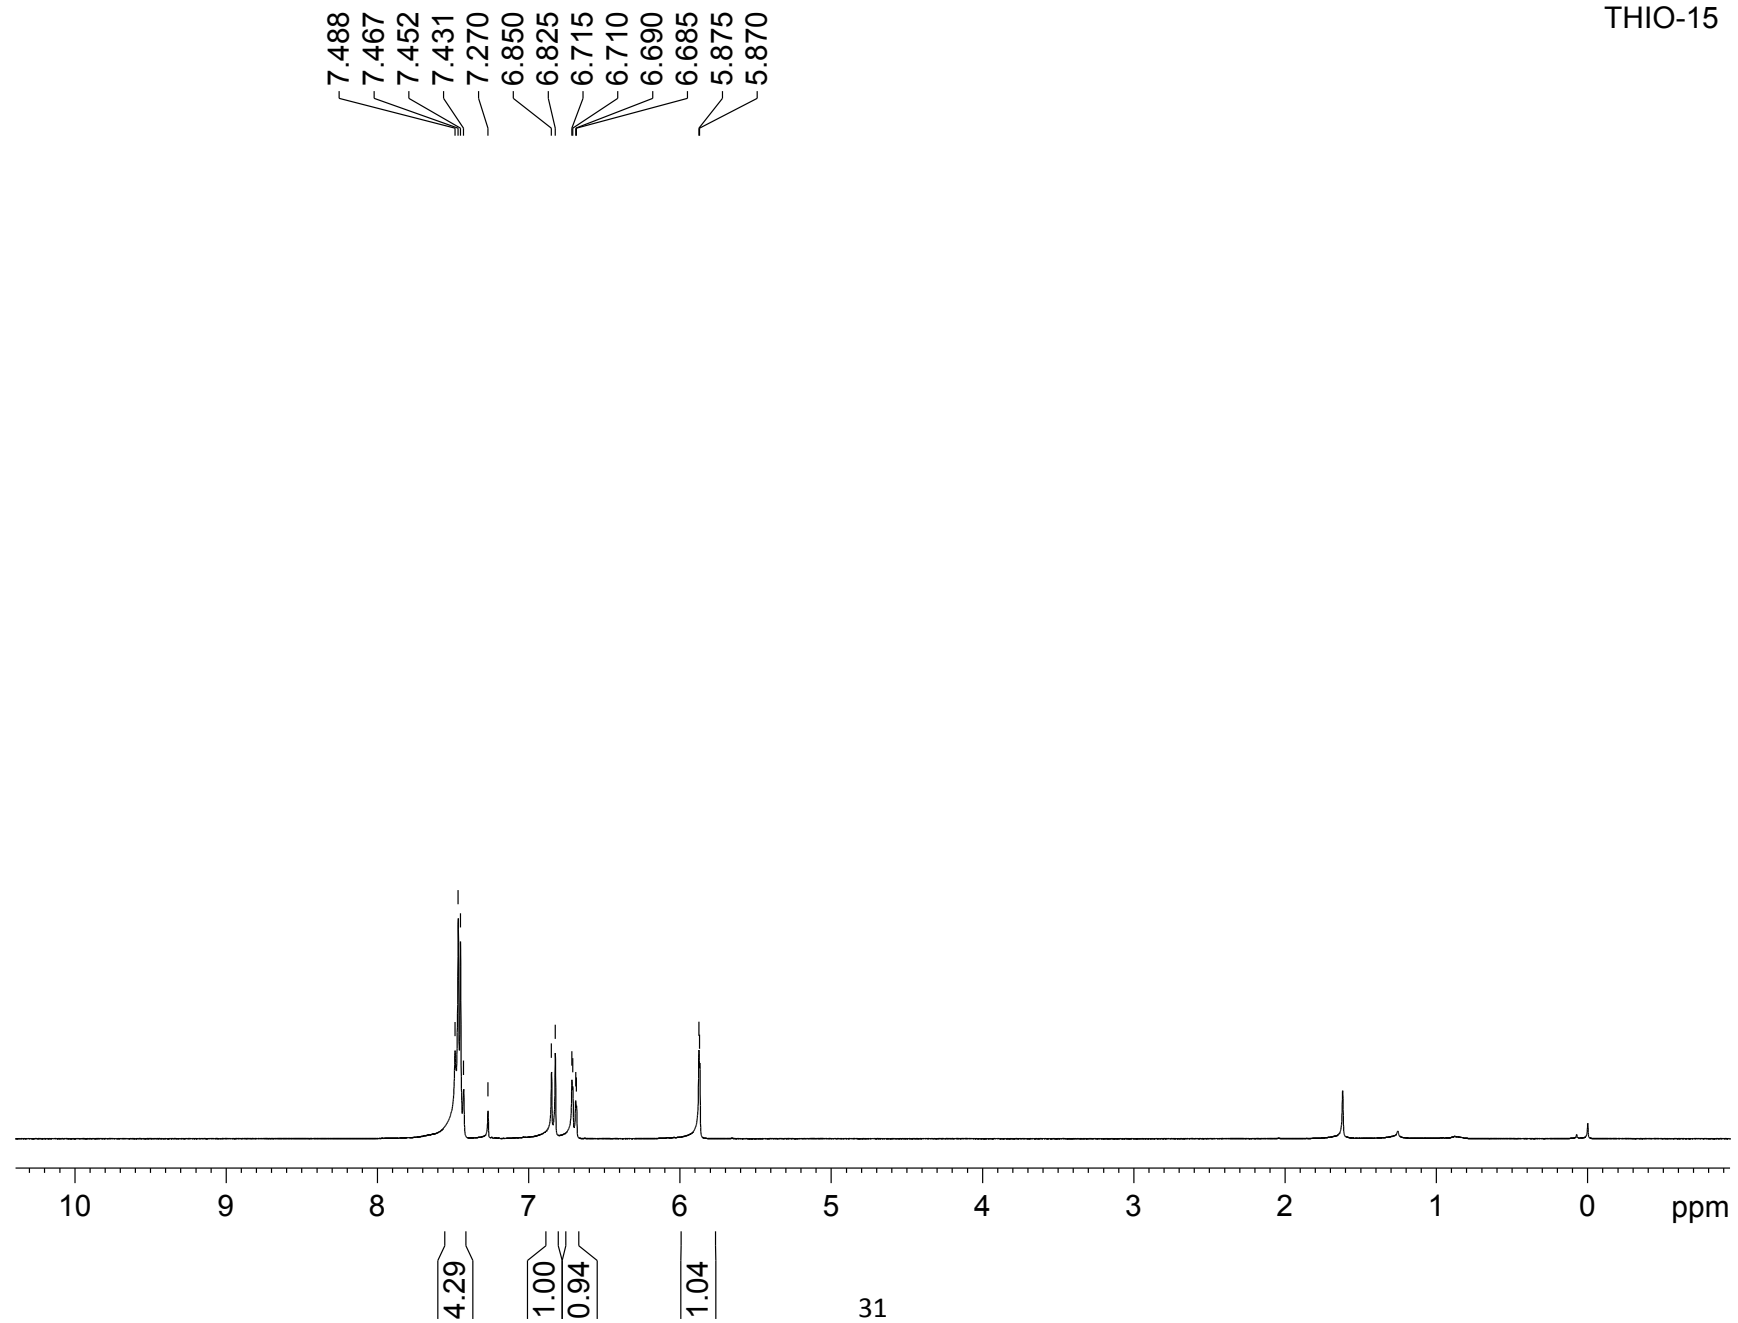

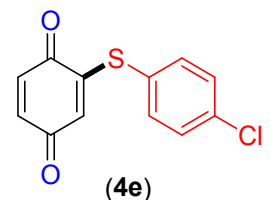

2-((4-chlorophenyl)thio)cyclohexa-2,5-diene-1,4-dione



THIO-15

184.34  
183.78

153.96  
137.51  
137.35  
136.94  
135.88  
130.75  
126.02  
125.32

77.38  
77.07  
76.75

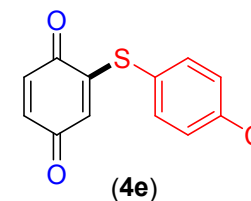

2-((4-chlorophenyl)thio)cyclohexa-2,5-diene-1,4-dione

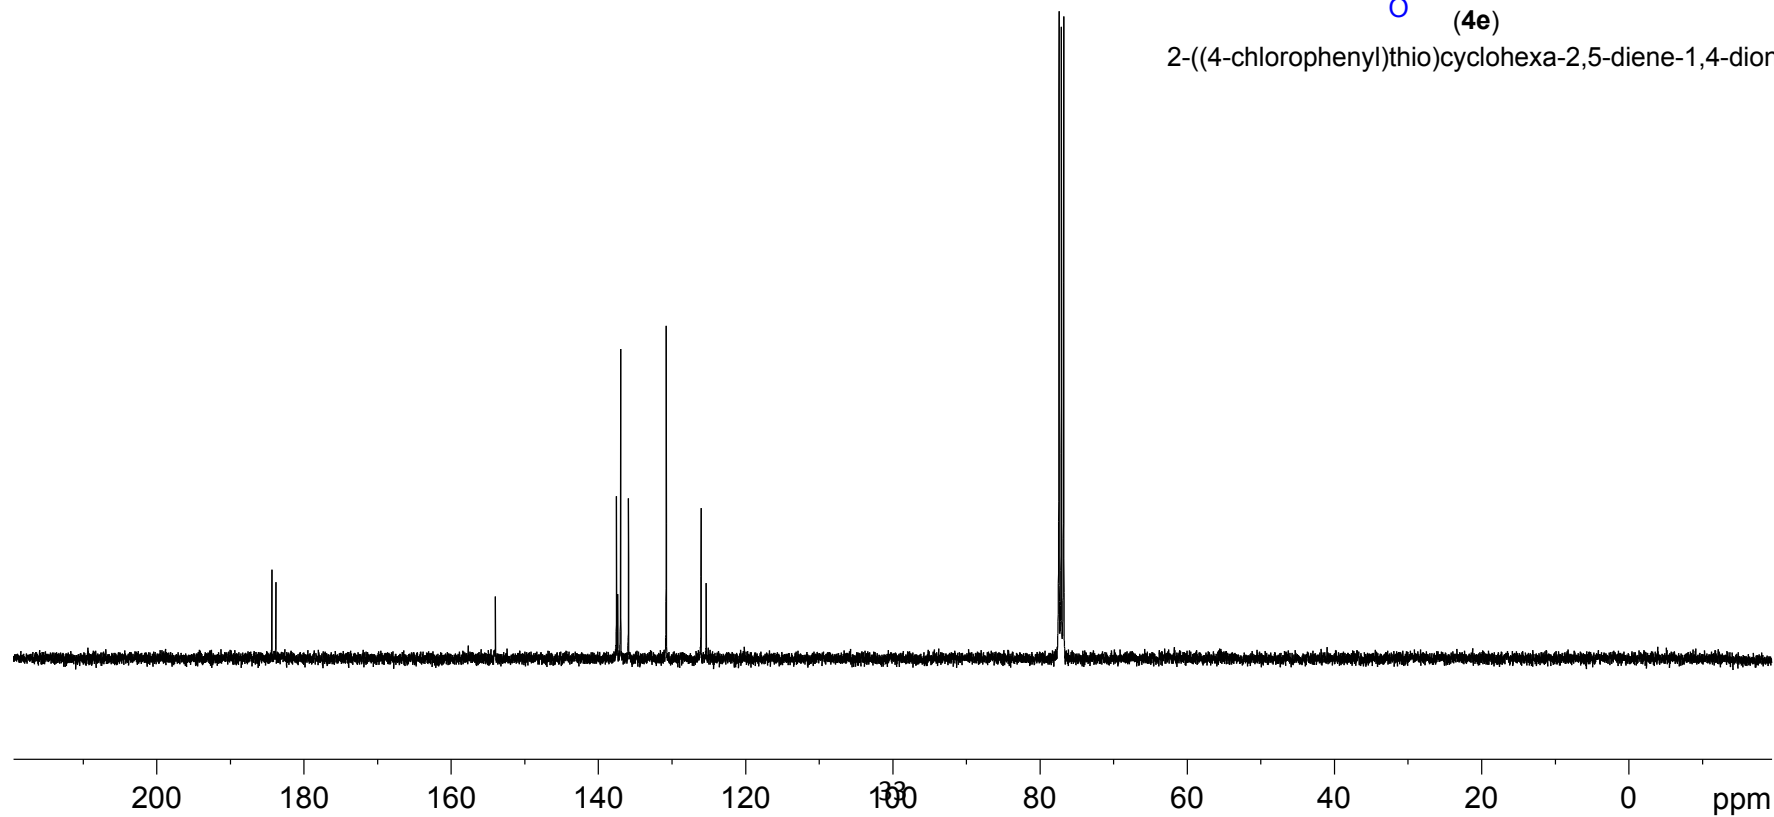

7.647  
7.641  
7.637  
7.624  
7.620  
7.614  
7.389  
7.383  
7.379  
7.367  
7.362  
7.268  
6.849  
6.824  
6.716  
6.710  
6.691  
6.684  
5.881  
5.875

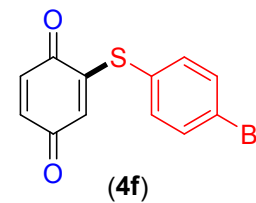

2-((4-bromophenyl)thio)cyclohexa-2,5-diene-1,4-dione

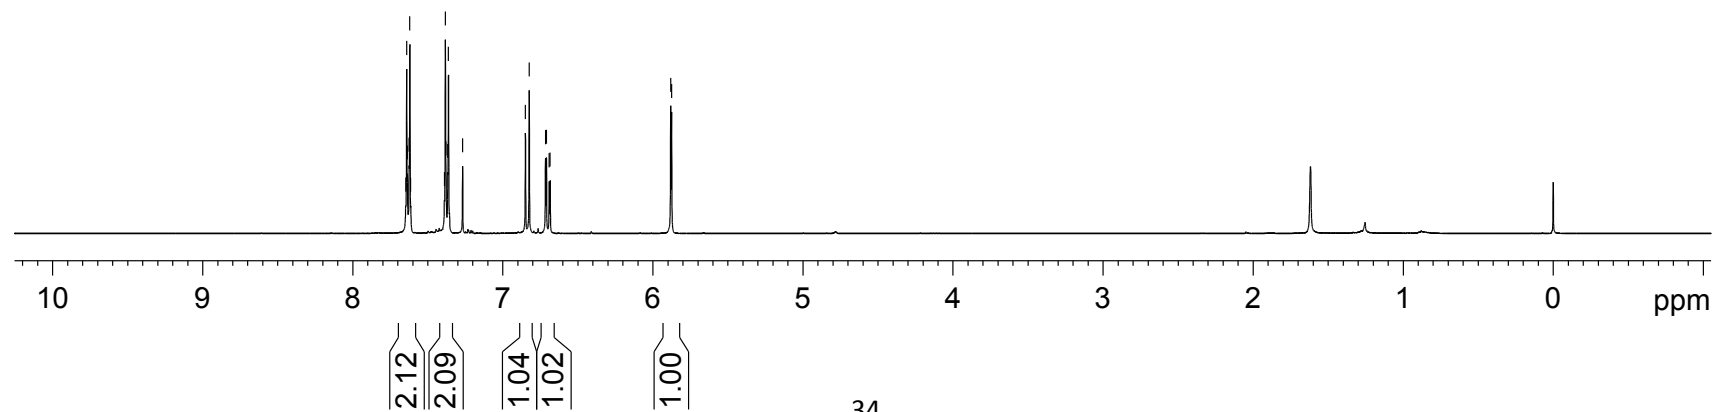

THIO-24

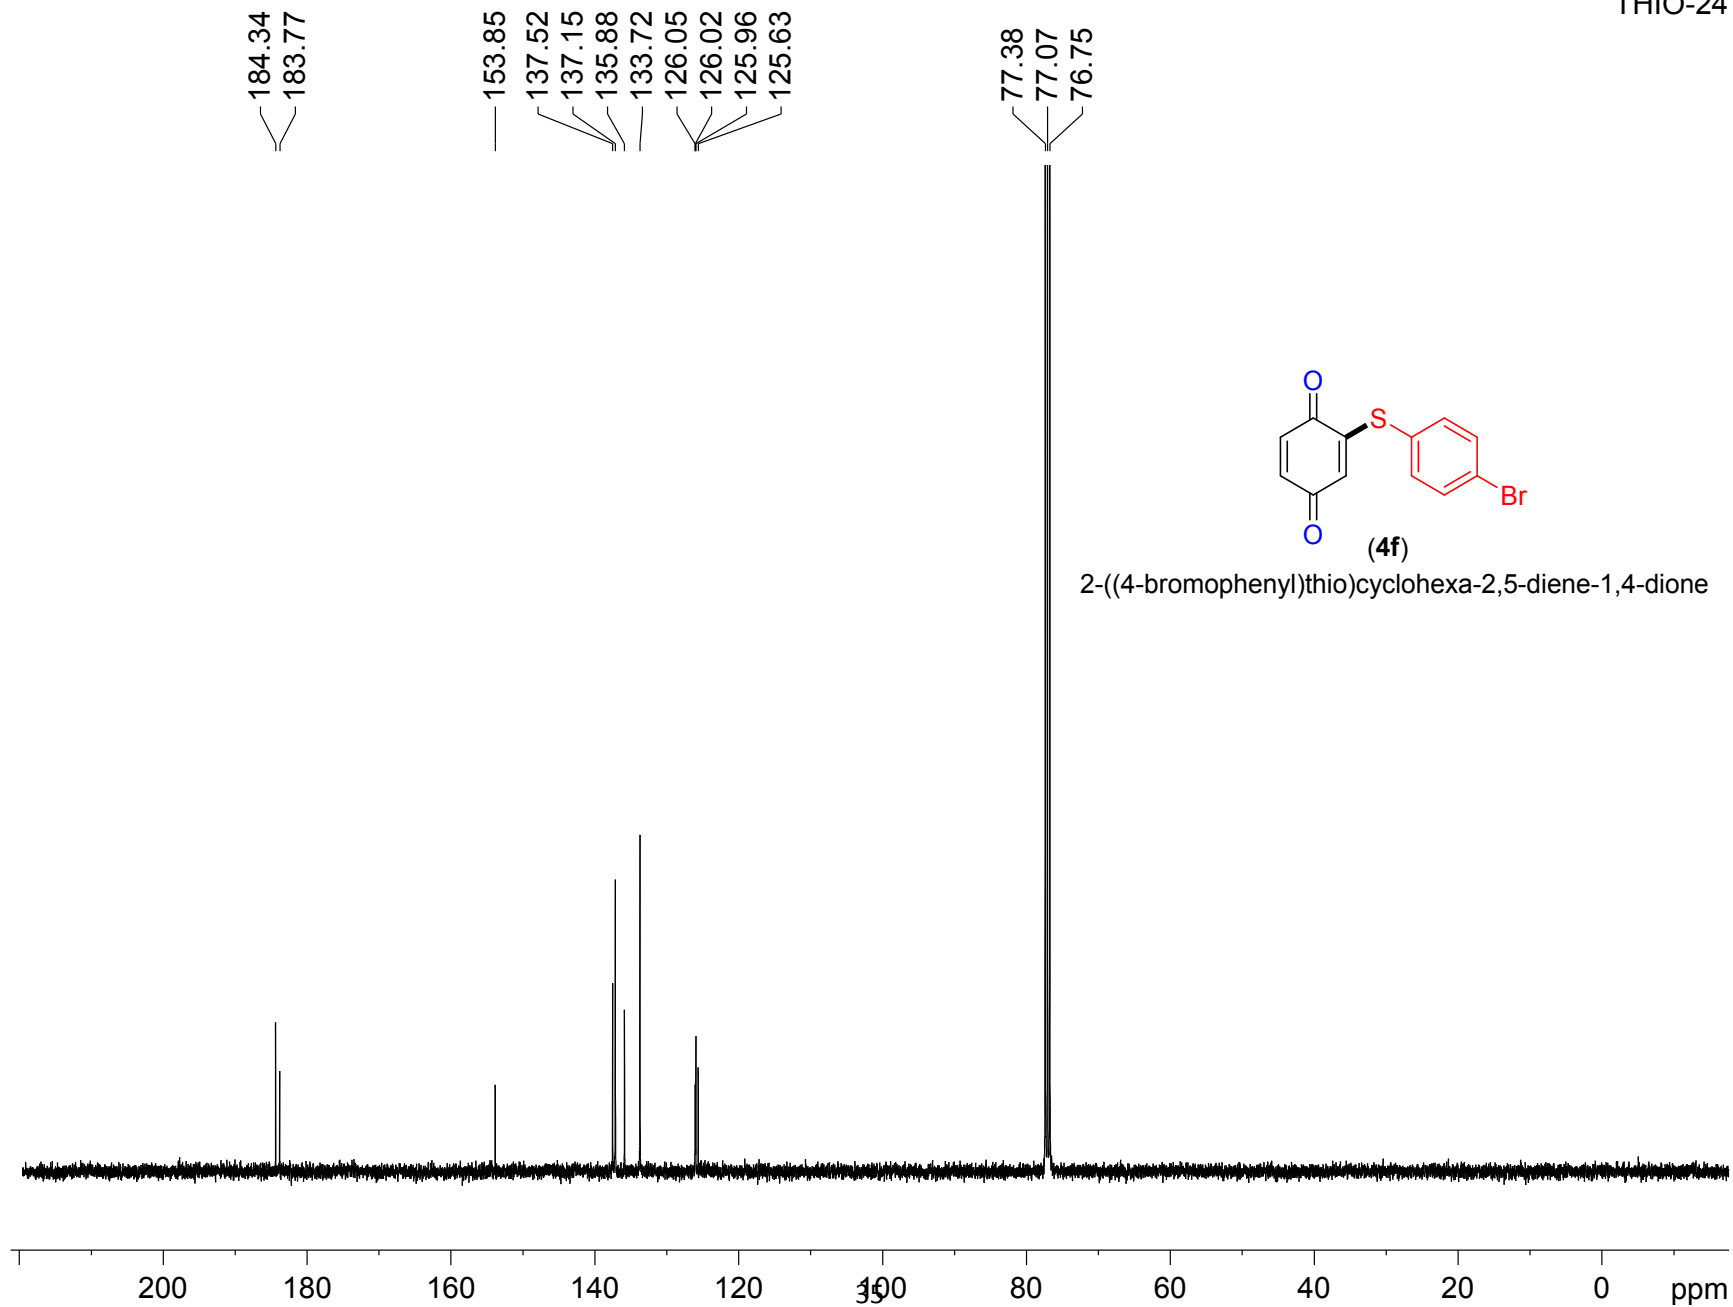

7.515  
7.502  
7.494  
7.481  
7.271  
7.220  
7.199  
7.178  
6.848  
6.823  
6.712  
6.707  
6.687  
6.681  
5.853  
5.847

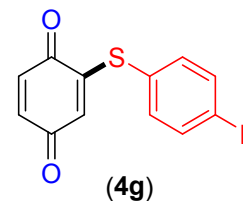

2-((4-fluorophenyl)thio)cyclohexa-2,5-diene-1,4-dione

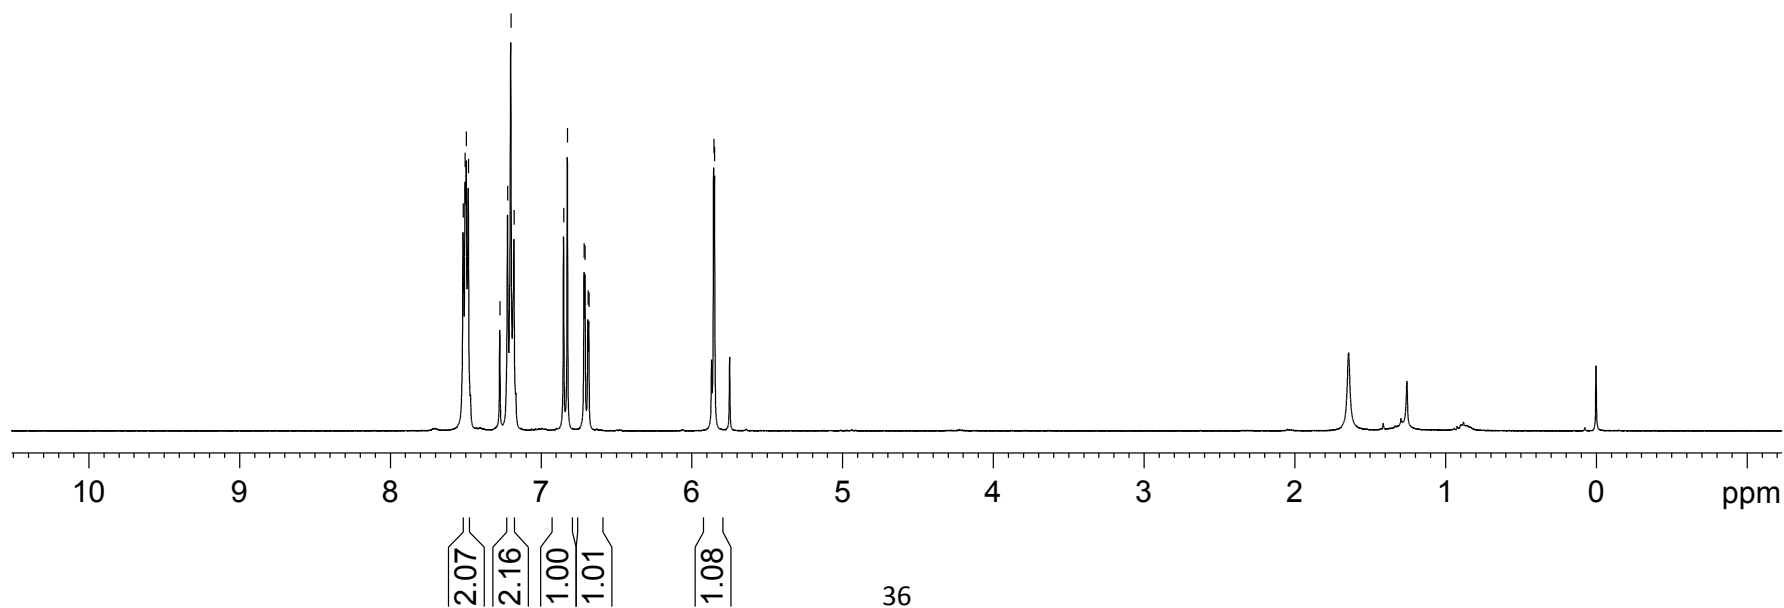

THIO-25

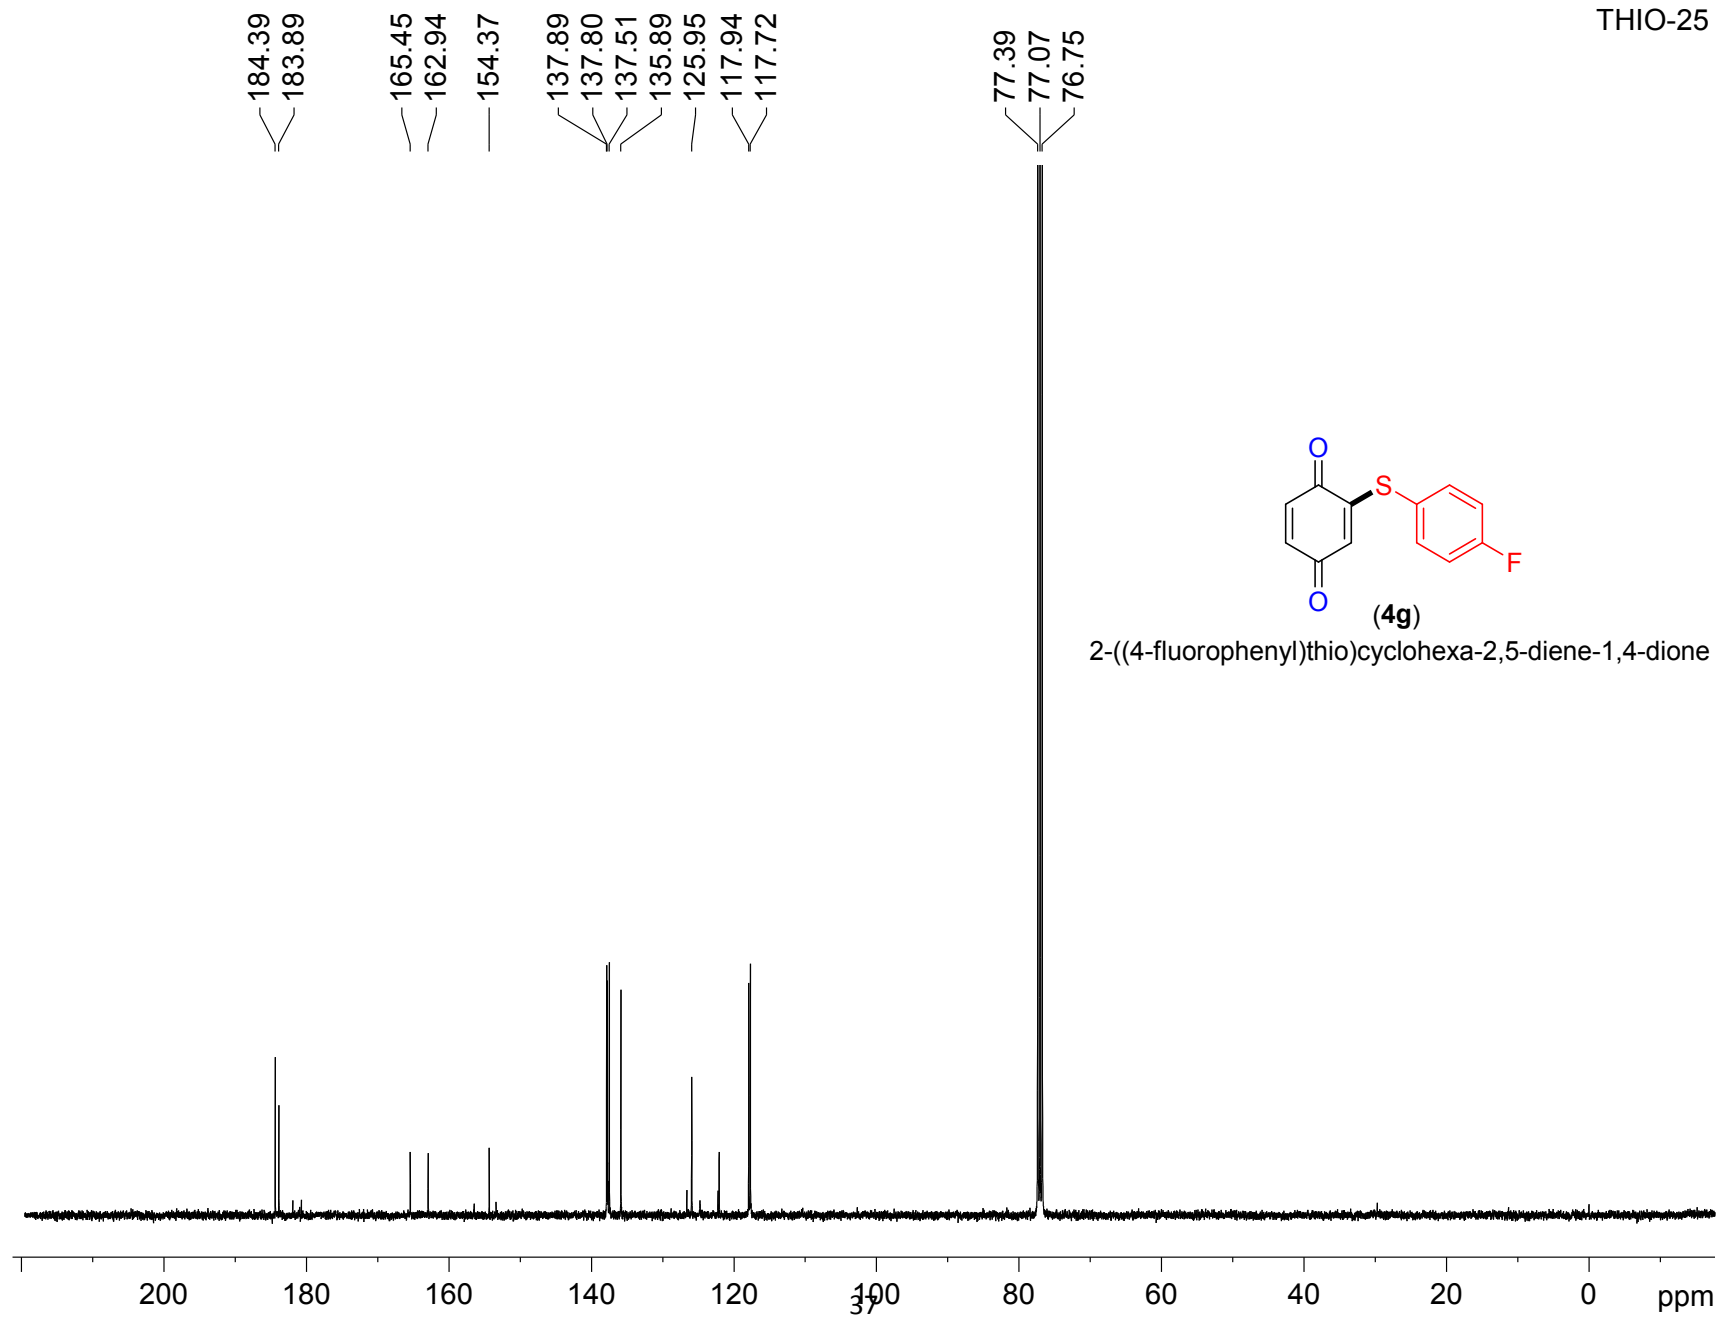

THIO-16

7.375  
7.355  
7.290  
7.270

5.975  
5.783

3.838

2.407

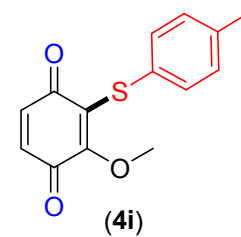

2-methoxy-3-(*p*-tolylthio)cyclohexa-2,5-diene-1,4-dione

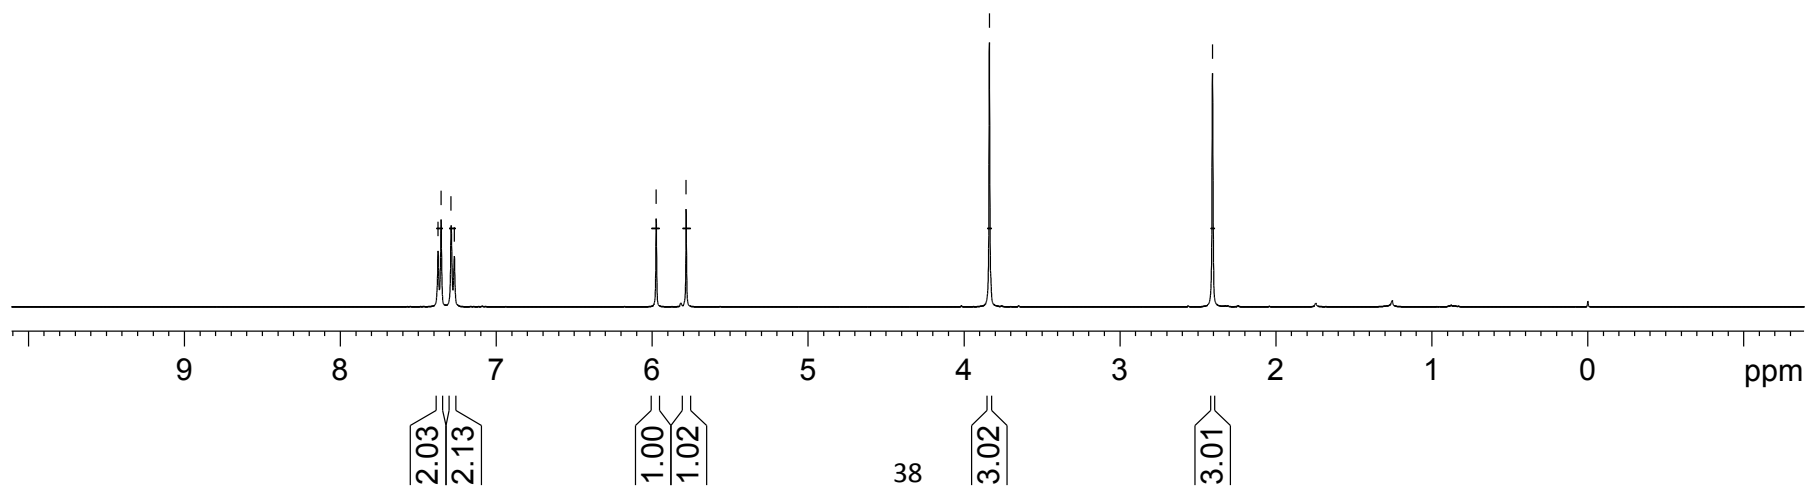

184.88  
184.02  
178.80

159.62  
157.00

141.10  
135.55  
135.39  
131.19  
123.41

107.58  
106.73

77.46  
77.15  
76.83

56.62

21.39

THIO-16

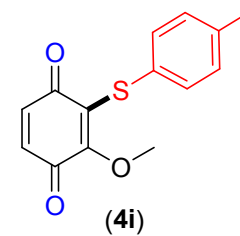

2-methoxy-3-(p-tolylthio)cyclohexa-2,5-diene-1,4-dione

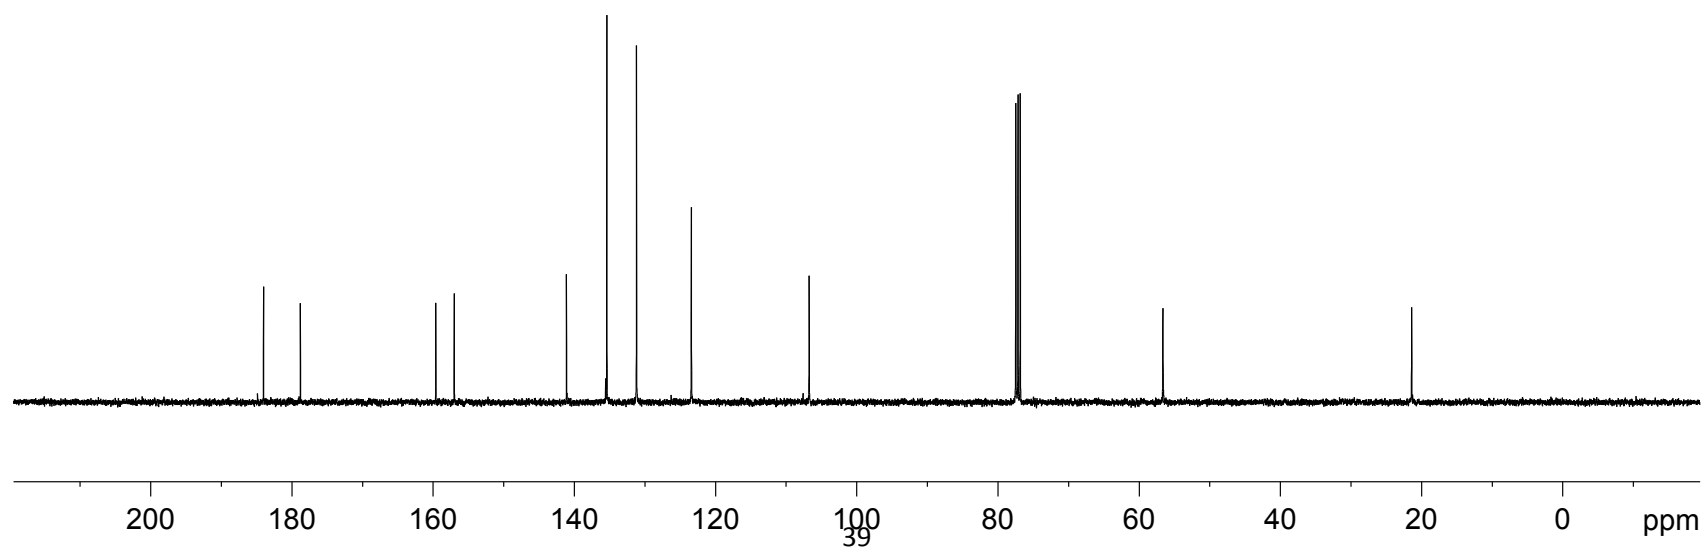

7.345  
7.325  
7.168  
7.148  
6.806  
6.781  
6.730  
6.705

2.351  
2.119

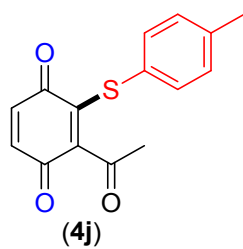

2-acetyl-3-(*p*-tolylthio)cyclohexa-2,5-diene-1,4-dione

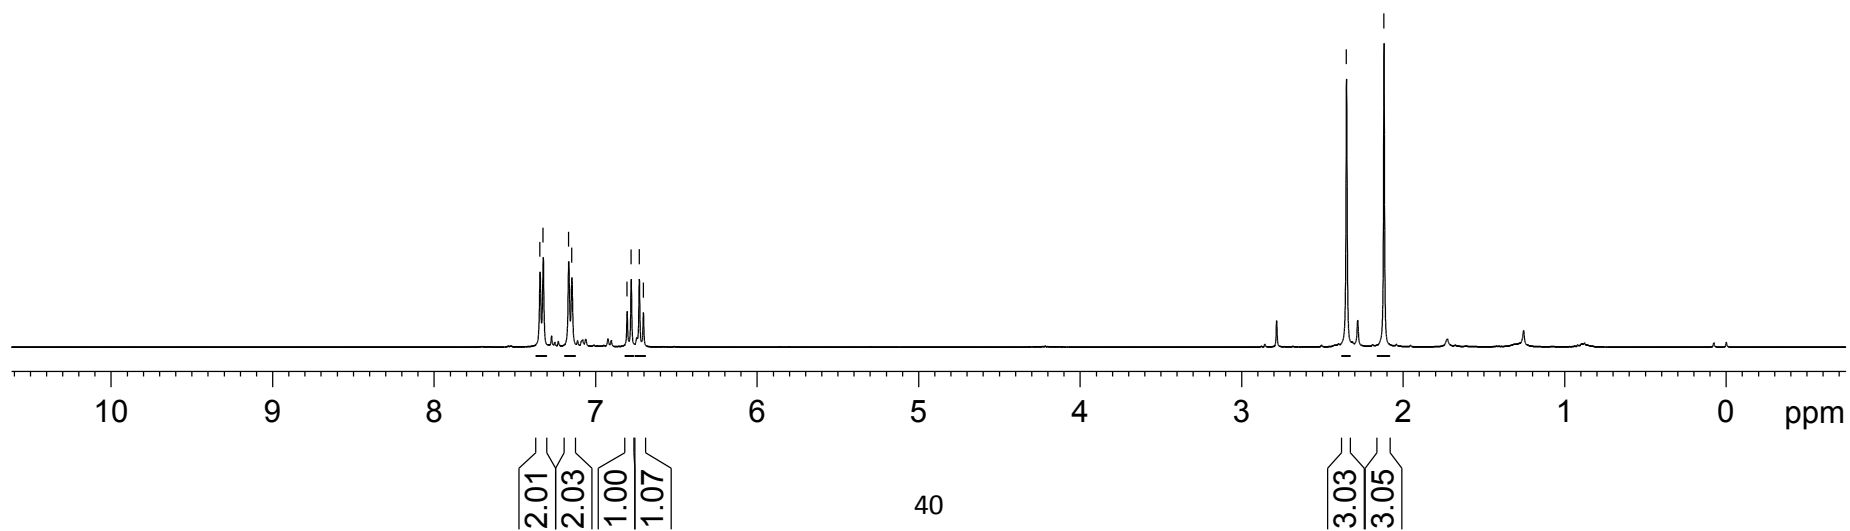



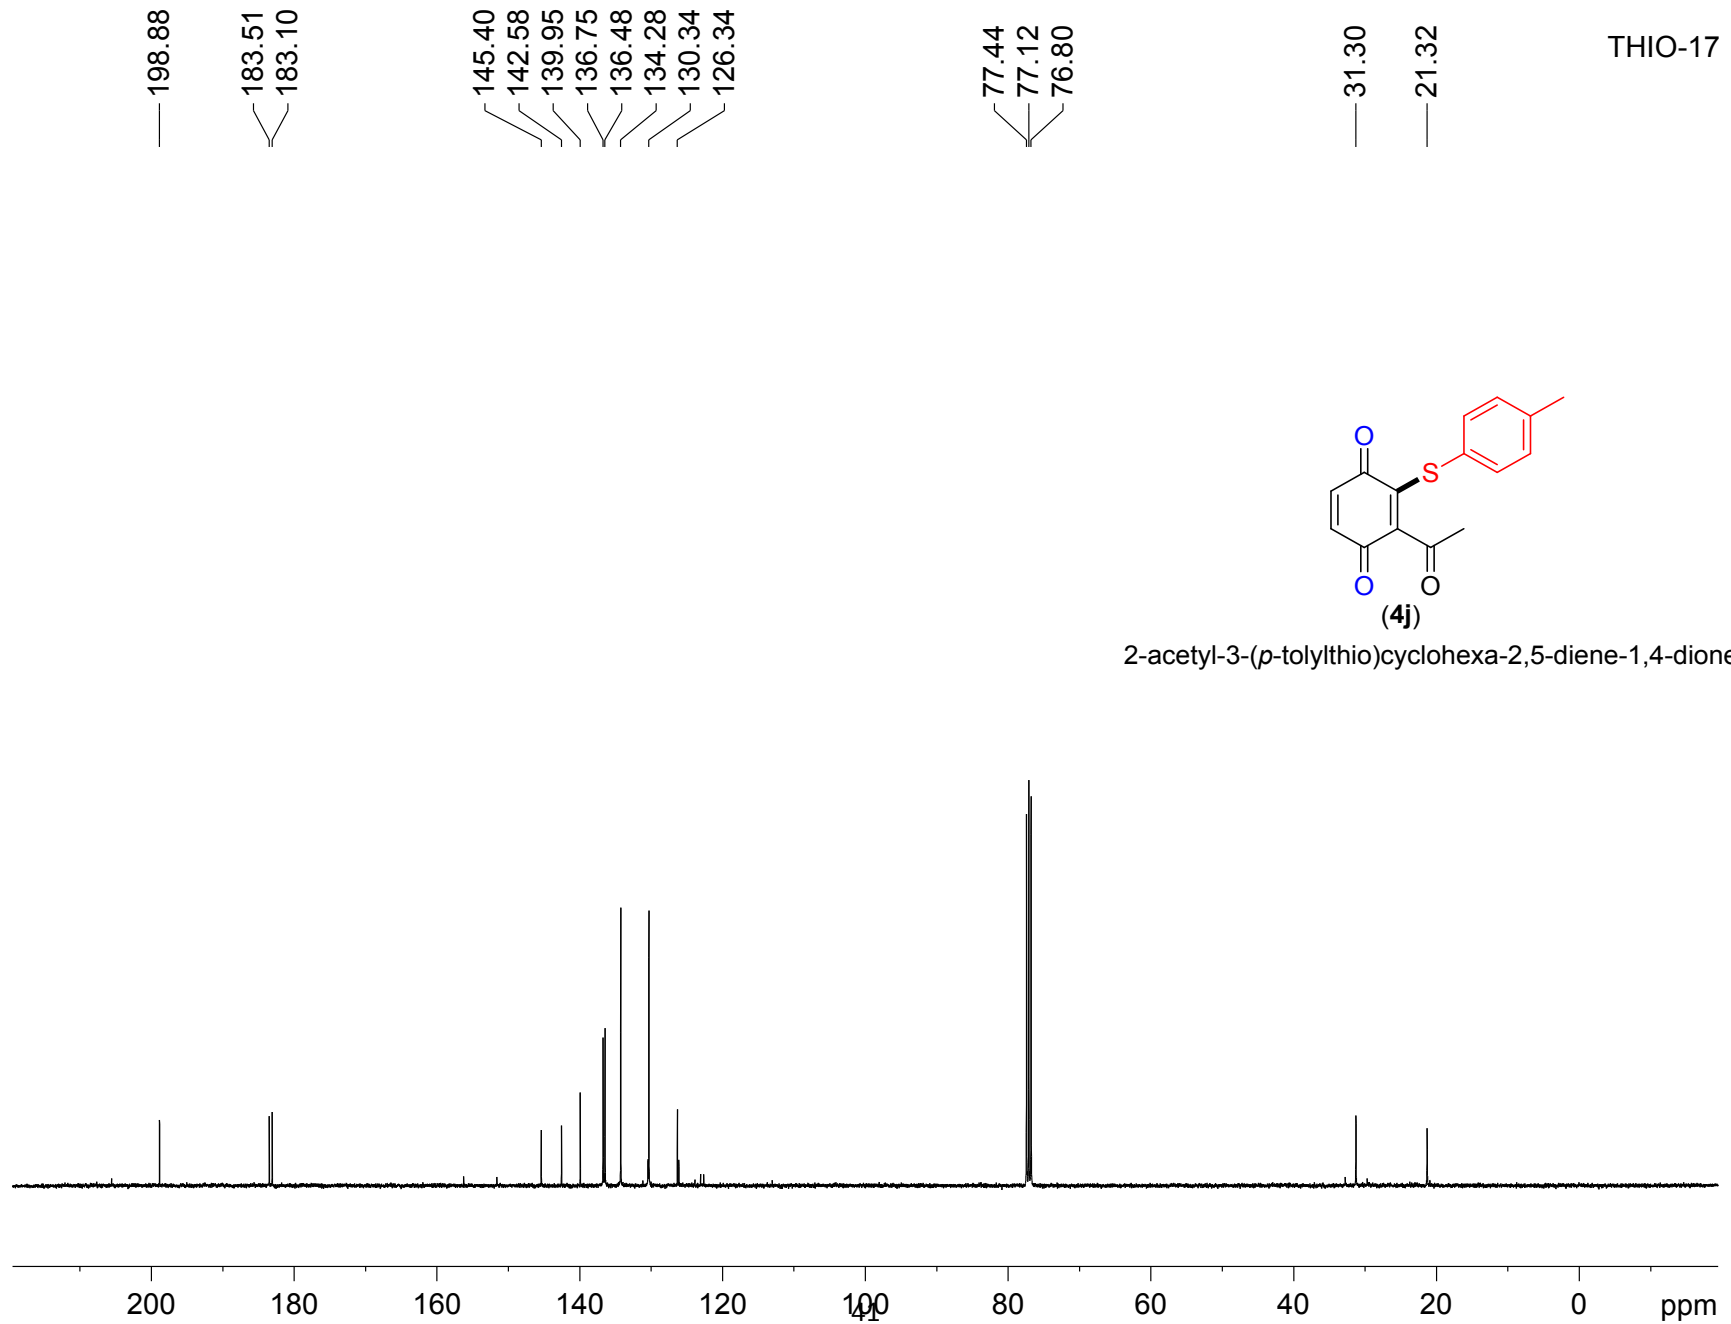

THIO-17

2-acetyl-3-(p-tolylthio)cyclohexa-2,5-diene-1,4-dione

THIO-27

7.517  
7.513  
7.491  
7.486  
7.462  
7.444  
7.425  
7.420  
7.416  
7.412  
6.854  
6.829  
6.722  
6.716  
6.696  
6.690  
5.906  
5.900

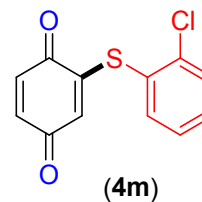

2-((2-chlorophenyl)thio)cyclohexa-2,5-diene-1,4-dione

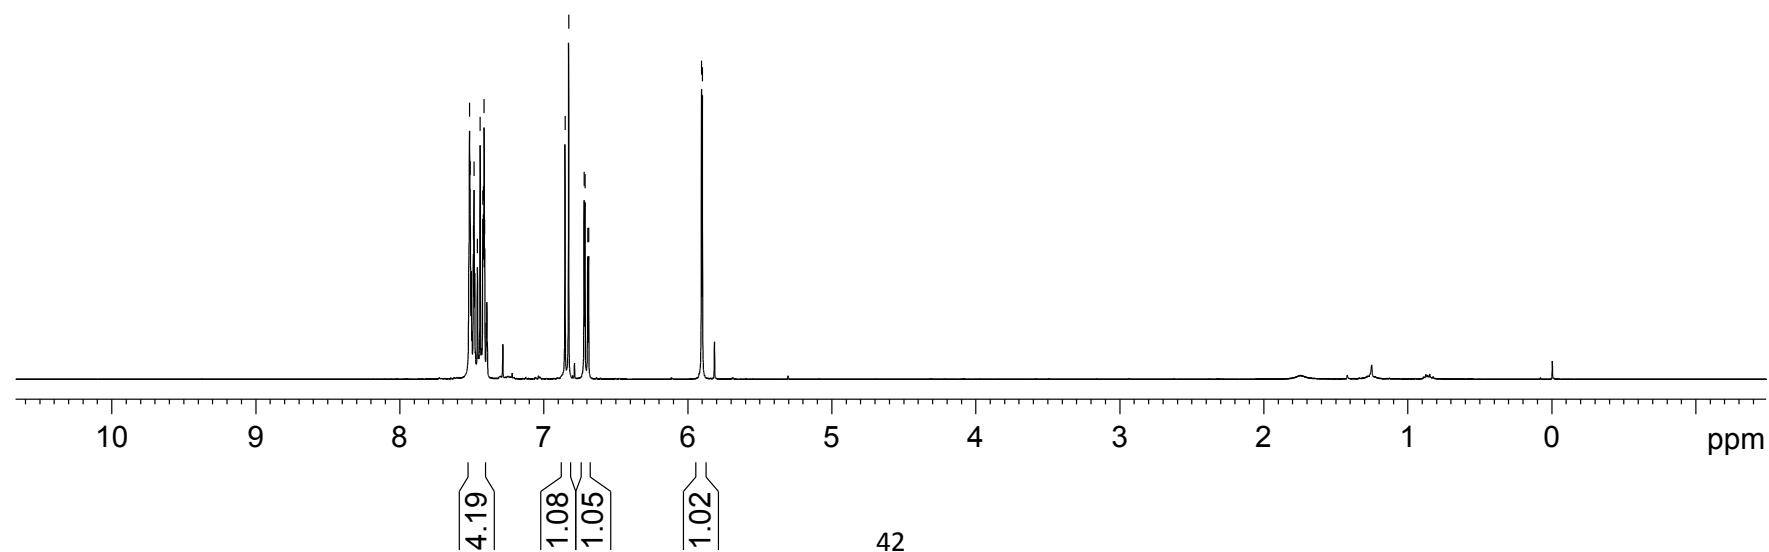

THIO-27

184.31  
183.65

153.63  
137.50  
135.93  
135.85  
135.33  
133.80  
131.44  
130.96  
128.78  
126.14

77.44  
77.12  
76.81

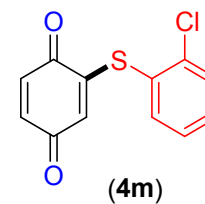

2-((2-chlorophenyl)thio)cyclohexa-2,5-diene-1,4-dione

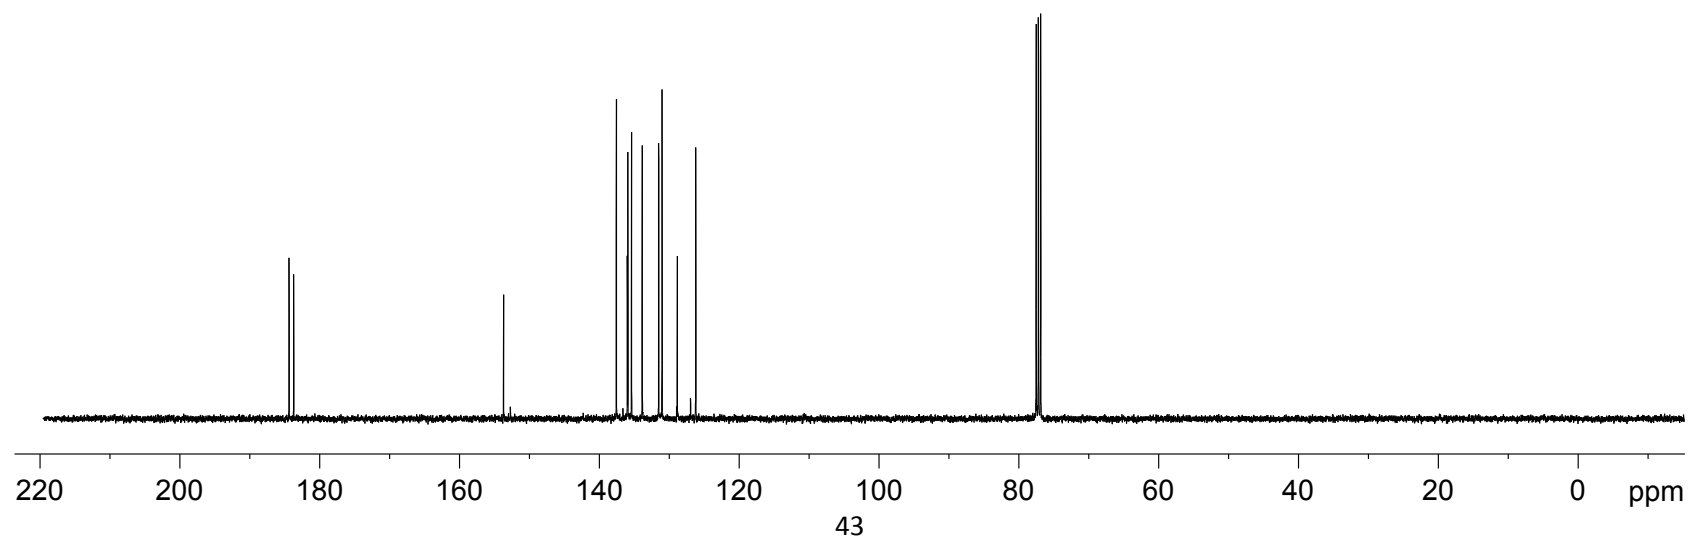

7.558  
7.552  
7.545  
7.543  
7.532  
7.528  
7.526  
7.520  
7.510  
7.298  
7.295  
7.279  
7.276  
7.260  
7.257  
7.251  
7.230  
6.857  
6.832  
6.721  
6.715  
6.696  
6.690  
5.882  
5.878  
5.876  
5.873

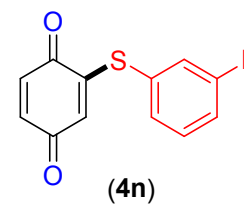

2-((3-fluorophenyl)thio)cyclohexa-2,5-diene-1,4-dione

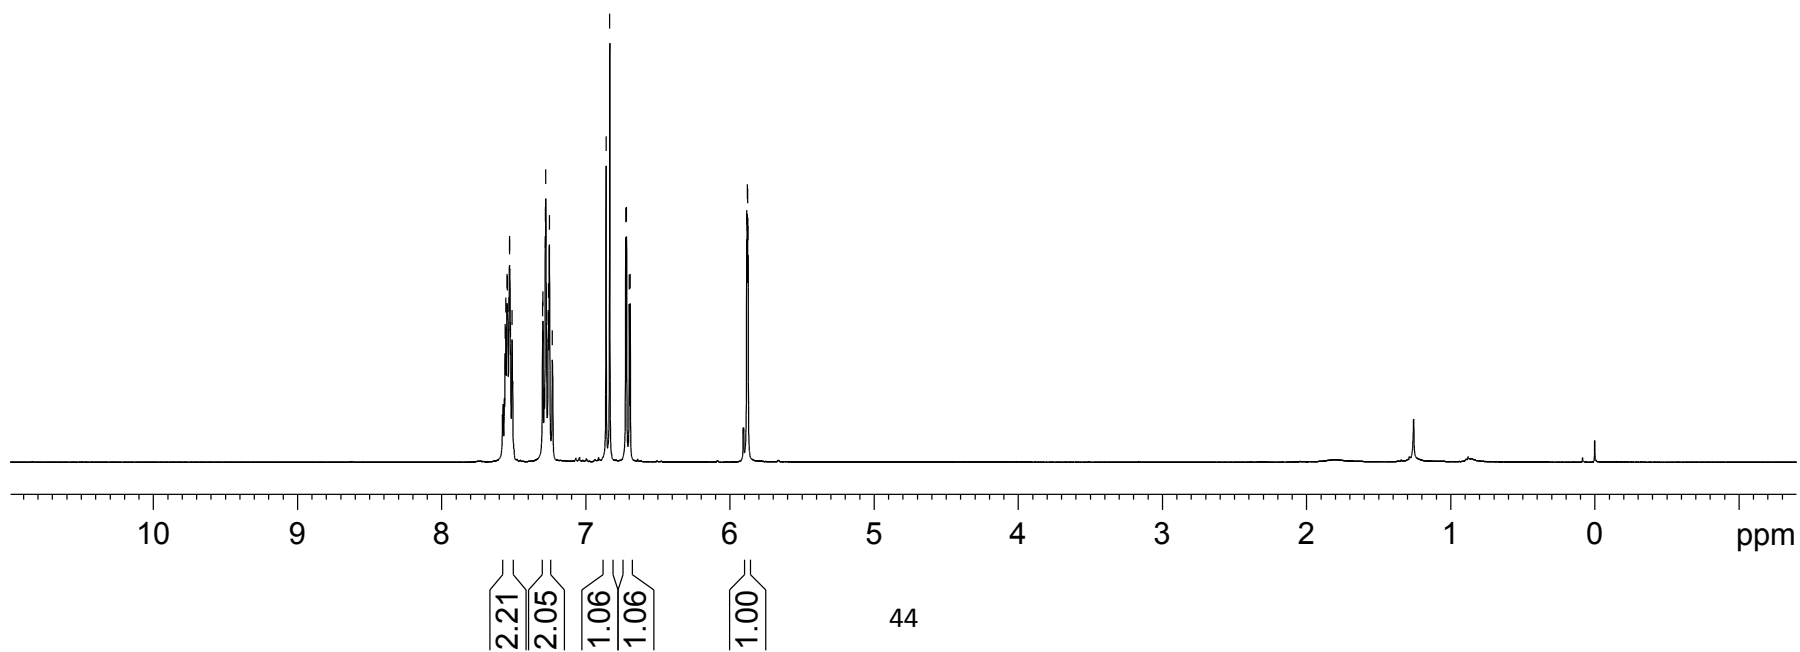

184.36  
183.78

163.94  
161.44  
151.77  
137.50  
137.39  
135.92  
133.49  
133.41  
126.04  
125.89  
125.85  
117.20  
116.98  
114.18  
114.00

77.44  
77.12  
76.80

THIO-26

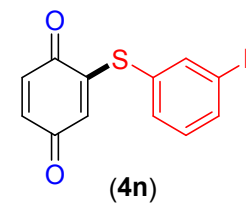

2-((3-fluorophenyl)thio)cyclohexa-2,5-diene-1,4-dione

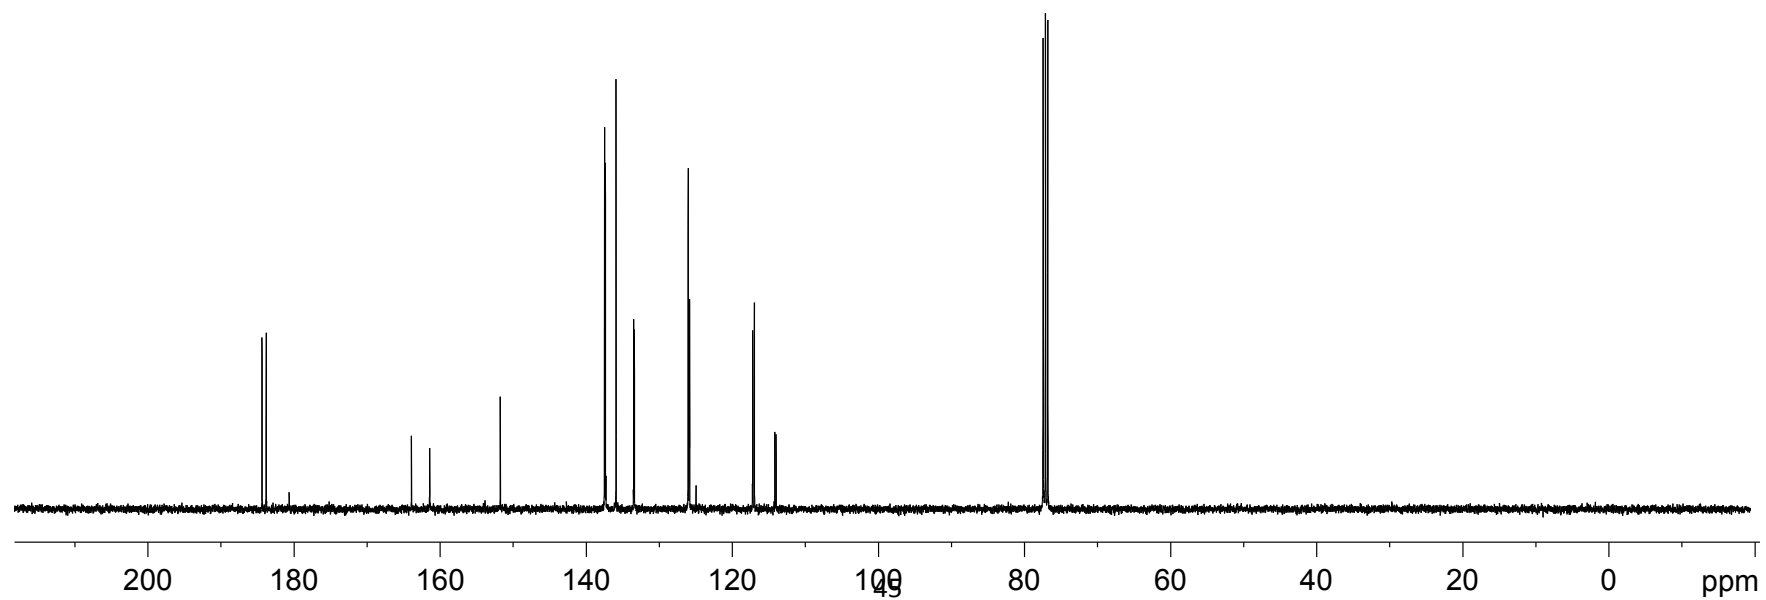

THIO-21

7.891  
7.886  
7.601  
7.577  
7.448  
7.443  
7.426  
7.422  
7.389  
7.367  
7.269  
6.956  
6.952  
6.931  
6.927  
6.744  
6.739

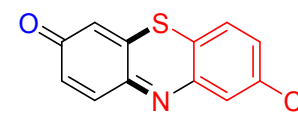

(5a)

8-chloro-3*H*-phenothiazin-3-one

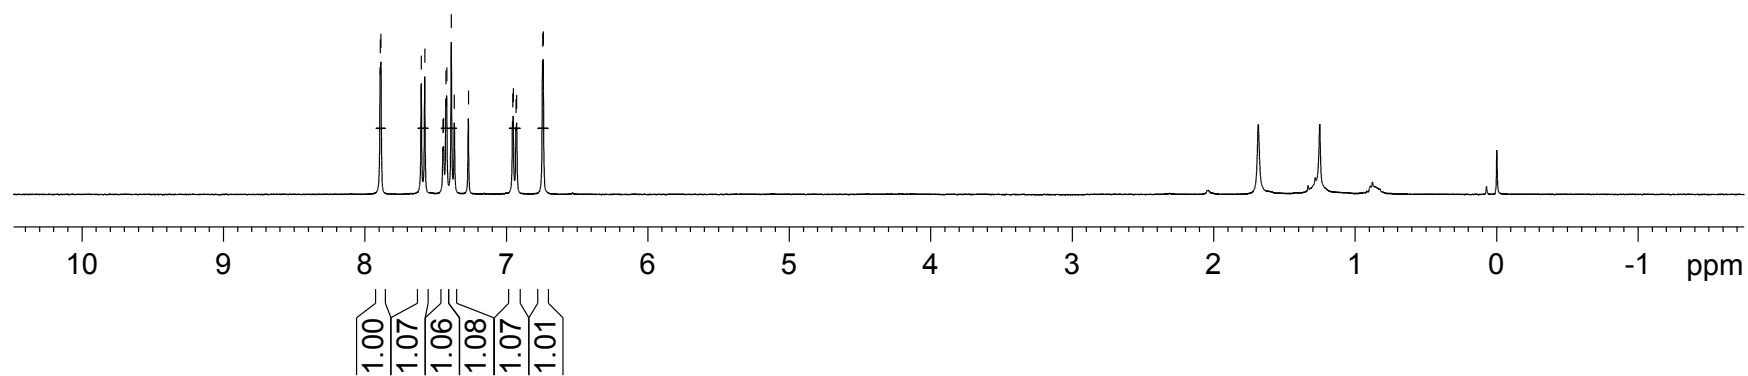

THIO-21

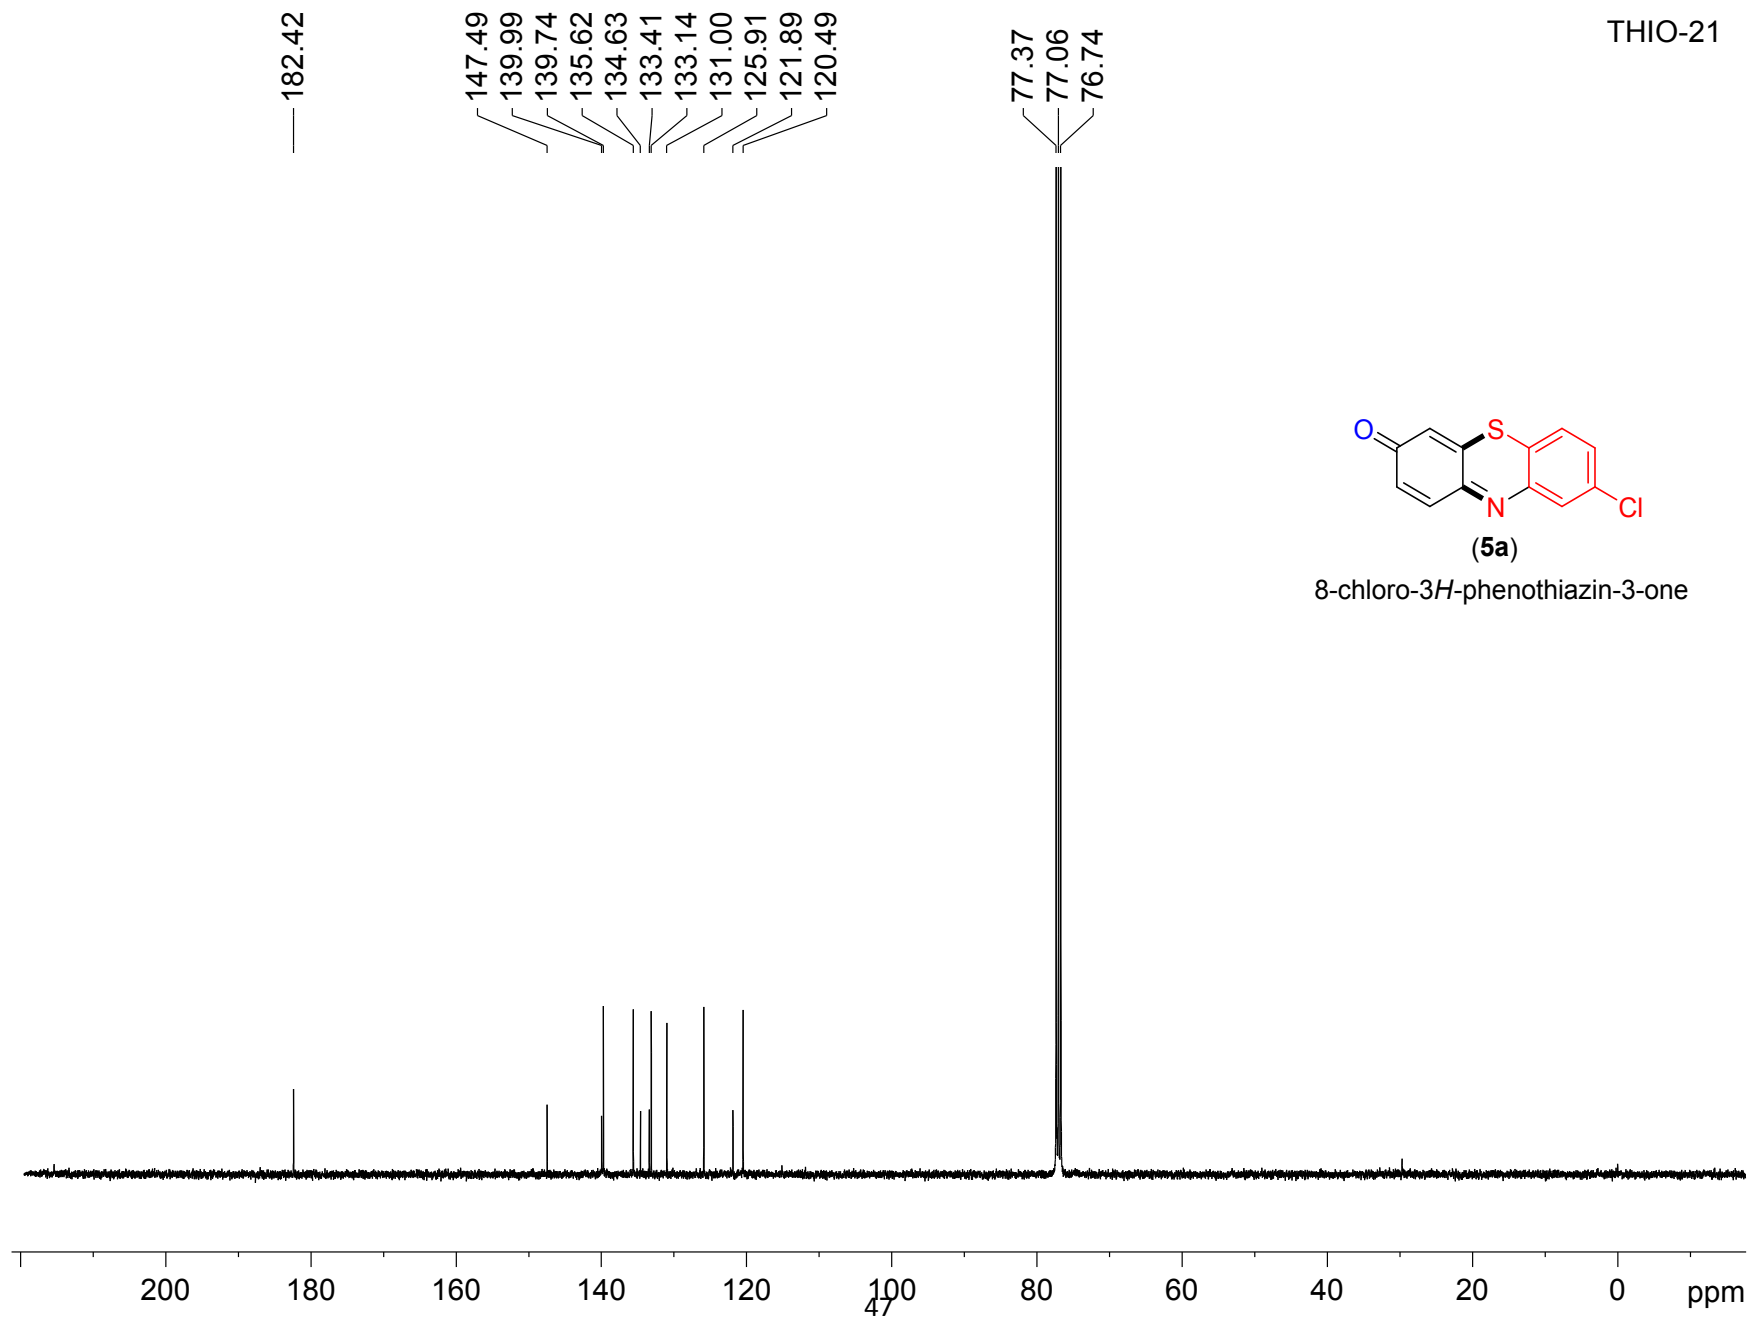

8.133  
7.675  
7.654  
7.620  
7.595  
7.562  
7.541  
7.270  
6.971  
6.966  
6.946  
6.941  
6.765  
6.760

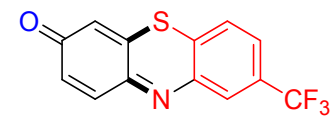

(5b)

8-(trifluoromethyl)-3H-phenothiazin-3-one

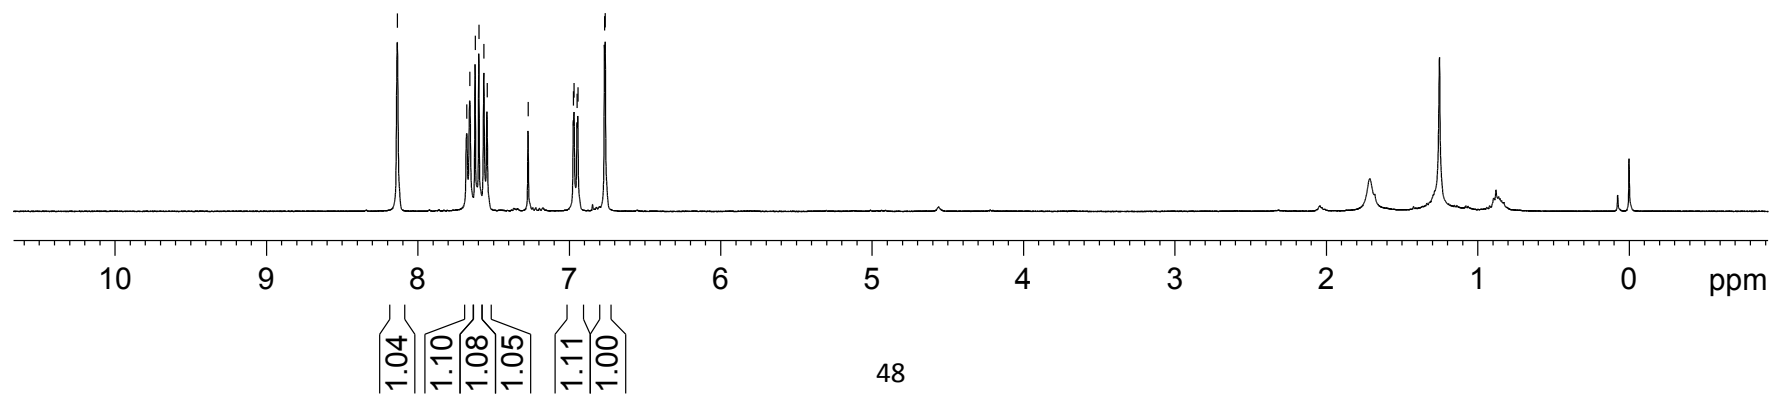



THIO-20

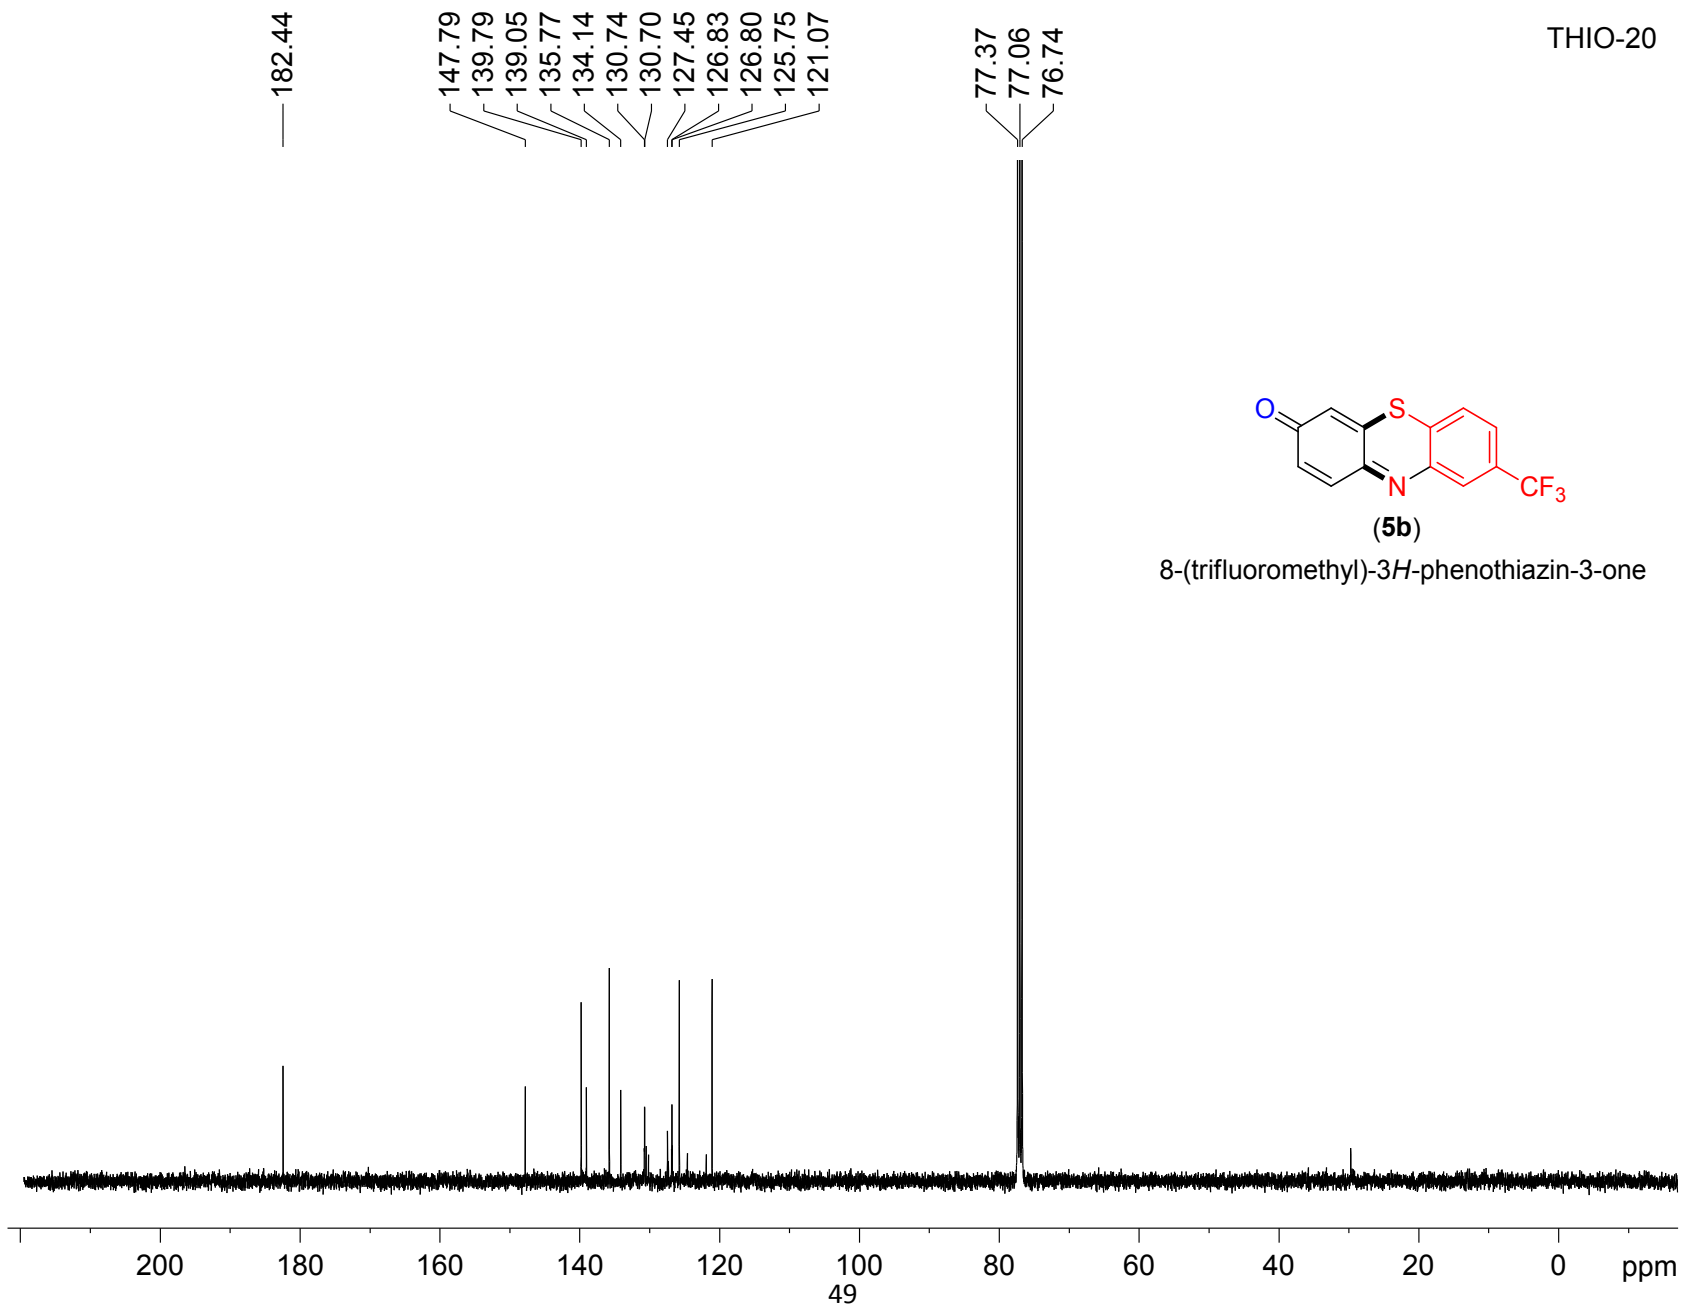

THIO-22

7.855  
7.850  
7.461  
7.410  
7.405  
7.389  
7.383  
7.359  
7.338  
7.263  
6.661

1.387

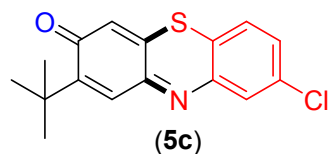

2-(*tert*-butyl)-8-chloro-3*H*-phenothiazin-3-one

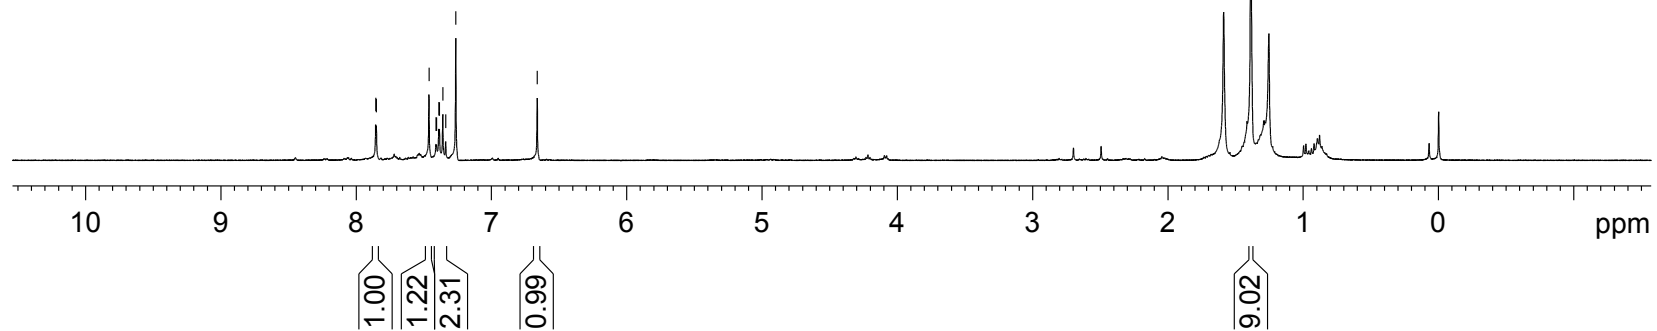

8.080  
8.067  
8.062  
8.057  
8.045  
7.704  
7.695  
7.686  
7.256

3.808  
3.795  
3.782  
3.350  
3.336  
3.322

— 2.388

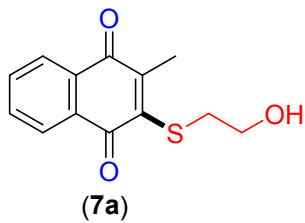

2-((2-hydroxyethyl)thio)-3-methylnaphthalene-1,4-dione  
(Hep 3B Inhibitor)

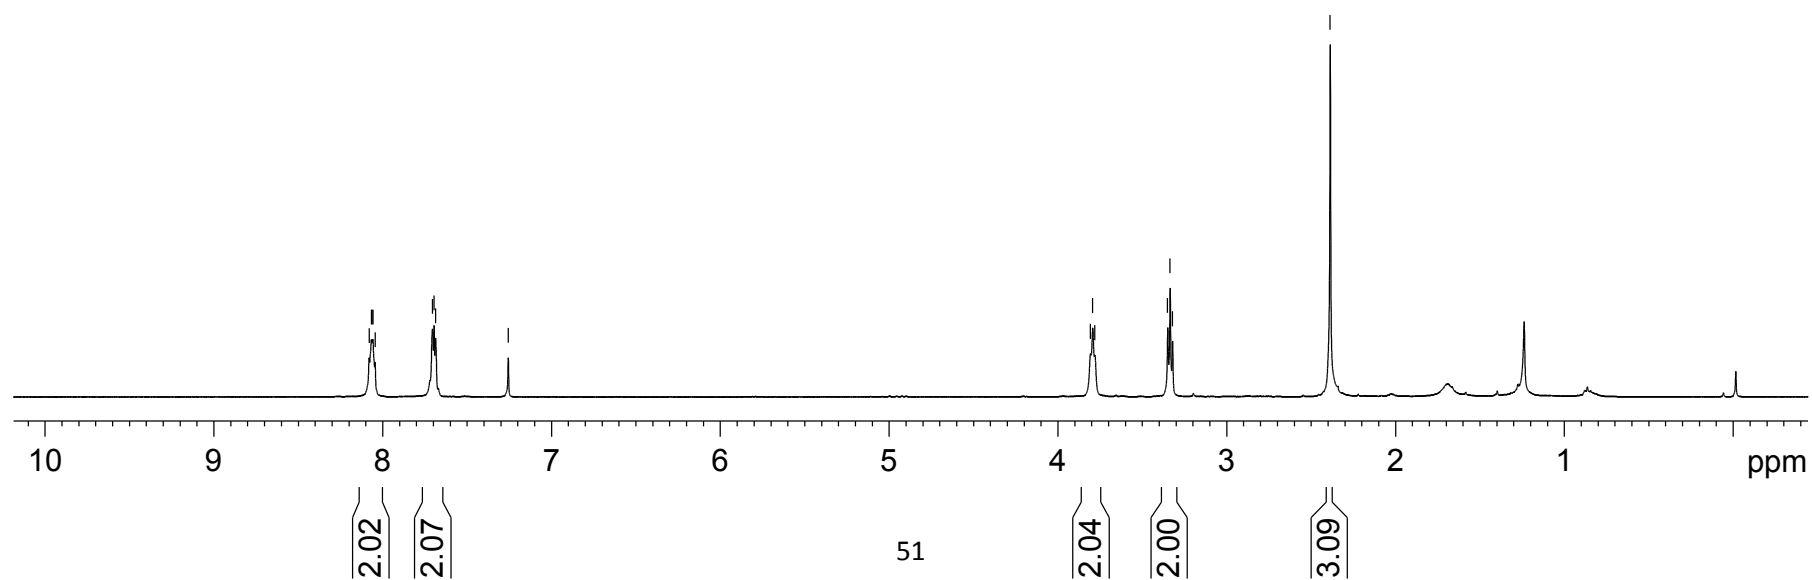

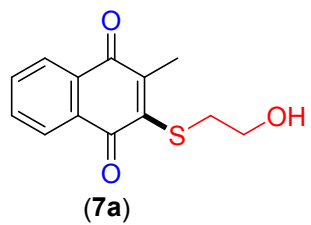

2-((2-hydroxyethyl)thio)-3-methylnaphthalene-1,4-dione  
(Hep 3B Inhibitor)

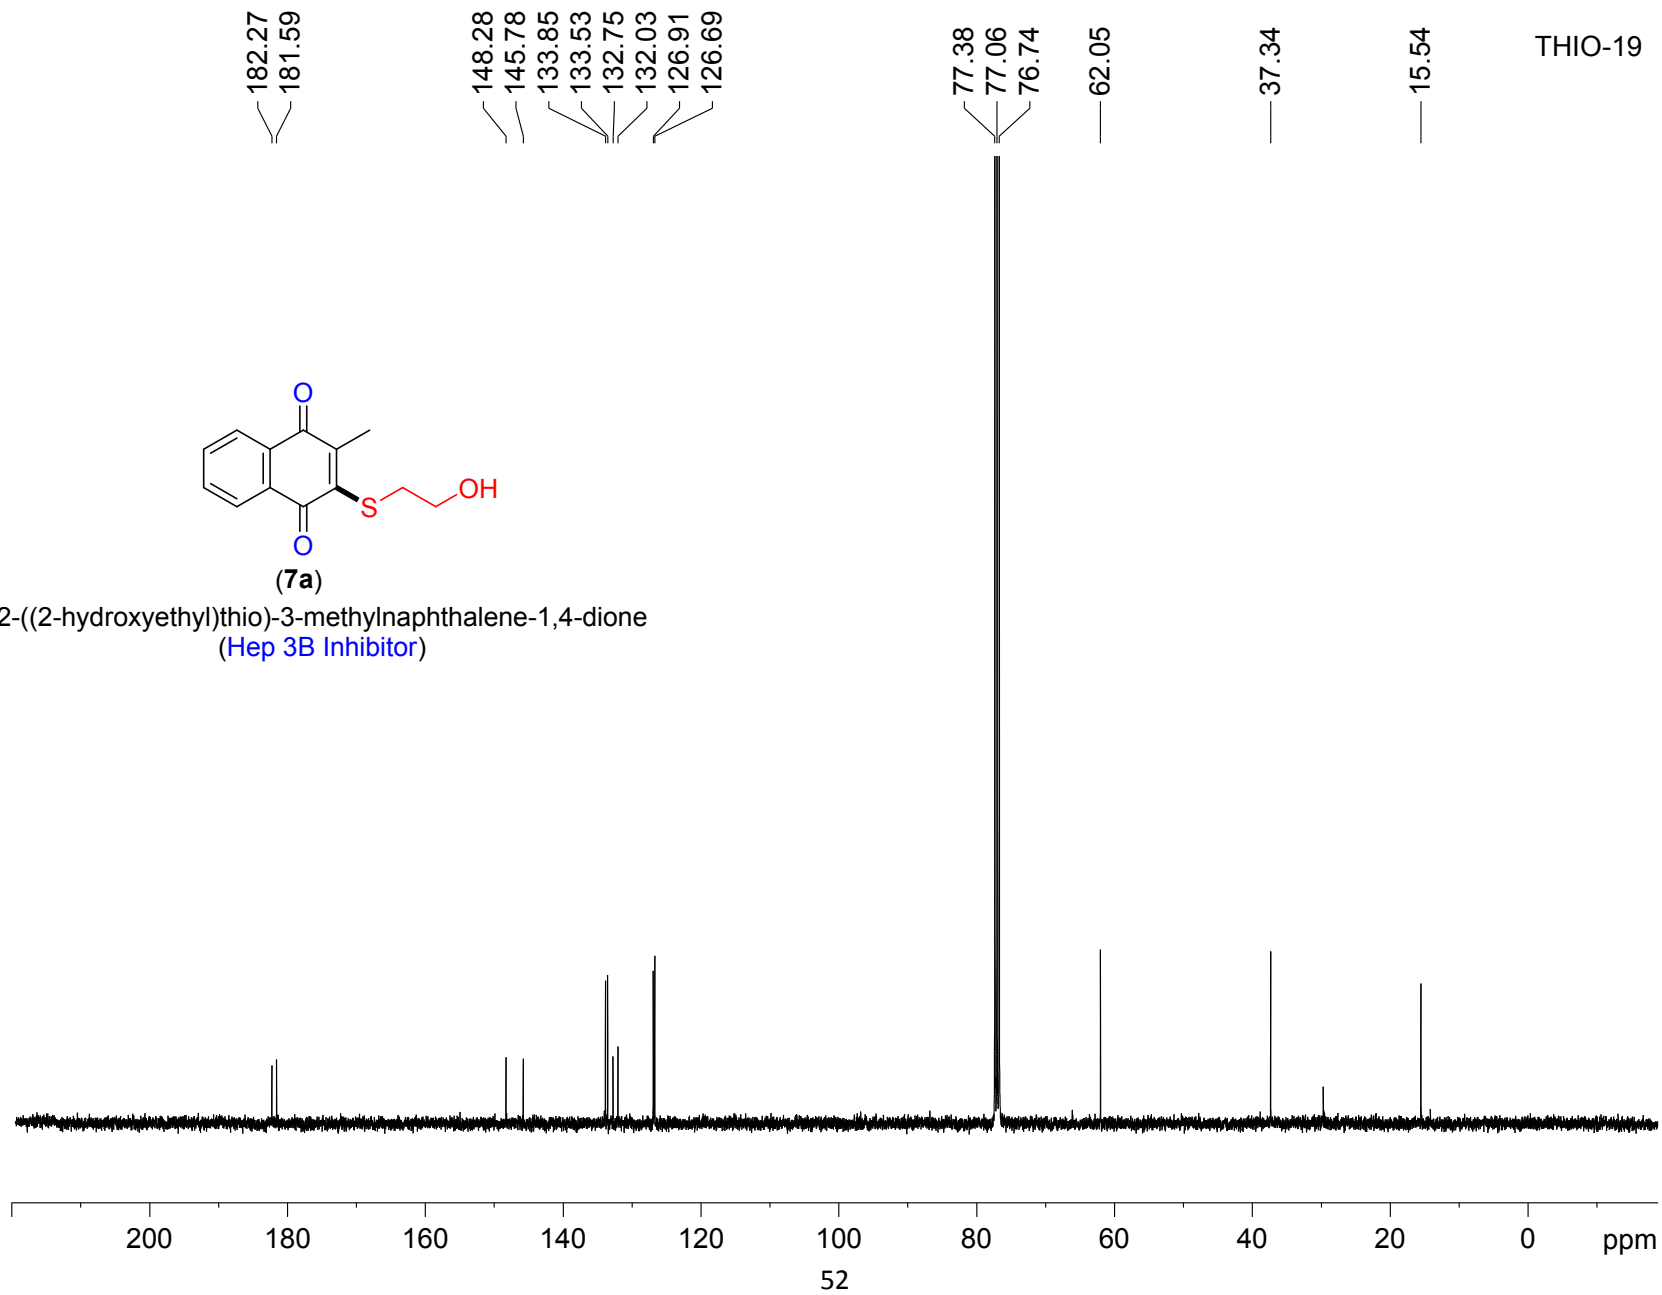

THIO-18

7.375  
7.355  
7.273  
7.261  
7.253

5.751

2.392

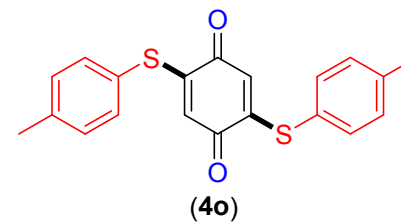

2,5-bis(*p*-tolylthio)cyclohexa-2,5-diene-1,4-dione

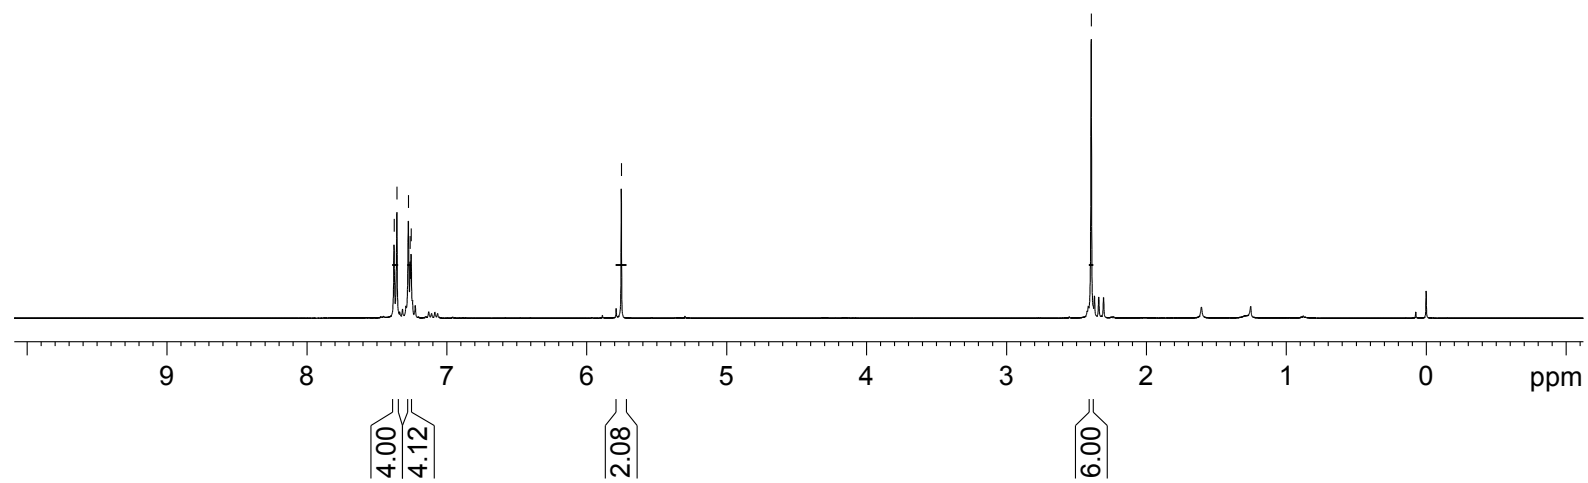

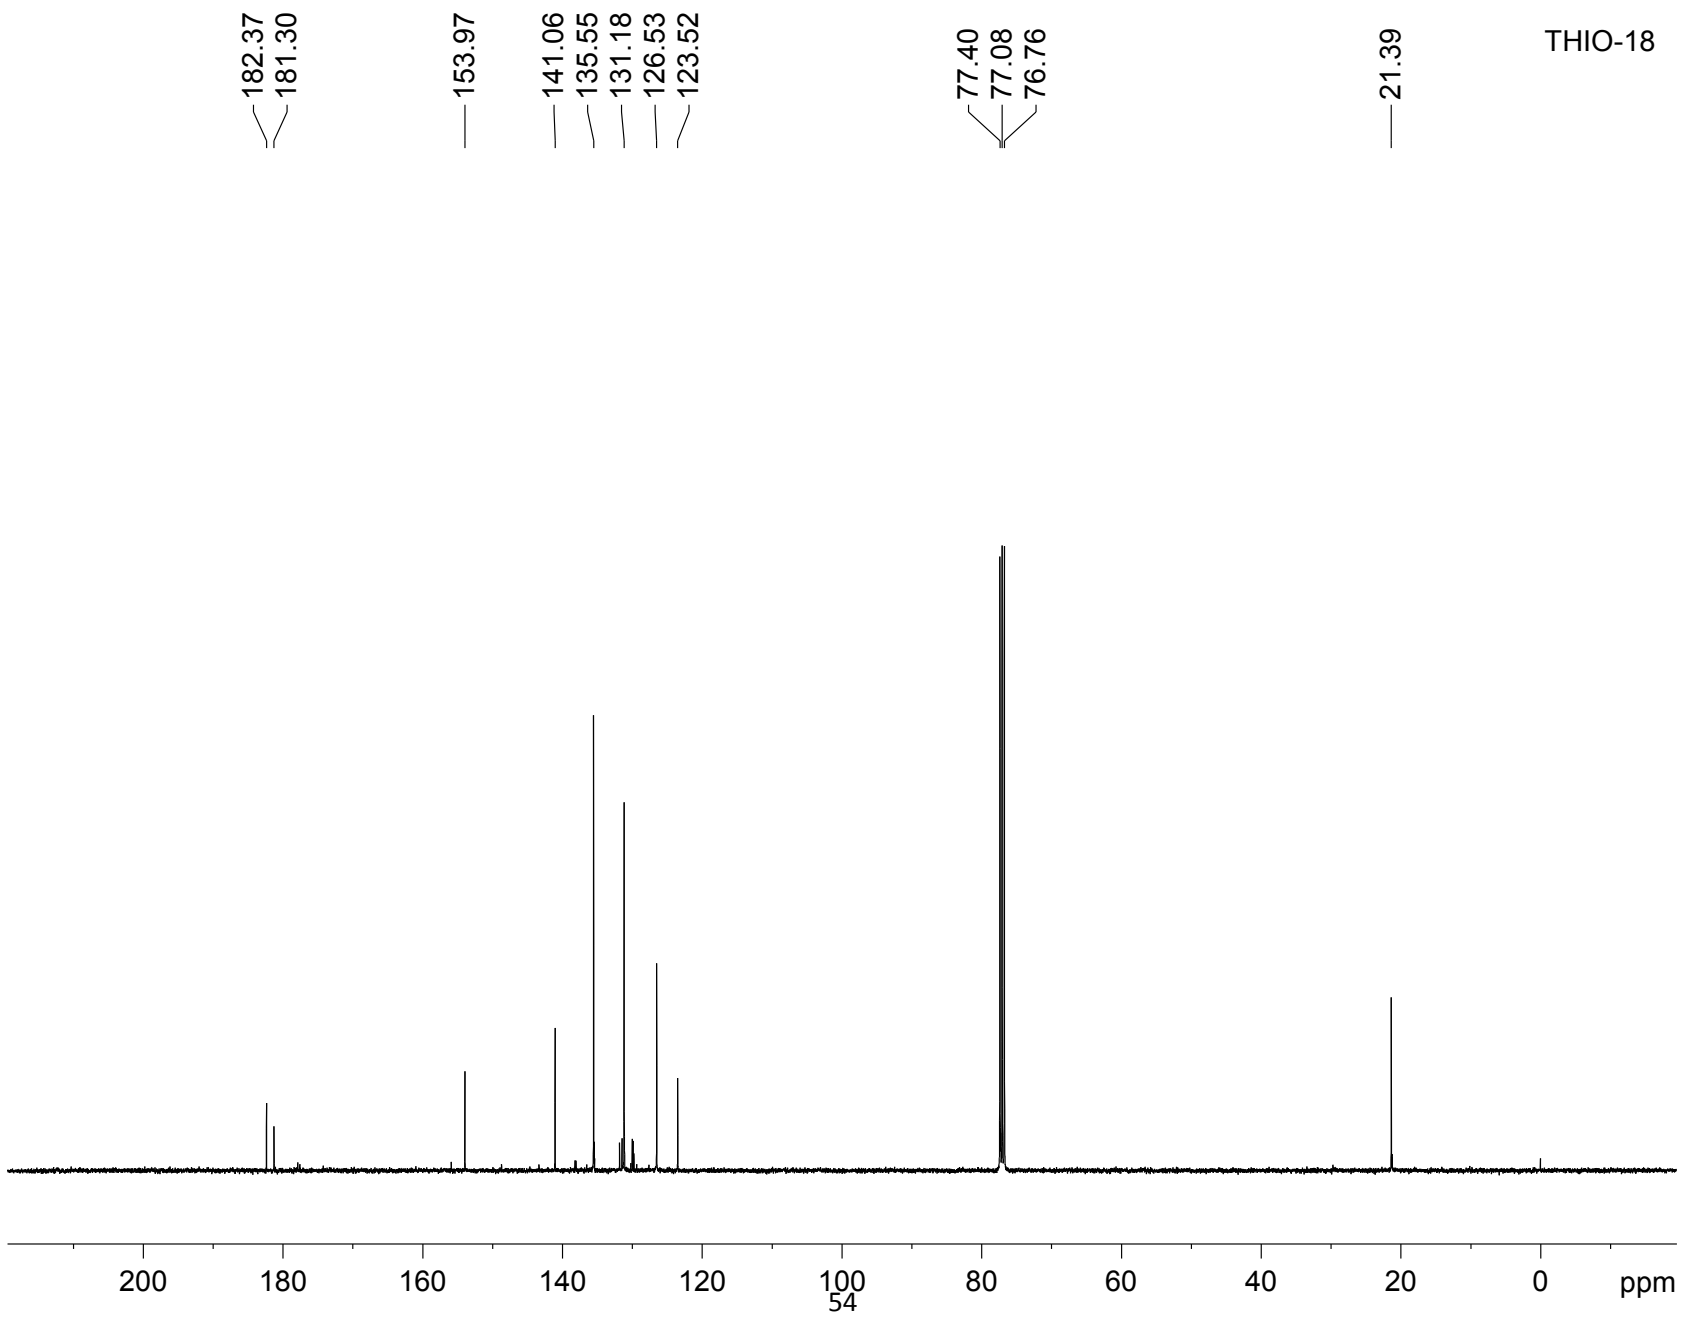

THIO-23 (Tert-butyl BQ)

THIO-23 (Tert butyl BQ)

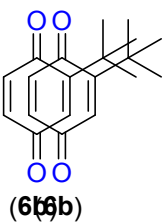

2-(tert-butyl)cyclohexa-2,5-diene-1,4-dione

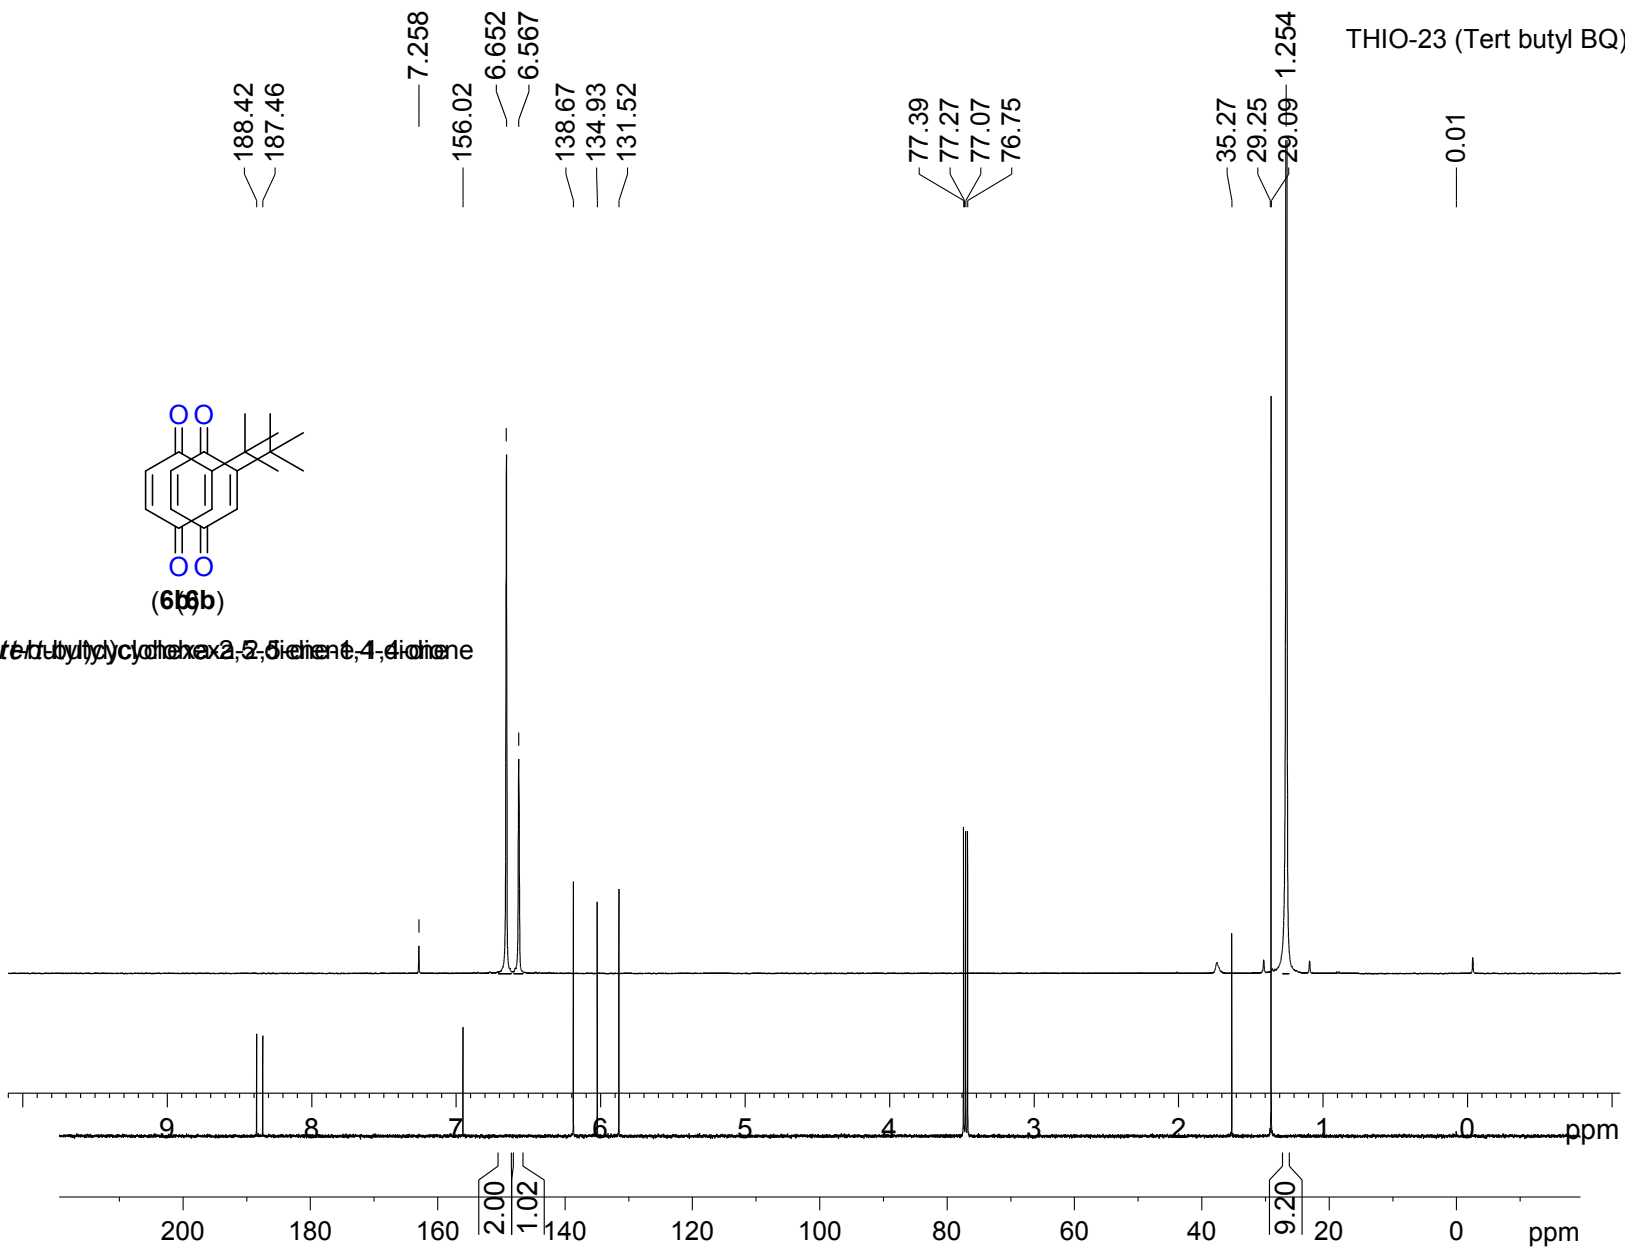

## 2. ADME-PK properties and molecular characterization

Computational methods are being used to filter and select compounds based on different molecular characteristics that are considered to be relevant to predict the drug-likeness of molecules. Without the aid of computational methods, the drug development process would be more time-consuming and less efficient, however, it is important to mention that the filtering rules employed by these methods are not absolute answers to the problem and that experimental confirmation is compulsory. A number of compounds fail during clinical phases due to poor pharmacokinetic and safety properties, therefore, the growing number of public and commercial *in silico* tools to predict ADMET (absorption, distribution, metabolism, excretion and toxicity) parameters is not surprising.

Pharmacokinetics and drug-likeness prediction for the synthesized compounds **5a-c** were performed by online tool SwissADME<sup>1a</sup> of Swiss Institute of Bioinformatics (<http://www.sib.swiss>).<sup>1b</sup> 2D structural models were drawn in ChemBioDraw Ultra version 15.0 (Cambridge Software) and SMILES of **5a-c** was translated into molfile by online SMILES translator and structure file generator found in Online tool SwissADME. The analysis task was done to check whether the compound were inhibitor of isoforms of Cytochrome P450 (CYP) family such as CYP1A2, CYP2C19, CYP2C9, CYP2D6 and CYP3A4. In addition, pharmacokinetics (such as gastrointestinal absorption, P-glycoprotein and blood brain barrier) and drug-likeness prediction such as Lipinski, Ghose and Veber rules and bioavailability score.<sup>1c-e</sup> The Lipinski, Ghose, Egan, Mugges and Veber rules were applied to assess drug likeness to predict whether a compound is likely to be a bioactive according to some important parameters such as molecular weight, Log *P*, number of HPA and HBD. The SwissADME tool used vector machine algorithm (SVM)<sup>2f</sup> with fastidiously cleaned large datasets of known inhibitors/non-inhibitors as well as substrates/non-substrates.

**Table-1** Pharmacokinetic studies of compound **5a-c**

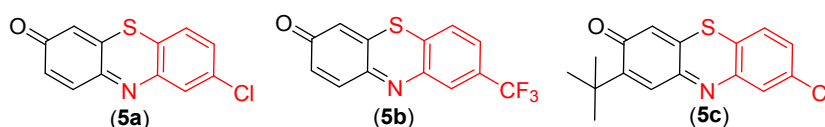

| Pharmacokinetics properties |      |                |                             |      |                               |         |        |        |        |               |
|-----------------------------|------|----------------|-----------------------------|------|-------------------------------|---------|--------|--------|--------|---------------|
| GI absorption               |      | BBB permeation | Log <i>p</i> <sub>o/w</sub> | P-gp | Inhibition of cytochrome P450 |         |        |        |        | Log <i>Kp</i> |
|                             |      |                |                             |      | CYP1A2                        | CYP2C19 | CYP2C9 | CYP3A4 | CYP2D6 |               |
| <b>5a</b>                   | High | Yes            | 3.11                        | No   | ×                             | √       | ×      | ×      | ×      | -5.93 cm/s    |
| <b>5b</b>                   | High | Yes            | 3.61                        | No   | √                             | √       | ×      | ×      | ×      | -5.95 cm/s    |
| <b>5c</b>                   | High | Yes            | 3.61                        | No   | √                             | √       | √      | ×      | ×      | -5.08 cm/s    |

GI-Gastrointestinal absorption  
 BBB- Blood brain barrier permeability  
 Log *P*<sub>o/w</sub>-Lipophilicity  
 P-gp- P-glycoprotein substrate  
 Log *Kp*- Skin permeation



**Table-2** Drug-likeness and Medicinal Chemistry

| Drug-likeness and Medicinal Chemistry |       |               |       |       |      |       |                  |                        |               |               |                         |
|---------------------------------------|-------|---------------|-------|-------|------|-------|------------------|------------------------|---------------|---------------|-------------------------|
| Log s                                 |       | Drug-likeness |       |       |      |       | Bio-availability | Medicinal properties   |               |               | Synthetic accessibility |
|                                       |       | Lipinski      | Ghose | Veber | Egan | Mugge |                  | TPSA (Å <sup>2</sup> ) | PAINS (alert) | lead likeness |                         |
| 5a                                    | -3.69 | √             | √     | √     | √    | √     | 0.55             | 58.20                  | 0             | No (MW<350)   | 2.67                    |
| 5b                                    | -3.90 | √             | √     | √     | √    | √     | 0.55             | 58.20                  | 0             | Yes           | 2.81                    |
| 5c                                    | -4.90 | √             | √     | √     | √    | √     | 0.55             | 58.20                  | 0             | No XLOGP3>3.5 | 3.07                    |

Log s-Solubility class  
 TPSA- Topological polar surface area  
 PAINS- Pan assay interference structure

### 3. Molecular docking studies of compound 5b with AChE target

The docking analyses were performed using Glide tool of Schrödinger-Maestro (ver10.7) package (Schrödinger, LLC, New York, NY, 2013). The compound **5a** was sketched by using Chemdraw 12.0 software and converted to .mol file format with the standard settings and processed with default parameters of Ligprep tool from Schrodinger,<sup>2</sup> described by Greenwood *et al.*, 2010. In this study, the compound 5a was docked with active site of AChE (PDB ID- 1EVE). The 3D structure of proteins were downloaded from the RSCB- Protein Data Bank (PDB) website and prepared for the docking by removing of all water molecules. For grid generation, the hydrogen's were added, bond orders were assigned and water molecules beyond 5Å from the hetero groups were deleted in the imported protein and sitemap tool was used to locate the binding sites. For protein-ligand docking, the formation of H-bond between the ligand and the residues of the active site and its length along with Glide XP score,<sup>3</sup> were recorded with the help of Glide-Ligand docking tool of Maestro in cluster node of High-Performance Computing Facility (HPC).

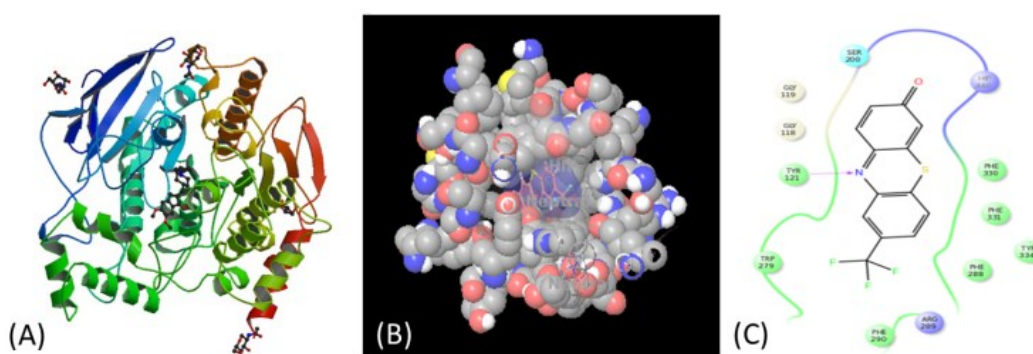

**Figure 1.** (A) Acetylcholinesterase (AChE) proteins; (B) 3D and (C) 2D structure of protein-ligand interaction.

**Table-3** Binding interactions of the protein-ligand complexes

| Mole. | PDB ID | Interactions | Residues | Distance (Å) | Glide XP Score (Kcal/mol) | Glide emodel score |
|-------|--------|--------------|----------|--------------|---------------------------|--------------------|
| 5b    | 1EVE   | H-bond       | Tyr 121  | 1.80         | -7.30                     | -44.18             |

PBD- Protein Data Bank

#### 4. Reference

- (a) V. Zoete, A. Daina, C. Bovigny, O. Michielin. *J. Chem. Inf. Model.*, 2016, **56**, 1399-1404. (b) A. Daina, O. Michielin, and V. Zoete., *Sci. Rep.*, 2017, **7**, 427-517. (c) C. Lipinski, F. Lombardo, B. Dominy, P. Feeney. *Adv. Drug. Deliv. Rev.*, 2011, **46**, 3-26., (d) A. K. Ghose, V.N. Viswanadhan, J. J. Wendoloski. *J. Comb. Chem.*, 1999, **1**, 55-68. (e) D. F. Veber, S. R. Johnson, H. Y. Cheng, B. R. Smith, K. W. Ward. *J. Med. Chem.* 2002, **45**, 2615-2623., (f) C. Cortes and V. Vapnik. *Mach. Learn.* 1995, **20**, 273-297.
- Greenwood J. R, Calkins D, Sullivan A. P, Shelley J.C., *J. Comput. Aided Mol. Des.*, 2010, **24**, 591-604.
- Friesner R. A, Banks, J. L, Murphy R. B, Halgren T. A, Klicic J. J, Mainz D. T, Repasky M. P, Knoll E. H, Shelley M, Perry J. K. *J. Med. Chem.* 2004, **47**, 1739-1749.
